# Supplementary material for: Proteomics and Phosphoprotoemic Measurements Enhance Ability to Predict Ex Vivo Drug Response in AML
Source: Research Square preprint supplement (doi:10.21203/rs.3.rs-1277906/v1), 2022-01-26
Supplement: Supplementary file 1 [file 409023be29563c742db5e89b.xlsx]

## Sheet: table S1
Drug	Patients with proteomics	Patients with mRNA	Patients with Mutations
17-AAG (Tanespimycin)	38	25	32
A-674563	36	23	30
BEZ235	37	25	31
Cabozantinib	37	24	31
Dovitinib (CHIR-258)	37	24	31
Elesclomol	33	21	28
Entrectinib	18	8	14
Flavopiridol	37	24	31
Foretinib (XL880)	37	24	31
GDC-0941	36	23	30
Gilteritinib (ASP-2215)	20	9	15
INK-128	38	25	32
JNJ-28312141	32	23	27
JQ1	24	13	19
Panobinostat	21	10	16
PI-103	37	25	31
Ponatinib (AP24534)	34	22	29
PP242	37	24	31
Quizartinib (AC220)	35	22	30
Selinexor	20	9	15
Selumetinib (AZD6244)	36	24	30
SNS-032 (BMS-387032)	38	25	32
Sorafenib	37	25	31
Staurosporine	11	10	10
Trametinib (GSK1120212)	38	25	32
Venetoclax	24	13	19

## Sheet: table S2
compound	method	Molecular	genelist	meanCor	samples	enrich
Sorafenib	LogisticReg	mRNALevels;proteinLevels;binaryMutations;Phosphosite	mRNALevelsLINC00535;mRNALevelsRP11-561I11.4;proteinLevelsGRK2;proteinLevelsRASGRP2;proteinLevelsINPP5D;PhosphositeMAP1A-S1326s;PhosphositeNFIX-S265s	1	29.6
Quizartinib (AC220)	LogisticReg	mRNALevels;proteinLevels;binaryMutations;Phosphosite	mRNALevelsHOXB5;proteinLevelsMYO1C;proteinLevelsHNRNPA2B1;proteinLevelsANP32A;proteinLevelsSCAI;proteinLevelsINPP5D;proteinLevelsGPBP1L1;proteinLevelsRBM22;proteinLevelsSARDH;proteinLevelsDCAF1;PhosphositeFCHO1-S576s;PhosphositeHNRNPD-S83s;PhosphositeTOR1AIP1-S135sS143s;PhosphositeMICAL1-T475t;PhosphositeRANBP3-S244s;PhosphositeLEMD3-S144s;PhosphositeNCOR2-S1982s	0.791414	28
Quizartinib (AC220)	LogisticReg	proteinLevels;Phosphosite	proteinLevelsMYO1C;proteinLevelsHNRNPA2B1;proteinLevelsANP32A;proteinLevelsGNPDA1;proteinLevelsTTC19;proteinLevelsSCAI;proteinLevelsINPP5D;proteinLevelsGPBP1L1;proteinLevelsDCAF1;PhosphositeFCHO1-S576s;PhosphositeTPR-S2155s;PhosphositeHNRNPD-S83s;PhosphositeTOR1AIP1-S135sS143s;PhosphositeMICAL1-T475t;PhosphositeRANBP3-S244s;PhosphositeSMC3-S1065sS1067s;PhosphositeXPC-S515s;PhosphositeLEMD3-S144s;…	0.791414	28
Quizartinib (AC220)	LogisticReg	proteinLevels	proteinLevelsLSM8;proteinLevelsHNRNPA2B1;proteinLevelsGK;proteinLevelsANP32A;proteinLevelsCLK1;proteinLevelsTTC19;proteinLevelsZDHHC17;proteinLevelsSCAI;proteinLevelsINPP5D;proteinLevelsUNK;proteinLevelsGPBP1L1;proteinLevelsCBX8;proteinLevelsSARDH;proteinLevelsDCAF1;proteinLevelsHOOK2;proteinLevelsEXO1	0.791414	28
Venetoclax	ElasticNet	mRNALevels;proteinLevels;binaryMutations;Phosphosite	proteinLevelsSDCBP;proteinLevelsDPYSL4;proteinLevelsLYRM1;proteinLevelsPRKRA;proteinLevelsGSR;proteinLevelsCRP;proteinLevelsCSTB;proteinLevelsC4A;proteinLevelsC4B;proteinLevelsRRAS;proteinLevelsEZR;proteinLevelsPOR;proteinLevelsFAS;proteinLevelsBLVRB;proteinLevelsGNPDA1;proteinLevelsMRE11;proteinLevelsRENBP;proteinLevelsFCGRT;proteinLevelsSAFB2;proteinLevelsLYPLAL1;proteinLevelsRPAP2;proteinLevel…	0.701905	19.2
SNS-032 (BMS-387032)	LogisticReg	mRNALevels;proteinLevels;binaryMutations;Phosphosite	mRNALevelsRPL7P48;mRNALevelsTMSB10P1;mRNALevelsRPL19P21;mRNALevelsRP11-344P13.3;mRNALevelsRP11-49O14.2;mRNALevelsSETP4;mRNALevelsRP11-488C13.6;mRNALevelsEIF5AP2;proteinLevelsTOMM70;proteinLevelsARPP19;proteinLevelsRUNX1;proteinLevelsMVK;proteinLevelsC18orf21;proteinLevelsNTAN1;proteinLevelsGCC1;proteinLevelsNOL12;PhosphositeATF2-S310sT323t;PhosphositeTCEA1-S135s;PhosphositeRRAGC-S382s;Phosphosite…	0.689426	30.4
A-674563	ElasticNet	proteinLevels	proteinLevelsRTCA;proteinLevelsSOCS2;proteinLevelsBACH1;proteinLevelsCLIC2;proteinLevelsDFFB;proteinLevelsCDK14;proteinLevelsUQCRH;proteinLevelsAHCY;proteinLevelsARG2;proteinLevelsBLMH;proteinLevelsLPIN1;proteinLevelsQPRT;proteinLevelsUBE2NL;proteinLevelsC1orf174;proteinLevelsUBE2J2;proteinLevelsPINX1;proteinLevelsNDUFAF3;proteinLevelsSHARPIN;proteinLevelsDENND5A;proteinLevelsSAXO1	0.680793	28.8	organic acid catabolic process,carboxylic acid catabolic process,small molecule catabolic process,alpha-amino acid catabolic process,cellular amino acid catabolic process,protein polyubiquitination,regulation of transcription involved in G1/S transition of mitotic cell cycle,apoptotic nuclear changes,cellular component disassembly involved in execution phase of apoptosis,sulfur amino acid metabol…
SNS-032 (BMS-387032)	LogisticReg	proteinLevels;Phosphosite	proteinLevelsTOMM70;proteinLevelsARPP19;proteinLevelsRUNX1;proteinLevelsMVK;proteinLevelsC18orf21;proteinLevelsCCDC58;proteinLevelsNOMO2;proteinLevelsXAF1;proteinLevelsNTAN1;proteinLevelsGCC1;PhosphositeNUFIP2-S629s;PhosphositeAKAP2-S785s;PhosphositeRBBP6-S772s;PhosphositeGTF3C1-S1868s;PhosphositeLYST-S2217sS2222s;PhosphositeEIF5B-Y134y	0.670158	30.4
Quizartinib (AC220)	ElasticNet	mRNALevels;proteinLevels;binaryMutations;Phosphosite	mRNALevelsRP11-387D10.3;proteinLevelsEBAG9;proteinLevelsCLIC2;proteinLevelsNBN;proteinLevelsCRADD;proteinLevelsLRRC41;proteinLevelsETFRF1;proteinLevelsSETD3;proteinLevelsSPRYD3;proteinLevelsRFWD2;proteinLevelsINPP5D;proteinLevelsPHAX;binaryMutationsKRAS;PhosphositeETFA-S192s;PhosphositeDNMT1-S143s;PhosphositePML-S518s;PhosphositeMRE11-S688sS689s;PhosphositeAGFG1-T177tS181s;PhosphositeAGFG1-S181s;…	0.669264	28
Foretinib (XL880)	ElasticNet	proteinLevels	proteinLevelsKMT2D;proteinLevelsCLIC2;proteinLevelsMBD4;proteinLevelsST6GAL1;proteinLevelsVCP;proteinLevelsCRADD;proteinLevelsMLLT1;proteinLevelsRBPJ;proteinLevelsSTAG2;proteinLevelsSPRYD3;proteinLevelsINPP5D;proteinLevelsBSDC1;proteinLevelsPOMT2;proteinLevelsWASH6P	0.667855	29.6	ER-associated misfolded protein catabolic process,cellular response to misfolded protein,response to misfolded protein,protein quality control for misfolded or incompletely synthesized proteins
Quizartinib (AC220)	LASSO	mRNALevels;proteinLevels;binaryMutations;Phosphosite	proteinLevelsEBAG9;proteinLevelsCLIC2;proteinLevelsCRADD;proteinLevelsLRRC41;proteinLevelsSETD3;proteinLevelsSPRYD3;proteinLevelsINPP5D;proteinLevelsPHAX;PhosphositeHMGN1-T70tS89s;PhosphositeDNMT1-S143s;PhosphositePML-S518s;PhosphositeMRE11-S688sS689s;PhosphositeAGFG1-S181s;PhosphositePTPN11-Y62y;PhosphositeMICALL1-S471s;PhosphositeBAZ2A-S509s;PhosphositeHIST1H2BK-S92s;PhosphositeHNRNPC-T247t;Pho…	0.667013	28
Sorafenib	ElasticNet	binaryMutations	binaryMutationsCHD2;binaryMutationsTRANK1;binaryMutationsAQR;binaryMutationsDIAPH1;binaryMutationsDYSF;binaryMutationsTRIO;binaryMutationsSLU7;binaryMutationsBAG3;binaryMutationsNRAS;binaryMutationsKRAS;binaryMutationsKRT14;binaryMutationsSLC4A2;binaryMutationsPC;binaryMutationsFLT3;binaryMutationsMTOR;binaryMutationsCTCF;binaryMutationsLRBA;binaryMutationsGNB1;binaryMutationsMAP1A;binaryMutation…	0.664098	24.8
A-674563	LASSO	proteinLevels	proteinLevelsRTCA;proteinLevelsSOCS2;proteinLevelsBACH1;proteinLevelsCLIC2;proteinLevelsCDK14;proteinLevelsSELL;proteinLevelsAHCY;proteinLevelsBLMH;proteinLevelsLPIN1;proteinLevelsQPRT;proteinLevelsUBE2NL;proteinLevelsC1orf174;proteinLevelsUBE2J2;proteinLevelsPINX1;proteinLevelsNDUFAF3;proteinLevelsSHARPIN;proteinLevelsDENND5A;proteinLevelsSAXO1	0.662844	28.8	organic acid catabolic process,carboxylic acid catabolic process,protein polyubiquitination
Quizartinib (AC220)	LogisticReg	Phosphosite	PhosphositeZNF609-S358s;PhosphositeFMNL1-S184s;PhosphositeMAP1A-S1218s;PhosphositeCCDC88A-S1417s;PhosphositeUIMC1-S653s;PhosphositeSRRM2-S2694s;PhosphositeXPC-S884s;PhosphositeNFIX-S265s;PhosphositeUBR4-S620s;PhosphositeTEX2-S196s;PhosphositeLEMD2-S138sS139s;PhosphositeINPP5D-S960sT963tS971s;PhosphositeMAP1A-S2108s	0.654661	28
PI-103	ElasticNet	mRNALevels;proteinLevels;binaryMutations;Phosphosite	mRNALevelsHLA-DRB1;mRNALevelsFERMT1;mRNALevelsHLA-DQB1;mRNALevelsPDE4A;mRNALevelsRPH3A;mRNALevelsSEC14L5;mRNALevelsCORIN;mRNALevelsPTGIR;mRNALevelsGOLGA6L3;mRNALevelsRELN;mRNALevelsPDCD1LG2;mRNALevelsAL353898.2;mRNALevelsC17orf107;mRNALevelsHSPA8P15;mRNALevelsRP11-383B4.4;mRNALevelsRP11-203B9.4;mRNALevelsRP11-561O23.8;mRNALevelsMTND6P5;mRNALevelsRP11-504P24.3;mRNALevelsRP11-712L6.5;mRNALevelsRP11…	0.629394	29.6
Selumetinib (AZD6244)	ElasticNet	proteinLevels	proteinLevelsBET1;proteinLevelsABCB7;proteinLevelsFLNB;proteinLevelsUBXN7;proteinLevelsANXA5;proteinLevelsSRC;proteinLevelsSPN;proteinLevelsNAGA;proteinLevelsTPP2;proteinLevelsMCM7;proteinLevelsSERPINB6;proteinLevelsNASP;proteinLevelsMSH6;proteinLevelsBDH1;proteinLevelsPTPN12;proteinLevelsCOG2;proteinLevelsPLEC;proteinLevelsTRIP11;proteinLevelsPM20D2;proteinLevelsIFT81;proteinLevelsRTF1;proteinLe…	0.620797	28.8	intraciliary transport involved in cilium assembly,intraciliary transport,transport along microtubule,protein transport along microtubule,microtubule-based protein transport,platelet-derived growth factor receptor-beta signaling pathway,microtubule-based transport,cytoskeleton-dependent intracellular transport,microtubule-based movement
SNS-032 (BMS-387032)	LogisticReg	proteinLevels	proteinLevelsTOMM70;proteinLevelsSHMT1;proteinLevelsCBX5;proteinLevelsARPP19;proteinLevelsRUNX1;proteinLevelsC18orf21;proteinLevelsCCDC58;proteinLevelsNOMO2;proteinLevelsSPRYD4;proteinLevelsNTAN1;proteinLevelsGCC1;proteinLevelsCOA1;proteinLevelsNAA38	0.620788	30.4
Selumetinib (AZD6244)	LASSO	proteinLevels;Phosphosite	proteinLevelsABCB7;proteinLevelsUBXN7;proteinLevelsBCL2;proteinLevelsXRCC1;proteinLevelsTPP2;proteinLevelsMCM7;proteinLevelsSERPINB6;proteinLevelsNASP;proteinLevelsPLEC;proteinLevelsIQSEC1;proteinLevelsIFT81;proteinLevelsRTF1;proteinLevelsFAM129B;proteinLevelsCHCHD2;PhosphositeMYL12B-T19t;PhosphositeLYN-S11sS13s;PhosphositePOU2F2-S55s;PhosphositeSLC2A3-S485s;PhosphositeBCKDHA-S337s;PhosphositePTP…	0.617974	28.8
Flavopiridol	ElasticNet	mRNALevels;proteinLevels;binaryMutations;Phosphosite	mRNALevelsEIF4EBP3;mRNALevelsRPS17;mRNALevelsPIK3R6;mRNALevelsADRB1;mRNALevelsTSNAXIP1;mRNALevelsSMPDL3B;mRNALevelsPEMT;mRNALevelsCCDC146;mRNALevelsNR5A1;mRNALevelsC9orf43;mRNALevelsSNX29P1;mRNALevelsDNAAF3;mRNALevelsRP11-1055B8.7;mRNALevelsRP11-443P15.2;mRNALevelsSPTLC3;mRNALevelsFAM228A;mRNALevelsTMEM232;mRNALevelsDZIP3;mRNALevelsFANK1;mRNALevelsC16orf96;mRNALevelsRPS23P2;mRNALevelsAC055811.5;m…	0.612867	29.6
Sorafenib	LogisticReg	proteinLevels	proteinLevelsTRIM16;proteinLevelsGRK2;proteinLevelsINPP5D;proteinLevelsHTATIP2	0.612709	29.6	negative regulation of striated muscle contraction,positive regulation of catecholamine secretion,positive regulation of B cell differentiation,regulation of granulocyte differentiation,negative regulation of bone resorption,determination of adult lifespan,negative regulation of B cell proliferation,negative regulation of bone remodeling,regulation of retinoic acid receptor signaling pathway,G pr…
A-674563	ElasticNet	proteinLevels;Phosphosite	proteinLevelsRTCA;proteinLevelsCLIC2;proteinLevelsCDK14;proteinLevelsSELL;proteinLevelsJAK1;proteinLevelsAHCY;proteinLevelsRBM3;proteinLevelsQPRT;proteinLevelsUBE2NL;proteinLevelsC1orf174;proteinLevelsKDM1B;proteinLevelsINPP5D;proteinLevelsNDUFAF3;proteinLevelsNDUFAF4;PhosphositeSP100-S191s;PhosphositeEIF4B-S462s;PhosphositeSCRIB-S1561s;PhosphositeMAP7D1-S113sS116s;PhosphositeARMC8-S512s;Phosphos…	0.591119	28.8
Sorafenib	LASSO	binaryMutations	binaryMutationsCHD2;binaryMutationsTRANK1;binaryMutationsAQR;binaryMutationsDYSF;binaryMutationsTRIO;binaryMutationsSLU7;binaryMutationsBAG3;binaryMutationsNRAS;binaryMutationsKRAS;binaryMutationsKRT14;binaryMutationsSLC4A2;binaryMutationsPC;binaryMutationsRFC1;binaryMutationsFLT3;binaryMutationsCTCF;binaryMutationsGNB1;binaryMutationsPRKCE;binaryMutationsEZH2;binaryMutationsNFE2;binaryMutationsW…	0.59082	24.8
GDC-0941	LASSO	proteinLevels;Phosphosite	proteinLevelsMPG;proteinLevelsFLNC;proteinLevelsRASA3;proteinLevelsZNF318;proteinLevelsGCC1;proteinLevelsTBL1XR1;PhosphositePAK2-S141s;PhosphositeIBTK-S1045s	0.57665	28.8
Elesclomol	LASSO	mRNALevels;proteinLevels;binaryMutations;Phosphosite	mRNALevelsNUDT7;mRNALevelsPAPLN;mRNALevelsSLC2A9;mRNALevelsGABBR1;mRNALevelsANXA2P1	0.572453	26.4
SNS-032 (BMS-387032)	ElasticNet	proteinLevels	proteinLevelsSPAG9;proteinLevelsXYLB;proteinLevelsIGHV3-9;proteinLevelsTPT1;proteinLevelsPRG2;proteinLevelsNQO1;proteinLevelsNQO2;proteinLevelsTPSB2;proteinLevelsU2AF2;proteinLevelsDCK;proteinLevelsCBX5;proteinLevelsHNMT;proteinLevelsRUNX1;proteinLevelsFABP5;proteinLevelsATP2B2;proteinLevelsGALNT1;proteinLevelsPDIA5;proteinLevelsRASA3;proteinLevelsCEBPE;proteinLevelsATP2B3;proteinLevelsC18orf21;p…	0.56634	30.4
GDC-0941	ElasticNet	proteinLevels	proteinLevelsTRAPPC13;proteinLevelsAKR1B15;proteinLevelsMAN2B1;proteinLevelsSTX16;proteinLevelsGTPBP6;proteinLevelsRAD21;proteinLevelsTBL1X;proteinLevelsZBED4;proteinLevelsFLNB;proteinLevelsPRPF40A;proteinLevelsSOD2;proteinLevelsMPO;proteinLevelsITGB1;proteinLevelsLAMP2;proteinLevelsIGLL1;proteinLevelsPECAM1;proteinLevelsPOLR2E;proteinLevelsTPP2;proteinLevelsMPG;proteinLevelsPPP1R2;proteinLevelsE…	0.553044	28.8
SNS-032 (BMS-387032)	LASSO	proteinLevels	proteinLevelsIGHV3-9;proteinLevelsF5;proteinLevelsPRG2;proteinLevelsTPSB2;proteinLevelsU2AF2;proteinLevelsDCK;proteinLevelsCBX5;proteinLevelsHNMT;proteinLevelsATP2B2;proteinLevelsPDIA5;proteinLevelsCEBPE;proteinLevelsC18orf21;proteinLevelsESCO2;proteinLevelsNTAN1;proteinLevelsGCC1;proteinLevelsPAWR;proteinLevelsATP11C	0.550629	30.4
Selumetinib (AZD6244)	LASSO	proteinLevels	proteinLevelsBET1;proteinLevelsABCB7;proteinLevelsFLNB;proteinLevelsUBXN7;proteinLevelsANXA5;proteinLevelsSRC;proteinLevelsNAGA;proteinLevelsTPP2;proteinLevelsMCM7;proteinLevelsNASP;proteinLevelsPTPN12;proteinLevelsCOG2;proteinLevelsPLEC;proteinLevelsTRIP11;proteinLevelsPM20D2;proteinLevelsIFT81;proteinLevelsRTF1;proteinLevelsFAM129B;proteinLevelsVPS45;proteinLevelsCD300A;proteinLevelsOARD1;prote…	0.549545	28.8	intraciliary transport involved in cilium assembly,intraciliary transport,protein transport along microtubule,microtubule-based protein transport,platelet-derived growth factor receptor-beta signaling pathway
Cabozantinib	LASSO	proteinLevels	proteinLevelsEBAG9;proteinLevelsRNASET2;proteinLevelsKMT2D;proteinLevelsCLIC2;proteinLevelsUSO1;proteinLevelsTRIM16;proteinLevelsPOLR2M;proteinLevelsGCSH;proteinLevelsFLT3;proteinLevelsHCCS;proteinLevelsMLLT1;proteinLevelsENOSF1;proteinLevelsKDM1B;proteinLevelsSPRYD3;proteinLevelsZCCHC10;proteinLevelsPRRC1;proteinLevelsCDC42SE1;proteinLevelsPOLK;proteinLevelsUSP24;proteinLevelsPOMT2;proteinLevels…	0.542494	22.4
JNJ-28312141	ElasticNet	proteinLevels;Phosphosite	proteinLevelsEBAG9;proteinLevelsPRPF3;proteinLevelsRNF40;proteinLevelsGK;proteinLevelsEHHADH;proteinLevelsTTC17;proteinLevelsAKT1S1;proteinLevelsC16orf74;proteinLevelsNUDCD1;proteinLevelsDENND2D;proteinLevelsPA2G4;proteinLevelsRIC8B;proteinLevelsSLC35F6;proteinLevelsTNS1;PhosphositeAGPS-S65s;PhosphositeSRGAP2-S206s;PhosphositeMED24-S873s;PhosphositePSIP1-S118s;PhosphositeMRE11-S688sS689s;Phosphos…	0.541429	25.6
GDC-0941	LASSO	proteinLevels	proteinLevelsMPG;proteinLevelsFLNC;proteinLevelsRASA3;proteinLevelsZNF318;proteinLevelsGCC1;proteinLevelsTBL1XR1	0.537426	28.8
PI-103	LASSO	proteinLevels	proteinLevelsLIPT2;proteinLevelsE2F3;proteinLevelsSTX16;proteinLevelsKMT2D;proteinLevelsLSM1;proteinLevelsLBP;proteinLevelsALDH1B1;proteinLevelsTMF1;proteinLevelsSP3;proteinLevelsTLE3;proteinLevelsTNIP1;proteinLevelsRASA2;proteinLevelsC18orf21;proteinLevelsDNLZ;proteinLevelsZNF787;proteinLevelsHMBOX1;proteinLevelsPIK3AP1;proteinLevelsRHEX;proteinLevelsALDH16A1;proteinLevelsPAWR;proteinLevelsRAB34…	0.535455	29.6
Elesclomol	ElasticNet	mRNALevels	mRNALevelsPPP1R3G;mRNALevelsUQCRQ;mRNALevelsSART1;mRNALevelsGPAA1;mRNALevelsAKR7A2;mRNALevelsNDUFA2;mRNALevelsATP5H;mRNALevelsECD;mRNALevelsCYC1;mRNALevelsFBP1;mRNALevelsCOX6C;mRNALevelsNUDT7;mRNALevelsANXA8;mRNALevelsDES;mRNALevelsGM2A;mRNALevelsCOX5A;mRNALevelsAGA;mRNALevelsFDXR;mRNALevelsS100A4;mRNALevelsPPP1CC;mRNALevelsECI1;mRNALevelsGALK1;mRNALevelsALDH3A2;mRNALevelsSLC25A11;mRNALevelsSLC25…	0.534745	16.8	ATP metabolic process,oxidative phosphorylation,mitochondrial ATP synthesis coupled proton transport,energy coupled proton transport, down electrochemical gradient,ATP synthesis coupled proton transport,monocarboxylic acid catabolic process,negative regulation of lipase activity,mitochondrial ATP synthesis coupled electron transport,ATP synthesis coupled electron transport,proton transmembrane tr…
Selumetinib (AZD6244)	LASSO	mRNALevels;proteinLevels;binaryMutations;Phosphosite	mRNALevelsRNF144A;mRNALevelsRP4-791C19.1;mRNALevelsRP11-262H14.5;mRNALevelsRP11-197N18.2;mRNALevelsLA16c-321D4.2;proteinLevelsABCB7;proteinLevelsUBXN7;proteinLevelsBCL2;proteinLevelsXRCC1;proteinLevelsMCM7;proteinLevelsSERPINB6;proteinLevelsPLEC;proteinLevelsC16orf54;proteinLevelsRTF1;proteinLevelsPDLIM2;proteinLevelsFAM129B;proteinLevelsTBC1D10A;proteinLevelsVPS45;proteinLevelsCD300A;proteinLeve…	0.533488	28.8
17-AAG (Tanespimycin)	ElasticNet	proteinLevels	proteinLevelsSMAP;proteinLevelsKMT2D;proteinLevelsUQCR11;proteinLevelsYY2;proteinLevelsTHAP12;proteinLevelsATP9B;proteinLevelsGOSR1;proteinLevelsZBTB7A;proteinLevelsSULT1A3;proteinLevelsKIT;proteinLevelsGNB3;proteinLevelsMPG;proteinLevelsCASP2;proteinLevelsEIF1AX;proteinLevelsSULT1A1;proteinLevelsMFAP1;proteinLevelsCRADD;proteinLevelsFOXK1;proteinLevelsMLLT1;proteinLevelsMVK;proteinLevelsZNF460;p…	0.530746	30.4
PI-103	LogisticReg	mRNALevels;proteinLevels;binaryMutations;Phosphosite	proteinLevelsKANSL1;proteinLevelsZNF654;PhosphositeTLE3-T321t;PhosphositeCTR9-S1037sS1039sS1041s	0.522233	29.6
Selumetinib (AZD6244)	ElasticNet	mRNALevels;proteinLevels;binaryMutations;Phosphosite	mRNALevelsSCAMP1;mRNALevelsABCB7;mRNALevelsCDK14;mRNALevelsMSH2;mRNALevelsLSM11;mRNALevelsFIGNL1;mRNALevelsSPICE1;mRNALevelsTTC39C;mRNALevelsMETTL21A;mRNALevelsGLMN;mRNALevelsGFI1;mRNALevelsDMXL1;mRNALevelsDYNC2LI1;mRNALevelsEFHC1;mRNALevelsTSGA10;mRNALevelsRNF144A;mRNALevelsGRAMD3;mRNALevelsDEPDC4;mRNALevelsTCTN2;mRNALevelsFANCB;mRNALevelsABHD17AP5;mRNALevelsATP6AP1L;mRNALevelsMIR186;mRNALevelsP…	0.521662	28.8
GDC-0941	ElasticNet	mRNALevels;proteinLevels;binaryMutations;Phosphosite	mRNALevelsPRKD3;mRNALevelsPLEKHG6;mRNALevelsWWC2;mRNALevelsHSP90AA6P;mRNALevelsFOXD4L1;mRNALevelsSLC2A3P2;mRNALevelsRNVU1-13;mRNALevelsRP11-12M9.4;mRNALevelsIQCB2P;mRNALevelsRP11-563N6.6;mRNALevelsVIM-AS1;mRNALevelsSLC16A6P1;mRNALevelsAP000344.3;mRNALevelsHMGN2P28;mRNALevelsRP11-584P21.4;mRNALevelsKLHL2P1;mRNALevelsHNRNPKP1;mRNALevelsRP11-849H4.4;mRNALevelsSNORD119;mRNALevelsRP11-582J16.5;mRNALev…	0.51998	28.8
Selumetinib (AZD6244)	ElasticNet	binaryMutations	binaryMutationsTRANK1;binaryMutationsNKRF;binaryMutationsAQR;binaryMutationsUSO1;binaryMutationsSF3B1;binaryMutationsIDH1;binaryMutationsSLU7;binaryMutationsKRAS;binaryMutationsTP53;binaryMutationsSLC4A2;binaryMutationsNPM1;binaryMutationsMTOR;binaryMutationsSTT3A;binaryMutationsCPT1A;binaryMutationsLRBA;binaryMutationsJAK3;binaryMutationsGNB1;binaryMutationsGTF2I;binaryMutationsMAP1A;binaryMutat…	0.518901	24	regulation of glycogen biosynthetic process,regulation of glucan biosynthetic process,regulation of lipid catabolic process,response to radiation,regulation of cellular carbohydrate metabolic process,regulation of glycogen metabolic process,regulation of polysaccharide biosynthetic process,cellular polysaccharide biosynthetic process
Flavopiridol	ElasticNet	mRNALevels	mRNALevelsSPAG7;mRNALevelsHARS;mRNALevelsPCBD2;mRNALevelsAMT;mRNALevelsDNAAF3;mRNALevelsITFG3;mRNALevelsDZIP3;mRNALevelsRPS23P2;mRNALevelsRP11-458F8.2;mRNALevelsAC005224.2;mRNALevelsEIF3EP1;mRNALevelsBTF3P8;mRNALevelsRP11-488C13.1;mRNALevelsRPL21P116;mRNALevelsRP11-1018J11.1;mRNALevelsEIF4BP5;mRNALevelsRP11-1096G20.5;mRNALevelsCTC-429L19.3	0.515939	16	serine family amino acid catabolic process,cellular amino acid metabolic process,pteridine-containing compound biosynthetic process,glycine metabolic process,diol biosynthetic process,motile cilium assembly,diol metabolic process,axonemal dynein complex assembly,pteridine-containing compound metabolic process,serine family amino acid metabolic process,tRNA aminoacylation for protein translation,t…
PI-103	ElasticNet	proteinLevels	proteinLevelsLIPT2;proteinLevelsE2F3;proteinLevelsSTX16;proteinLevelsKMT2D;proteinLevelsBACH1;proteinLevelsLSM1;proteinLevelsKDM6A;proteinLevelsHNRNPR;proteinLevelsAP1G1;proteinLevelsLANCL1;proteinLevelsC21orf2;proteinLevelsATP9B;proteinLevelsZEB2;proteinLevelsSTX10;proteinLevelsUSO1;proteinLevelsFLNB;proteinLevelsTACC1;proteinLevelsZBTB7A;proteinLevelsPOLR1A;proteinLevelsMT-ATP6;proteinLevelsIGL…	0.511515	29.6
Cabozantinib	ElasticNet	proteinLevels	proteinLevelsEBAG9;proteinLevelsRNASET2;proteinLevelsKMT2D;proteinLevelsCLIC2;proteinLevelsSURF4;proteinLevelsUSO1;proteinLevelsTRIM16;proteinLevelsPOLR2M;proteinLevelsGCSH;proteinLevelsFLT3;proteinLevelsHCCS;proteinLevelsVCP;proteinLevelsMLLT1;proteinLevelsLRRC41;proteinLevelsENOSF1;proteinLevelsKDM1B;proteinLevelsSPRYD3;proteinLevelsZCCHC10;proteinLevelsINPP5D;proteinLevelsFAF2;proteinLevelsPRR…	0.506014	22.4
SNS-032 (BMS-387032)	LogisticReg	mRNALevels	mRNALevelsREPS1;mRNALevelsEIF3C;mRNALevelsPSRC1;mRNALevelsMB21D1;mRNALevelsPDCD1LG2;mRNALevelsAC005014.5	0.504119	20
JQ1	LogisticReg	binaryMutations	binaryMutationsC5orf51;binaryMutationsRAD21;binaryMutationsURB1;binaryMutationsAQR;binaryMutationsITGB5;binaryMutationsRFC1;binaryMutationsMYH11;binaryMutationsMAP1B;binaryMutationsPOLE;binaryMutationsCDK13;binaryMutationsWDR36;binaryMutationsPASK;binaryMutationsTELO2;binaryMutationsST14;binaryMutationsNLRP1;binaryMutationsNFE2L3;binaryMutationsIL12RB1;binaryMutationsUGGT2;binaryMutationsTSNAXIP1…	0.5	12.2
Trametinib (GSK1120212)	LogisticReg	binaryMutations	binaryMutationsSF3B1;binaryMutationsKRAS;binaryMutationsTP53;binaryMutationsRUNX1;binaryMutationsTLN2;binaryMutationsDNMT3A;binaryMutationsCSF3R;binaryMutationsFAM194A	0.498881	25.6	positive regulation of cell aging,aging,regulation of cellular senescence,regulation of cell aging,cellular senescence,response to radiation,hematopoietic stem cell differentiation
Elesclomol	LASSO	mRNALevels	mRNALevelsECD;mRNALevelsNUDT7;mRNALevelsSLC25A11;mRNALevelsALKBH5;mRNALevelsNEDD4L;mRNALevelsITFG1;mRNALevelsCYB5D2;mRNALevelsPHLDA3;mRNALevelsCDKN2AIPNLP1;mRNALevelsRNLS;mRNALevelsCLEC9A;mRNALevelsCCDC13;mRNALevelsLINC00926;mRNALevelsRP11-567J20.3;mRNALevelsIMPDH1P6;mRNALevelsAC099522.2;mRNALevelsRP11-1018J11.1;mRNALevelsVDAC3P1;mRNALevelsRP11-245G13.2	0.498078	16.8
Gilteritinib (ASP-2215)	ElasticNet	binaryMutations	binaryMutationsRAD21;binaryMutationsAQR;binaryMutationsNRAS;binaryMutationsSTT3A;binaryMutationsLRBA;binaryMutationsSTAT5B;binaryMutationsMAP1A;binaryMutationsKMT2A;binaryMutationsNFX1;binaryMutationsATM;binaryMutationsRASA2;binaryMutationsTBC1D9B;binaryMutationsTAF1L;binaryMutationsMYO18A;binaryMutationsMED12;binaryMutationsCENPK;binaryMutationsANAPC1;binaryMutationsSCAF1;binaryMutationsKAT8;bin…	0.493162	9.2
PI-103	LogisticReg	binaryMutations	binaryMutationsAQR;binaryMutationsMYH11;binaryMutationsPTPN11;binaryMutationsWDR36;binaryMutationsTELO2;binaryMutationsNFE2L3;binaryMutationsKAT2B;binaryMutationsLRRC6;binaryMutationsODF1;binaryMutationsANO3;binaryMutationsAZGP1;binaryMutationsSPANXD	0.48587	24.8	anatomical structure homeostasis
A-674563	LASSO	mRNALevels;proteinLevels;binaryMutations;Phosphosite	proteinLevelsCLIC2;proteinLevelsSELL;proteinLevelsJAK1;proteinLevelsQPRT;proteinLevelsUBE2NL;proteinLevelsNANP;proteinLevelsNDUFAF3;PhosphositeSP100-S191s;PhosphositeARMC8-S512s;PhosphositeUIMC1-S653s;PhosphositeABI2-S368s;PhosphositeOTUD7B-S464sS467s	0.484755	28.8
Cabozantinib	ElasticNet	mRNALevels;proteinLevels;binaryMutations;Phosphosite	mRNALevelsMAP1LC3B2;mRNALevelsME1;mRNALevelsNPC1L1;mRNALevelsAREG;mRNALevelsCD80;mRNALevelsITGA11;mRNALevelsDUSP5;mRNALevelsPADI3;mRNALevelsTMEM163;mRNALevelsCYSLTR2;mRNALevelsABCA9;mRNALevelsFAM71A;mRNALevelsATF3;mRNALevelsSPATA12;mRNALevelsKRT81;mRNALevelsRP11-755B10.3;mRNALevelsSOCS2-AS1;mRNALevelsLINC00989;mRNALevelsCCL3L3;mRNALevelsCTD-2262B20.1;mRNALevelsCTA-29F11.1;mRNALevelsRP11-258F1.1;m…	0.483823	22.4
17-AAG (Tanespimycin)	LASSO	proteinLevels	proteinLevelsMPG;proteinLevelsHSDL1;proteinLevelsZNF787;proteinLevelsPDRG1;proteinLevelsAGAP2	0.479231	30.4	base-excision repair, AP site formation,DNA dealkylation involved in DNA repair,positive regulation of phospholipid biosynthetic process
GDC-0941	ElasticNet	proteinLevels;Phosphosite	proteinLevelsGTPBP6;proteinLevelsTBL1X;proteinLevelsZBED4;proteinLevelsFLNB;proteinLevelsSOD2;proteinLevelsMPG;proteinLevelsCEBPA;proteinLevelsMFAP1;proteinLevelsNUCB2;proteinLevelsSRSF2;proteinLevelsFABP5;proteinLevelsMVK;proteinLevelsFLNC;proteinLevelsRASA3;proteinLevelsTRIP10;proteinLevelsNFE2;proteinLevelsZNF318;proteinLevelsCARMIL1;proteinLevelsSLC30A6;proteinLevelsTLK2;proteinLevelsCHD1L;pr…	0.469324	28.8
Venetoclax	LogisticReg	proteinLevels;Phosphosite	proteinLevelsGNPDA1;proteinLevelsPTPRJ;proteinLevelsTSPAN14;proteinLevelsSH3GL1;proteinLevelsMCMBP;proteinLevelsSARDH;proteinLevelsCBLB;PhosphositeGAPDH-S210s;PhosphositeNADK-S48s	0.468333	19.2
A-674563	LASSO	proteinLevels;Phosphosite	proteinLevelsRTCA;proteinLevelsCLIC2;proteinLevelsSELL;proteinLevelsJAK1;proteinLevelsQPRT;proteinLevelsUBE2NL;proteinLevelsNANP;proteinLevelsNDUFAF3;PhosphositeSP100-S191s;PhosphositeARMC8-S512s;PhosphositeUIMC1-S653s;PhosphositeABI2-S368s	0.464196	28.8
Ponatinib (AP24534)	ElasticNet	proteinLevels	proteinLevelsDDX39A;proteinLevelsXPO1;proteinLevelsPMM2;proteinLevelsEIF3D;proteinLevelsRIPK2;proteinLevelsPRKRA;proteinLevelsTRIM16;proteinLevelsNR2C1;proteinLevelsSPN;proteinLevelsPIK3CA;proteinLevelsTHOP1;proteinLevelsHCCS;proteinLevelsADK;proteinLevelsEIF3B;proteinLevelsSLC35A1;proteinLevelsRBM3;proteinLevelsEIF3I;proteinLevelsRUNX3;proteinLevelsPSMD5;proteinLevelsMAPKAPK3;proteinLevelsATP2B3…	0.450303	27.2	formation of cytoplasmic translation initiation complex
GDC-0941	LASSO	mRNALevels;proteinLevels;binaryMutations;Phosphosite	mRNALevelsWWC2;mRNALevelsSLC2A3P2;mRNALevelsRNVU1-13;mRNALevelsRP11-12M9.4;mRNALevelsRP11-563N6.6;mRNALevelsRP11-584P21.4;mRNALevelsHNRNPKP1;mRNALevelsTEN1-CDK3;proteinLevelsMPG;proteinLevelsSRSF2;proteinLevelsFLNC;proteinLevelsGCC1;PhosphositePDLIM1-S90s;PhosphositeASXL2-S224s;PhosphositeBAZ1B-S347s;PhosphositeSAP30L-S99sT104t	0.442964	28.8
Flavopiridol	LogisticReg	Phosphosite	PhosphositeN4BP1-T242t;PhosphositeSTMN1-S25s;PhosphositeTMPO-T160t;PhosphositeRAB27A-S206s;PhosphositeTP53BP1-S659sS660sS662s;PhosphositeCEP135-S303s;PhosphositeMARK2-T467t;PhosphositeCDC42EP3-S144s;PhosphositeRPS6KA4-S721s;PhosphositeRPS27A-S20s;PhosphositeBAP1-Y401y;PhosphositePOLR2A-T1919t;PhosphositeTEX2-T225t	0.441127	29.6
PI-103	LogisticReg	proteinLevels	proteinLevelsKMT2D;proteinLevelsKANSL1;proteinLevelsCDV3;proteinLevelsZNF654	0.440592	29.6	positive regulation of intracellular estrogen receptor signaling pathway,peptidyl-lysine modification,positive regulation of intracellular steroid hormone receptor signaling pathway,histone H4-K5 acetylation,histone H4-K8 acetylation,histone modification,covalent chromatin modification,histone H4-K16 acetylation,histone H3-K4 trimethylation,peptidyl-lysine dimethylation,beta-catenin-TCF complex a…
Selumetinib (AZD6244)	LASSO	binaryMutations	binaryMutationsNKRF;binaryMutationsSF3B1;binaryMutationsSLU7;binaryMutationsKRAS;binaryMutationsTP53;binaryMutationsNPM1;binaryMutationsMTOR;binaryMutationsSTT3A;binaryMutationsJAK3;binaryMutationsCTTN;binaryMutationsUBE2J2;binaryMutationsNCOA7;binaryMutationsRAD51AP1;binaryMutationsWDR7;binaryMutationsTLN2;binaryMutationsDNMT3A;binaryMutationsFAM65C;binaryMutationsSUCO;binaryMutationsPPP1R13L;bi…	0.438055	24	response to radiation
Selumetinib (AZD6244)	ElasticNet	mRNALevels	mRNALevelsCDK14;mRNALevelsRARA;mRNALevelsNAA10;mRNALevelsLMAN1;mRNALevelsLIG3;mRNALevelsHNRNPK;mRNALevelsPLEC;mRNALevelsIQSEC1;mRNALevelsSPICE1;mRNALevelsCEP120;mRNALevelsDNAJC19;mRNALevelsZNF668;mRNALevelsFAM129B;mRNALevelsGFI1;mRNALevelsSH3GL1;mRNALevelsDDA1;mRNALevelsTBC1D10A;mRNALevelsAK3;mRNALevelsRCL1;mRNALevelsDMXL1;mRNALevelsZNF207;mRNALevelsFAM65A;mRNALevelsREXO1;mRNALevelsEFHC1;mRNALeve…	0.437853	19.2
Panobinostat	ElasticNet	mRNALevels;proteinLevels;binaryMutations;Phosphosite	mRNALevelsLPIN1;mRNALevelsHEPH;mRNALevelsCHD5;mRNALevelsCPXM1;mRNALevelsCRISPLD1;mRNALevelsMYO5C;mRNALevelsPSD2;mRNALevelsHESX1;mRNALevelsAGBL2;mRNALevelsC20orf197;mRNALevelsC15orf56;mRNALevelsGATSL1;mRNALevelsTTC24;mRNALevelsLDLRAD2;mRNALevelsTRBV20-1;mRNALevelsTNFRSF25;mRNALevelsRP13-297E16.4;mRNALevelsRP11-441O15.3;mRNALevelsRP4-794H19.4;mRNALevelsDIRC3;mRNALevelsRP11-517P14.7;mRNALevelsRP11-2…	0.437143	12.8
Sorafenib	ElasticNet	Phosphosite	PhosphositeMEFV-S187s;PhosphositeZFC3H1-S1046s;PhosphositeDIAPH1-T1256t;PhosphositePSIP1-S129s;PhosphositeSASH3-S34sS38sS42s;PhosphositeFMNL1-S184s;PhosphositeMBP-S26s;PhosphositeHSPB1-S78s;PhosphositeEPRS-S1000s;PhosphositeEIF4B-S497sS498s;PhosphositeDNMT1-S143s;PhosphositeDNMT1-S22s;PhosphositeHELZ-S1764sS1766s;PhosphositeGSK3B-S9s;PhosphositeMRE11-S688sS689s;PhosphositeMAP1A-S667s;PhosphositeM…	0.431515	24.4
GDC-0941	ElasticNet	mRNALevels	mRNALevelsSPINT1;mRNALevelsAP5Z1;mRNALevelsZNF217;mRNALevelsIMPA1;mRNALevelsPPOX;mRNALevelsBCAP31;mRNALevelsNFKB2;mRNALevelsSRSF5;mRNALevelsNEDD9;mRNALevelsNDUFAF6;mRNALevelsPSMG4;mRNALevelsLAIR1;mRNALevelsNADSYN1;mRNALevelsGRAMD4;mRNALevelsJADE1;mRNALevelsWASH2P;mRNALevelsTSPAN14;mRNALevelsSETD7;mRNALevelsHDAC10;mRNALevelsRBKS;mRNALevelsPARVG;mRNALevelsVPS29;mRNALevelsNLRC3;mRNALevelsCOL4A5;mRNA…	0.425298	18.4
Foretinib (XL880)	LogisticReg	proteinLevels	proteinLevelsMCRIP1;proteinLevelsANKRD28;proteinLevelsCLIC2;proteinLevelsMAFG;proteinLevelsACP2;proteinLevelsRBPJ;proteinLevelsPSMD5;proteinLevelsGPAT3;proteinLevelsSPRYD3;proteinLevelsINPP5D;proteinLevelsPPP1R14B;proteinLevelsGMPR2;proteinLevelsAKIRIN2	0.420638	29.6
Elesclomol	ElasticNet	mRNALevels;proteinLevels;binaryMutations;Phosphosite	mRNALevelsNUDT7;mRNALevelsANXA8;mRNALevelsPLOD1;mRNALevelsNEDD4L;mRNALevelsPAPLN;mRNALevelsSLC2A9;mRNALevelsNID1;mRNALevelsSRCRB4D;mRNALevelsANXA8L1;mRNALevelsLDHD;mRNALevelsPHLDA3;mRNALevelsBDNF;mRNALevelsRNLS;mRNALevelsANXA8L2;mRNALevelsGABBR1;mRNALevelsANXA2P1;mRNALevelsLY86-AS1;mRNALevelsRP1-13D10.2;mRNALevelsAC079767.4;mRNALevelsIMMTP1;mRNALevelsAC108059.1;mRNALevelsCTD-2033D24.2;mRNALevelsX…	0.418009	26.4
Cabozantinib	ElasticNet	proteinLevels;Phosphosite	proteinLevelsKMT2D;proteinLevelsCLIC2;proteinLevelsUSO1;proteinLevelsMBD4;proteinLevelsTRIM16;proteinLevelsGCSH;proteinLevelsFLT3;proteinLevelsHCCS;proteinLevelsSPRYD3;proteinLevelsINPP5D;proteinLevelsPRRC1;proteinLevelsCDC42SE1;proteinLevelsUSP24;proteinLevelsMATR3;proteinLevelsWASH6P;PhosphositeKMT2D-S2726s;PhosphositeMDH1-S241s;PhosphositeRPL34-S12s;PhosphositeSEC61B-S17s;PhosphositeARHGEF6-S1…	0.413473	22.4
Dovitinib (CHIR-258)	LogisticReg	proteinLevels	proteinLevelsPRKRA;proteinLevelsPECAM1;proteinLevelsPOLR2C;proteinLevelsINPP5D;proteinLevelsSFXN2;proteinLevelsDENND3	0.410845	22.4
PI-103	LogisticReg	proteinLevels;Phosphosite	proteinLevelsKMT2D;proteinLevelsKANSL1;proteinLevelsCDV3;proteinLevelsZNF654;PhosphositeTLE3-T321t;PhosphositeCTR9-S1037sS1039sS1041s	0.406181	29.6
Panobinostat	LogisticReg	Phosphosite	PhosphositeNADK-S64s;PhosphositeLSP1-S130s;PhosphositeRCSD1-S242sS244s;PhosphositeTEX2-T225t;PhosphositeSYTL1-S159s;PhosphositeASAP1-S1041s;PhosphositeCAST-S425s;PhosphositeLSP1-T175tS177sT184t;PhosphositeSUB1-S15sS17sS19s;PhosphositePTPN12-T519t	0.402892	12.8
JQ1	ElasticNet	proteinLevels	proteinLevelsZER1;proteinLevelsATG4C;proteinLevelsVPS33B;proteinLevelsRGCC;proteinLevelsCARS2;proteinLevelsSTAB1;proteinLevelsFIS1;proteinLevelsCCDC196	0.40165	11.6
Cabozantinib	LASSO	mRNALevels;proteinLevels;binaryMutations;Phosphosite	proteinLevelsEBAG9;proteinLevelsKMT2D;proteinLevelsCLIC2;proteinLevelsTRIM16;proteinLevelsGCSH;proteinLevelsHCCS;proteinLevelsENOSF1;proteinLevelsSPRYD3;proteinLevelsINPP5D;proteinLevelsCDC42SE1;PhosphositeSEC61B-S17s;PhosphositeMAP1A-S1675s;PhosphositeKMT2A-S183s;PhosphositeARHGEF6-S124s;PhosphositeCAMSAP1-S563s;PhosphositeMAP1S-S592s;PhosphositeAPBB1IP-S525s;PhosphositeMICALL1-S471s;Phosphosite…	0.398928	22.4
Quizartinib (AC220)	LASSO	proteinLevels	proteinLevelsEBAG9;proteinLevelsCLIC2;proteinLevelsPRKRA;proteinLevelsFLT3;proteinLevelsSULT1A1;proteinLevelsCRADD;proteinLevelsMLLT1;proteinLevelsGAMT;proteinLevelsGPAT3;proteinLevelsETFRF1;proteinLevelsSETD3;proteinLevelsINPP5D;proteinLevelsMKL1;proteinLevelsPCMTD1;proteinLevelsNACC1;proteinLevelsPHAX;proteinLevelsGFOD1;proteinLevelsSNAPC2;proteinLevelsPSG6	0.396537	28
Flavopiridol	LASSO	mRNALevels;proteinLevels;binaryMutations;Phosphosite	mRNALevelsTSNAXIP1;mRNALevelsPEMT;mRNALevelsC9orf43;mRNALevelsDNAAF3;mRNALevelsRPS23P2;mRNALevelsAC005224.2;mRNALevelsRP11-1096G20.5;proteinLevelsEZR;proteinLevelsDIP2A;proteinLevelsMGA;proteinLevelsTSPAN14;proteinLevelsWDR70;proteinLevelsSTX18;PhosphositeSNRPA1-S197s;PhosphositeCDK2-Y19y;PhosphositeTMPO-T160t;PhosphositeKIAA1143-S116s;PhosphositePOU2F2-S303s;PhosphositeGOLPH3-S42s;PhosphositeMCM…	0.393333	24.6
17-AAG (Tanespimycin)	LASSO	binaryMutations	binaryMutationsBAG3;binaryMutationsNRAS;binaryMutationsKRT14;binaryMutationsPC;binaryMutationsJAK3;binaryMutationsGNB1;binaryMutationsPTPN11;binaryMutationsCOX18;binaryMutationsKIF20B;binaryMutationsTBC1D10A;binaryMutationsINCENP;binaryMutationsTLN2;binaryMutationsCEACAM6;binaryMutationsPLEKHG2;binaryMutationsDTX1;binaryMutationsFAM194A;binaryMutationsBMPER;binaryMutationsMYO7B	0.38967	25.6	regulation of cell-cell adhesion,positive regulation of cell-cell adhesion,negative regulation of cell adhesion,microvillus organization,intermediate filament organization
Panobinostat	ElasticNet	Phosphosite	PhosphositeDDX3X-S619s;PhosphositeKMT2D-S2274s;PhosphositeBRD4-S1128s;PhosphositeFLNB-S1505s;PhosphositeCCNK-S340s;PhosphositeSASH3-S34sS38sS42s;PhosphositeSTK10-S450sS454s;PhosphositeSTK10-S454s;PhosphositeSTK10-T952t;PhosphositePAK4-S181s;PhosphositeARAF-S186s;PhosphositePPP3CB-S478s;PhosphositeEIF4B-S359s;PhosphositeMCM4-S142s;PhosphositeEVI2B-S268sS271s;PhosphositeSTAT3-S727s;PhosphositeNAA10…	0.385714	12.8
BEZ235	ElasticNet	mRNALevels	mRNALevelsBECN1;mRNALevelsUNC13A;mRNALevelsEDEM1;mRNALevelsPELI2;mRNALevelsCTB-134H23.2;mRNALevelsAC068831.10;mRNALevelsAF196972.4;mRNALevelsBCDIN3D-AS1	0.381781	16.2	synaptic vesicle docking,positive regulation of synaptic plasticity,synaptic vesicle maturation,cellular response to nitrogen starvation,cellular response to nitrogen levels,regulation of attachment of spindle microtubules to kinetochore,regulation of retrograde protein transport, ER to cytosol,attachment of mitotic spindle microtubules to kinetochore,regulation of short-term neuronal synaptic pl…
PI-103	LASSO	mRNALevels;proteinLevels;binaryMutations;Phosphosite	mRNALevelsRELN;mRNALevelsRP11-203B9.4;mRNALevelsRP11-707O23.5;proteinLevelsLIPT2;proteinLevelsKMT2D;proteinLevelsAP1G1;proteinLevelsFLNB;proteinLevelsTLE3;proteinLevelsRGCC;proteinLevelsCDV3;PhosphositeTCEA1-S114s;PhosphositeTMPO-S66sS67sT74t;PhosphositeTLE3-S286s;PhosphositeKIAA0930-S362s;PhosphositeTCF20-T1671t;PhosphositePCIF1-S159s;PhosphositeIVNS1ABP-T272t;PhosphositeCIZ1-T202t;PhosphositeLY…	0.379394	29.6
Cabozantinib	ElasticNet	binaryMutations	binaryMutationsCHD2;binaryMutationsTRANK1;binaryMutationsNKRF;binaryMutationsSART1;binaryMutationsAKAP8;binaryMutationsZNF292;binaryMutationsAQR;binaryMutationsUSO1;binaryMutationsSF3B1;binaryMutationsTRIO;binaryMutationsSLU7;binaryMutationsH6PD;binaryMutationsSEC24A;binaryMutationsA2M;binaryMutationsNRAS;binaryMutationsKRAS;binaryMutationsKRT14;binaryMutationsTP53;binaryMutationsSLC4A2;binaryMut…	0.378362	18.8
SNS-032 (BMS-387032)	ElasticNet	mRNALevels	mRNALevelsSNAP29;mRNALevelsEPX;mRNALevelsFBN1;mRNALevelsZNF79;mRNALevelsKYNU;mRNALevelsWASH2P;mRNALevelsDHRSX;mRNALevelsDNAJA4;mRNALevelsTTC9;mRNALevelsUBE2F;mRNALevelsCERS2;mRNALevelsPRR11;mRNALevelsSUCLG2;mRNALevelsDCAF5;mRNALevelsGORASP1;mRNALevelsPARVG;mRNALevelsTXNRD2;mRNALevelsCYTH4;mRNALevelsAGO1;mRNALevelsCDC25C;mRNALevelsCYHR1;mRNALevelsMED22;mRNALevelsANGEL1;mRNALevelsMAGIX;mRNALevelsCO…	0.377715	16.2
PP242	ElasticNet	Phosphosite	PhosphositeSCAMP2-S319s;PhosphositeLMNA-S458s;PhosphositeLMNA-S429s;PhosphositeAKT1-T308t;PhosphositeAKT2-T309t;PhosphositeRPL30-S10s;PhosphositeRUNX1-T14tT18t;PhosphositeTLE3-S286s;PhosphositeR3HDM1-S261s;PhosphositeMAP7D1-S113sS116s;PhosphositeTBC1D10B-T154t;PhosphositeTOR1AIP1-T147t;PhosphositeEEPD1-S16sS19s;PhosphositeRALGPS2-T361t;PhosphositeRASAL3-S988s;PhosphositeLPIN2-S303s;PhosphositeNDR…	0.371142	29.6
PP242	LASSO	Phosphosite	PhosphositeLMNA-S458s;PhosphositeLMNA-S429s;PhosphositeRUNX1-T14tT18t;PhosphositeMAP7D1-S113sS116s;PhosphositeEEPD1-S16sS19s;PhosphositeRALGPS2-T361t;PhosphositeRASAL3-S988s;PhosphositeANKS1A-S661s;PhosphositeNF1-S2543s	0.361958	29.6
Dovitinib (CHIR-258)	LogisticReg	mRNALevels;proteinLevels;binaryMutations;Phosphosite	mRNALevelsRP11-388P9.2;proteinLevelsINPP5D;proteinLevelsDENND3;PhosphositeMAP1A-S1326s;PhosphositePCM1-S1186sS1187sS1188s;PhosphositeSEH1L-S179s	0.35909	22.4
Dovitinib (CHIR-258)	ElasticNet	binaryMutations	binaryMutationsCHD2;binaryMutationsTRANK1;binaryMutationsAQR;binaryMutationsDIAPH1;binaryMutationsIDH1;binaryMutationsDYSF;binaryMutationsTRIO;binaryMutationsSLU7;binaryMutationsBAG3;binaryMutationsNRAS;binaryMutationsKRAS;binaryMutationsKRT14;binaryMutationsSLC4A2;binaryMutationsPC;binaryMutationsRFC1;binaryMutationsMYH11;binaryMutationsFLT3;binaryMutationsMTOR;binaryMutationsSTT3A;binaryMutatio…	0.357651	18.8
Quizartinib (AC220)	LogisticReg	mRNALevels	mRNALevelsTRIM32;mRNALevelsHOXB5;mRNALevelsFAM92A1P1;mRNALevelsHOXB2;mRNALevelsSKIDA1;mRNALevelsAF064858.6;mRNALevelsRP11-7O11.3	0.354994	17.6	embryonic skeletal system morphogenesis,embryonic skeletal system development,anterior/posterior pattern specification,skeletal system morphogenesis,embryonic organ morphogenesis,regionalization,embryonic organ development,pattern specification process,facial nerve development,cranial nerve structural organization,facial nerve morphogenesis,response to interleukin-17,cellular response to interleu…
BEZ235	LogisticReg	mRNALevels;proteinLevels;binaryMutations;Phosphosite	proteinLevelsGGCT;proteinLevelsITGB1;proteinLevelsCCL5;proteinLevelsCOCH;binaryMutationsSRSF2;PhosphositePCIF1-S140sS144sT150t;PhosphositePHF14-S290sT292t;PhosphositeGYS1-S653s;PhosphositeTEX2-S362s;PhosphositePF4-S48s;PhosphositePF4V1-S51s	0.353553	24.4
Selumetinib (AZD6244)	LASSO	mRNALevels	mRNALevelsCDK14;mRNALevelsDNAJC19;mRNALevelsSH3GL1;mRNALevelsTBC1D10A;mRNALevelsFAM65A;mRNALevelsREXO1;mRNALevelsEFHC1;mRNALevelsOSGIN1;mRNALevelsDEDD;mRNALevelsSLC25A34;mRNALevelsTHAP2;mRNALevelsTMEM150B;mRNALevelsRP11-367E12.4	0.348419	16.2
Quizartinib (AC220)	ElasticNet	proteinLevels	proteinLevelsEBAG9;proteinLevelsCLIC2;proteinLevelsSURF4;proteinLevelsNBN;proteinLevelsPRKRA;proteinLevelsSULT1A1;proteinLevelsVCP;proteinLevelsCRADD;proteinLevelsMLLT1;proteinLevelsQPRT;proteinLevelsETFRF1;proteinLevelsSETD3;proteinLevelsSPRYD3;proteinLevelsINPP5D;proteinLevelsMKL1;proteinLevelsPHAX	0.335844	28
Panobinostat	LogisticReg	proteinLevels;Phosphosite	proteinLevelsCC2D1B;proteinLevelsKDM5B;PhosphositeRCSD1-S242sS244s;PhosphositeASAP1-S1041s;PhosphositeLSP1-T175tS177sT184t;PhosphositeSUB1-S15sS17sS19s;PhosphositePTPN12-T519t	0.334988	12.8
PI-103	LASSO	proteinLevels;Phosphosite	proteinLevelsLIPT2;proteinLevelsKMT2D;proteinLevelsAP1G1;proteinLevelsFLNB;proteinLevelsTLE3;proteinLevelsALDH16A1;proteinLevelsRGCC;proteinLevelsCDV3;PhosphositeTCEA1-S114s;PhosphositeLSP1-S177sS189sS193s;PhosphositeTMPO-S66sS67sT74t;PhosphositeTLE3-S286s;PhosphositeZC3H13-S848sY851yS853s;PhosphositeKIAA0930-S362s;PhosphositeTCF20-T1671t;PhosphositePCIF1-S159s;PhosphositeIVNS1ABP-T272t;Phosphosi…	0.333333	29.6
Flavopiridol	LASSO	Phosphosite	PhosphositeSORBS3-S530s;PhosphositeEPB41-S709s;PhosphositeCDK2-Y19y;PhosphositeTMPO-T160t;PhosphositeGABARAPL2-S10s;PhosphositeTP53BP1-S659sS660sS662s;PhosphositePLEC-T4030t;PhosphositeSYTL3-S231s;PhosphositeGBF1-S1781sS1784s;PhosphositeKIAA1143-S116s;PhosphositeTLK1-S77sT78t;PhosphositeTOP2B-S1340sS1342s;PhosphositePRMT6-T21t;PhosphositeMCM4-S142s;PhosphositeARFGEF2-S1511s;PhosphositeKSR1-T404t	0.32941	29.6
Dovitinib (CHIR-258)	LASSO	proteinLevels;Phosphosite	proteinLevelsBACH1;proteinLevelsPRKRA;proteinLevelsINPP5D;proteinLevelsTMA16;PhosphositeTOR1AIP1-S135sS143s;PhosphositeINPP5D-S1085s;PhosphositeASAP1-S1041s	0.329114	22.4
Cabozantinib	LASSO	proteinLevels;Phosphosite	proteinLevelsEBAG9;proteinLevelsKMT2D;proteinLevelsCLIC2;proteinLevelsTRIM16;proteinLevelsGCSH;proteinLevelsHCCS;proteinLevelsENOSF1;proteinLevelsSPRYD3;proteinLevelsINPP5D;proteinLevelsPHAX;proteinLevelsCDC42SE1;PhosphositeSEC61B-S17s;PhosphositeMAP1A-S1675s;PhosphositeKMT2A-S183s;PhosphositeARHGEF6-S124s;PhosphositeCAMSAP1-S563s;PhosphositeMAP1S-S592s;PhosphositeAPBB1IP-S525s;PhosphositeMICALL1…	0.311795	22.4
A-674563	ElasticNet	mRNALevels;proteinLevels;binaryMutations;Phosphosite	proteinLevelsRTCA;proteinLevelsCLIC2;proteinLevelsCDK14;proteinLevelsSELL;proteinLevelsJAK1;proteinLevelsAHCY;proteinLevelsRBM3;proteinLevelsQPRT;proteinLevelsUBE2NL;proteinLevelsC1orf174;proteinLevelsKDM1B;proteinLevelsINPP5D;proteinLevelsNDUFAF3;proteinLevelsNDUFAF4;PhosphositeSP100-S191s;PhosphositeEIF4B-S462s;PhosphositeSCRIB-S1561s;PhosphositeMAP7D1-S113sS116s;PhosphositeARMC8-S512s;Phosphos…	0.306503	28.8
Selinexor	LogisticReg	binaryMutations	binaryMutationsIDH1;binaryMutationsDYSF;binaryMutationsTRIO;binaryMutationsSTT3A;binaryMutationsWDR7;binaryMutationsTP53;binaryMutationsKIF20B;binaryMutationsTBC1D31;binaryMutationsTET2;binaryMutationsGLDC;binaryMutationsVEPH1;binaryMutationsSLC1A6;binaryMutationsOTOGL;binaryMutationsCSN2	0.302749	9.2
Panobinostat	LASSO	proteinLevels;Phosphosite	proteinLevelsTRIP10;proteinLevelsRAVER1;proteinLevelsSFXN2;proteinLevelsWDR70;proteinLevelsLILRB2;proteinLevelsTM7SF3;PhosphositeARAF-S186s;PhosphositeEIF4G1-T1073t;PhosphositePRKAR1B-S75sT85t;PhosphositeSUB1-S13sS15sS19s;PhosphositeSUB1-S15sS17sS19s;PhosphositePTPN12-T519t;PhosphositePFKFB3-T463tS467s;PhosphositeHNRNPLL-T46t;PhosphositeTMEM245-S16s;PhosphositeTRIM47-S588s;PhosphositeZSWIM8-S1092s	0.301429	12.8
Venetoclax	LASSO	mRNALevels	mRNALevelsMCM9;mRNALevelsRP3-395C13.1;mRNALevelsRP11-98I9.4;mRNALevelsRP11-346D6.6;mRNALevelsRP11-572M11.4;mRNALevelsRP11-1348G14.4;mRNALevelsGOLGA6L21P	0.299988	8.6	protein localization to chromatin,mismatch repair,DNA-dependent DNA replication maintenance of fidelity,interstrand cross-link repair,protein localization to chromosome,DNA duplex unwinding,DNA geometric change,double-strand break repair via homologous recombination,recombinational repair,female gamete generation,DNA-dependent DNA replication,double-strand break repair,DNA replication,DNA recombi…
Quizartinib (AC220)	ElasticNet	binaryMutations	binaryMutationsCHD2;binaryMutationsTRIO;binaryMutationsSLU7;binaryMutationsNRAS;binaryMutationsKRAS;binaryMutationsNPM1;binaryMutationsFLT3;binaryMutationsMTOR;binaryMutationsGNB1;binaryMutationsWDFY4;binaryMutationsRAD51AP1;binaryMutationsSMG1;binaryMutationsANAPC1;binaryMutationsMAST2;binaryMutationsSLC1A6;binaryMutationsCSF3R;binaryMutationsADAMTS7;binaryMutationsAZI1;binaryMutationsDAAM2;bina…	0.299537	24
Foretinib (XL880)	LASSO	binaryMutations	binaryMutationsAQR;binaryMutationsUSO1;binaryMutationsNRAS;binaryMutationsKRAS;binaryMutationsTP53;binaryMutationsNPM1;binaryMutationsGATA2;binaryMutationsMYH11;binaryMutationsFLT3;binaryMutationsCPT1A;binaryMutationsGNB1;binaryMutationsGTF2I;binaryMutationsNFX1;binaryMutationsTLR1;binaryMutationsCENPK;binaryMutationsANAPC1;binaryMutationsZBTB21;binaryMutationsSMC3;binaryMutationsNFATC4;binaryMut…	0.299519	20.6	cellular response to light stimulus,regulation of pri-miRNA transcription by RNA polymerase II,pri-miRNA transcription by RNA polymerase II,cellular response to fatty acid,response to light stimulus,ER overload response,negative regulation of centrosome duplication,cellular response to radiation,negative regulation of centrosome cycle,cellular response to UV,glucose metabolic process,response to …
Dovitinib (CHIR-258)	ElasticNet	mRNALevels;proteinLevels;binaryMutations;Phosphosite	mRNALevelsATP1A4;mRNALevelsSUCLG2;mRNALevelsTTC39A;mRNALevelsBATF3;mRNALevelsSFTPD;mRNALevelsSMAD6;mRNALevelsC16orf45;mRNALevelsOR52K2;mRNALevelsCCDC149;mRNALevelsRP4-784A16.5;mRNALevelsMTND6P5;mRNALevelsMTND1P11;mRNALevelsSUCLG2P2;mRNALevelsAF064858.11;mRNALevelsRP11-338C15.3;proteinLevelsDDX39A;proteinLevelsBACH1;proteinLevelsANKRD28;proteinLevelsCLIC2;proteinLevelsLYRM1;proteinLevelsPRKRA;prot…	0.284848	22.4
Quizartinib (AC220)	LASSO	binaryMutations	binaryMutationsCHD2;binaryMutationsDIAPH1;binaryMutationsTRIO;binaryMutationsSLU7;binaryMutationsNRAS;binaryMutationsKRAS;binaryMutationsNPM1;binaryMutationsRFC1;binaryMutationsFLT3;binaryMutationsGNB1;binaryMutationsWDFY4;binaryMutationsNCOA7;binaryMutationsSMG1;binaryMutationsANAPC1;binaryMutationsPIKFYVE;binaryMutationsTLN2;binaryMutationsMAST2;binaryMutationsSLC1A6;binaryMutationsSUCO;binaryM…	0.284545	24
Staurosporine	LASSO	mRNALevels;proteinLevels;binaryMutations;Phosphosite	mRNALevelsSPIDR;proteinLevelsATG4A;PhosphositePIEZO1-S1646s	0.28	3.2
Staurosporine	LASSO	proteinLevels;Phosphosite	proteinLevelsATG4A;PhosphositeKIF21A-S855s;PhosphositeSLC25A46-S37sT45t;PhosphositePIEZO1-S1646s	0.28	3.2
SNS-032 (BMS-387032)	ElasticNet	mRNALevels;proteinLevels;binaryMutations;Phosphosite	mRNALevelsCYTH4;mRNALevelsTRPS1;mRNALevelsPODNL1;mRNALevelsZNF124;mRNALevelsLNP1;mRNALevelsGOLGA6L18;mRNALevelsPRPF38AP1;mRNALevelsAC104653.1;mRNALevelsPCDHGB4;mRNALevelsSIGLEC20P;mRNALevelsRP1-93H18.7;proteinLevelsTPSB2;proteinLevelsCEBPE;proteinLevelsC18orf21;proteinLevelsNTAN1;PhosphositeSP100-S193s;PhosphositeAKAP17A-S638sT639tS640s;PhosphositeRRAGC-S382s;PhosphositeRAB25-S79s;PhosphositeZNF5…	0.276783	30.4
Foretinib (XL880)	LASSO	proteinLevels	proteinLevelsKMT2D;proteinLevelsCLIC2;proteinLevelsMBD4;proteinLevelsST6GAL1;proteinLevelsVCP;proteinLevelsCRADD;proteinLevelsMLLT1;proteinLevelsRBPJ;proteinLevelsSTAG2;proteinLevelsSPRYD3;proteinLevelsINPP5D;proteinLevelsBSDC1;proteinLevelsPOMT2;proteinLevelsWASH6P	0.276154	29.6	ER-associated misfolded protein catabolic process,cellular response to misfolded protein,response to misfolded protein,protein quality control for misfolded or incompletely synthesized proteins
Venetoclax	LogisticReg	mRNALevels;proteinLevels;binaryMutations;Phosphosite	proteinLevelsGNPDA1;proteinLevelsPTPRJ;proteinLevelsTSPAN14;proteinLevelsSH3GL1;proteinLevelsMCMBP;proteinLevelsSARDH;proteinLevelsCBLB;PhosphositeGAPDH-S210s;PhosphositeNADK-S48s	0.275883	19.2
Venetoclax	LASSO	mRNALevels;proteinLevels;binaryMutations;Phosphosite	proteinLevelsSDCBP;proteinLevelsDPYSL4;proteinLevelsPRKRA;proteinLevelsGSR;proteinLevelsC4A;proteinLevelsC4B;proteinLevelsRRAS;proteinLevelsBLVRB;proteinLevelsSTAT3;proteinLevelsSAFB2;proteinLevelsMCU;proteinLevelsTSPAN14;proteinLevelsDNAJA4;proteinLevelsHSH2D;proteinLevelsMCMBP;proteinLevelsNLRC4;proteinLevelsKIF13B;proteinLevelsENTPD1;PhosphositeCLASP2-S774s;PhosphositeATRX-S925s;PhosphositeRNF…	0.273333	19.2
SNS-032 (BMS-387032)	LASSO	mRNALevels;proteinLevels;binaryMutations;Phosphosite	mRNALevelsCYTH4;mRNALevelsTRPS1;mRNALevelsPODNL1;mRNALevelsRDH16;mRNALevelsZNF124;mRNALevelsLNP1;mRNALevelsGOLGA6L18;mRNALevelsPRPF38AP1;mRNALevelsAC104653.1;mRNALevelsPCDHGB4;mRNALevelsSIGLEC20P;mRNALevelsRP1-93H18.7;proteinLevelsTPSB2;proteinLevelsCEBPE;proteinLevelsNTAN1;PhosphositeSP100-S193s;PhosphositeAKAP17A-S638sT639tS640s;PhosphositeRRAGC-S382s;PhosphositeRAB25-S79s;PhosphositeZNF592-S45…	0.272214	30.4
Flavopiridol	ElasticNet	proteinLevels	proteinLevelsTARSL2;proteinLevelsSORBS3;proteinLevelsNCOR1;proteinLevelsHSPA1A;proteinLevelsEZR;proteinLevelsTPP2;proteinLevelsFHIT;proteinLevelsADCY7;proteinLevelsDIP2A;proteinLevelsAPTX;proteinLevelsMGA;proteinLevelsATPAF2;proteinLevelsMCU;proteinLevelsPIP4K2C;proteinLevelsSFXN5;proteinLevelsNEK7;proteinLevelsRAD50;proteinLevelsIMP4;proteinLevelsSFXN2;proteinLevelsPNKP;proteinLevelsFAM129B;prot…	0.266667	24.6	regulation of telomere capping,positive regulation of telomere maintenance,telomere capping,telomere maintenance via telomerase,spindle organization,regulation of DNA metabolic process,regulation of organelle assembly,DNA biosynthetic process,nucleoside monophosphate phosphorylation,RNA-dependent DNA biosynthetic process,regulation of telomere maintenance,telomere maintenance via telomere lengthe…
Dovitinib (CHIR-258)	LASSO	binaryMutations	binaryMutationsCHD2;binaryMutationsTRANK1;binaryMutationsAQR;binaryMutationsIDH1;binaryMutationsDYSF;binaryMutationsTRIO;binaryMutationsBAG3;binaryMutationsNRAS;binaryMutationsKRAS;binaryMutationsSLC4A2;binaryMutationsCCND3;binaryMutationsFLT3;binaryMutationsSTT3A;binaryMutationsCEBPA;binaryMutationsJAK3;binaryMutationsGNB1;binaryMutationsPRKCE;binaryMutationsPTPN11;binaryMutationsEZH2;binaryMuta…	0.266251	14
A-674563	ElasticNet	Phosphosite	PhosphositeBACH1-S688s;PhosphositeZNF609-S358s;PhosphositeCASC3-S265s;PhosphositeCYTIP-S68s;PhosphositeEIF5B-S511s;PhosphositeDENND4B-S963s;PhosphositeCCNK-S340s;PhosphositeALDOA-T9t;PhosphositePDHA1-S232s;PhosphositeGLUL-S343s;PhosphositeSPN-S351s;PhosphositeSP100-S191s;PhosphositeEIF4B-S462s;PhosphositeITPKB-S204s;PhosphositeABL2-S631s;PhosphositeHTT-S1862s;PhosphositeMKI67-T2502t;PhosphositeST…	0.259557	28.8
Ponatinib (AP24534)	LogisticReg	Phosphosite	PhosphositeKMT2D-S2726s;PhosphositeFMNL1-S184s;PhosphositeZNHIT6-S25s;PhosphositeWWOX-T12tS14s;PhosphositeMIEF1-S55s;PhosphositeUTRN-S1405s;PhosphositePPHLN1-S197sS201s;PhosphositeDOCK10-T1440t;PhosphositeIQSEC1-S109s;PhosphositePFN1-S57s;PhosphositeLRRC41-T327tS330s;PhosphositeSUGP2-S133s;PhosphositeLEO1-S296sT302t;PhosphositeHIST1H3A-T46t;PhosphositeH3F3A-T46t;PhosphositeHIST2H3A-T46t	0.258244	27.2
PI-103	LASSO	Phosphosite	PhosphositeTCEA1-S114s;PhosphositeSP100-S193s;PhosphositeLSP1-S177sS189sS193s;PhosphositeTMPO-S66sS67sT74t;PhosphositePI4KA-S256s;PhosphositeTLE3-S286s;PhosphositePRKCQ-S676s;PhosphositeMAP7D1-S113sS116s;PhosphositeKIAA0930-S362s;PhosphositeJADE1-S703s;PhosphositePPA2-S317s;PhosphositeTCF20-T1671t;PhosphositePCIF1-S159s;PhosphositeIVNS1ABP-T272t;PhosphositeLYST-S2167s;PhosphositeDEPDC5-S1530s	0.254545	29.6
SNS-032 (BMS-387032)	ElasticNet	proteinLevels;Phosphosite	proteinLevelsTPSB2;proteinLevelsCBX5;proteinLevelsPDIA5;proteinLevelsCEBPE;proteinLevelsESCO2;proteinLevelsNTAN1;proteinLevelsGCC1;PhosphositeZNF217-T648t;PhosphositeAKAP17A-S638sT639tS640s;PhosphositeRRAGC-S382s;PhosphositeRAB25-S79s;PhosphositeZNF592-S459sS460s;PhosphositeRTN4-S121sS129s;PhosphositeRBMX-Y214y;PhosphositeRBMXL1-Y214y	0.252448	30.4
Dovitinib (CHIR-258)	ElasticNet	proteinLevels	proteinLevelsMCRIP1;proteinLevelsDDX39A;proteinLevelsBACH1;proteinLevelsANKRD28;proteinLevelsMDM4;proteinLevelsCLIC2;proteinLevelsZBTB24;proteinLevelsLYRM1;proteinLevelsLILRA1;proteinLevelsRBMXL2;proteinLevelsPRKRA;proteinLevelsNPM3;proteinLevelsZFPL1;proteinLevelsTRIM16;proteinLevelsPTBP3;proteinLevelsMB;proteinLevelsKRT8;proteinLevelsCTSL;proteinLevelsUCHL1;proteinLevelsPLA2G2A;proteinLevelsPSM…	0.246061	22.4
Foretinib (XL880)	ElasticNet	mRNALevels;proteinLevels;binaryMutations;Phosphosite	proteinLevelsKMT2D;proteinLevelsCLIC2;proteinLevelsMBD4;proteinLevelsCRADD;proteinLevelsINPP5D;proteinLevelsPOMT2;PhosphositeTCEA1-S114s;PhosphositeDNMT1-S143s;PhosphositeDNMT1-S22s;PhosphositeLRBA-S1133sS1135s;PhosphositeKMT2A-S183s;PhosphositeNCAPD2-S1333s;PhosphositeUBR7-S263sS265s;PhosphositeRTF1-S697s;PhosphositeANKS1A-S661s;PhosphositeRIOK2-T485tS489s;PhosphositeAP1M1-T223t;PhosphositePCIF1…	0.239837	29.6
Flavopiridol	ElasticNet	Phosphosite	PhosphositeDDX3X-S90s;PhosphositeMYL12B-T19t;PhosphositeZNF185-S465sS468s;PhosphositeBNIP3L-S63s;PhosphositeSORBS3-S530s;PhosphositeSRGAP2-S845s;PhosphositeFLNB-S1505s;PhosphositeSF3B1-T207t;PhosphositeLMNA-S458s;PhosphositeLMNA-S404sS407s;PhosphositeLYN-S11sS13s;PhosphositeSNRPA1-S197s;PhosphositeEPB41-S709s;PhosphositeEPB41-S378s;PhosphositePTPN1-S352s;PhosphositeCDK2-Y19y;PhosphositeGTF2F1-S38…	0.239371	29.6
Sorafenib	ElasticNet	proteinLevels;Phosphosite	proteinLevelsSOCS2;proteinLevelsTNPO2;proteinLevelsBACH1;proteinLevelsCLIC2;proteinLevelsLYRM1;proteinLevelsPRKRA;proteinLevelsURI1;proteinLevelsTRIM16;proteinLevelsPOLR2M;proteinLevelsIRF1;proteinLevelsKRT13;proteinLevelsFABP4;proteinLevelsTPSB2;proteinLevelsGCSH;proteinLevelsJAK1;proteinLevelsATP2B4;proteinLevelsMSN;proteinLevelsARL3;proteinLevelsFLT3;proteinLevelsANP32A;proteinLevelsNUDT2;prot…	0.237576	29.6
BEZ235	LASSO	mRNALevels	mRNALevelsCYTIP;mRNALevelsZNF217;mRNALevelsBECN1;mRNALevelsNDFIP2;mRNALevelsPELI2;mRNALevelsCTB-134H23.2;mRNALevelsAC068831.10;mRNALevelsIQCB2P;mRNALevelsAF196972.4;mRNALevelsNFE4;mRNALevelsGAPDHP61;mRNALevelsRP11-849H4.4;mRNALevelsRP11-169D4.2;mRNALevelsRP11-946L16.1;mRNALevelsBCDIN3D-AS1;mRNALevelsAC018766.4;mRNALevelsAC018766.6	0.237066	11.8
INK-128	LASSO	proteinLevels;Phosphosite	proteinLevelsFLNB;proteinLevelsHNMT;proteinLevelsFLNC;proteinLevelsKDM1B;PhosphositeHNRNPA2B1-S318s;PhosphositeSRSF6-S45s;PhosphositeMAP7D1-S113sS116s;PhosphositeINPP5D-S960sT963t;PhosphositeBCL3-S41s;PhosphositeRAB25-S79s;PhosphositePLEC-S2039s	0.235478	30.4
Panobinostat	ElasticNet	mRNALevels	mRNALevelsUBE2E1;mRNALevelsKIAA0141;mRNALevelsCPXM1;mRNALevelsEFHC1;mRNALevelsAGBL2;mRNALevelsC20orf197;mRNALevelsTHBD;mRNALevelsGATSL1;mRNALevelsFAM43A;mRNALevelsBMS1P9;mRNALevelsDIRC3;mRNALevelsRP5-1024G6.2;mRNALevelsAP003068.18;mRNALevelsRP11-986G18.1;mRNALevelsRP11-373D23.3;mRNALevelsAC005618.6	0.233584	6
Venetoclax	ElasticNet	mRNALevels	mRNALevelsGMDS;mRNALevelsLUC7L3;mRNALevelsUCHL3;mRNALevelsL3HYPDH;mRNALevelsQPCTL;mRNALevelsMCM9;mRNALevelsHELZ2;mRNALevelsKLRC1;mRNALevelsSPAG8;mRNALevelsZNF589;mRNALevelsRP11-443P15.2;mRNALevelsNLRP6;mRNALevelsAPOLD1;mRNALevelsZNF101;mRNALevelsPFN1P2;mRNALevelsAGAP10;mRNALevelsRP3-395C13.1;mRNALevelsRP1-309F20.3;mRNALevelsUPF3AP1;mRNALevelsSUGT1P;mRNALevelsRPS4XP2;mRNALevelsRP5-884G6.2;mRNALeve…	0.227683	10.4
Quizartinib (AC220)	LASSO	proteinLevels;Phosphosite	proteinLevelsEBAG9;proteinLevelsCLIC2;proteinLevelsCRADD;proteinLevelsLRRC41;proteinLevelsSETD3;proteinLevelsSPRYD3;proteinLevelsINPP5D;proteinLevelsPHAX;PhosphositeHMGN1-T70tS89s;PhosphositeDNMT1-S143s;PhosphositePML-S518s;PhosphositeMRE11-S688sS689s;PhosphositeAGFG1-S181s;PhosphositePTPN11-Y62y;PhosphositeMICALL1-S471s;PhosphositeBAZ2A-S509s;PhosphositeHIST1H2BK-S92s;PhosphositeHNRNPC-T247t;Pho…	0.226061	28
Panobinostat	LogisticReg	proteinLevels	proteinLevelsGSR;proteinLevelsPPBP;proteinLevelsSLC12A2;proteinLevelsTRIP10;proteinLevelsCC2D1B;proteinLevelsNRGN;proteinLevelsSFXN2;proteinLevelsKDM5B;proteinLevelsGP1BA	0.225602	12.8
Dovitinib (CHIR-258)	LASSO	proteinLevels	proteinLevelsBACH1;proteinLevelsANKRD28;proteinLevelsCLIC2;proteinLevelsPRKRA;proteinLevelsLRRC41;proteinLevelsHGSNAT;proteinLevelsSLC25A29;proteinLevelsINPP5D;proteinLevelsTMA16;proteinLevelsFBXO4;proteinLevelsWASH6P	0.218042	22.4
17-AAG (Tanespimycin)	ElasticNet	proteinLevels;Phosphosite	proteinLevelsKMT2D;proteinLevelsMPG;proteinLevelsMLLT1;proteinLevelsMVK;proteinLevelsSF3B4;proteinLevelsNFE2;proteinLevelsOCLN;proteinLevelsHSDL1;proteinLevelsZNF787;proteinLevelsEXOC8;proteinLevelsKDM1B;proteinLevelsDDI1;proteinLevelsPDRG1;proteinLevelsHECA;proteinLevelsCDV3;proteinLevelsAGAP2;proteinLevelsZNF691;PhosphositeSF3B1-S194s;PhosphositeSVIL-S968s;PhosphositeZKSCAN1-S289s;PhosphositeAT…	0.211445	30.4
Panobinostat	LogisticReg	mRNALevels;proteinLevels;binaryMutations;Phosphosite	proteinLevelsCC2D1B;proteinLevelsKDM5B;PhosphositeRCSD1-S242sS244s;PhosphositeASAP1-S1041s;PhosphositeLSP1-T175tS177sT184t;PhosphositeSUB1-S15sS17sS19s;PhosphositePTPN12-T519t	0.209464	12.8
Trametinib (GSK1120212)	LogisticReg	mRNALevels;proteinLevels;binaryMutations;Phosphosite	proteinLevelsSKIV2L;proteinLevelsPPP1R10;proteinLevelsCOPS3;PhosphositeGMIP-S907s;PhosphositeF11R-S284sS287s;PhosphositeFAM208A-S342sT347t	0.207047	30.4
INK-128	LASSO	proteinLevels	proteinLevelsHNMT;proteinLevelsFLNC;proteinLevelsNFE2;proteinLevelsKDM1B	0.205524	24.8	histidine metabolic process,methylation,neurotransmitter catabolic process,imidazole-containing compound metabolic process,nucleosome disassembly,regulation of gene expression by genetic imprinting,chromatin disassembly,protein-DNA complex disassembly,DNA methylation involved in gamete generation,cellular biogenic amine catabolic process,amine catabolic process,ammonium ion metabolic process,resp…
Elesclomol	ElasticNet	proteinLevels;Phosphosite	proteinLevelsECE1;proteinLevelsNAMPT;proteinLevelsMCTP2;proteinLevelsBAZ2B;PhosphositeCHD1-S1622s;PhosphositeWDR46-S564s;PhosphositeGAPDH-S210s;PhosphositeC5orf24-S180s;PhosphositeZDHHC5-S432s;PhosphositeUBE2J1-S266s;PhosphositeFCHO2-T684t	0.203333	16.8
Selumetinib (AZD6244)	LogisticReg	proteinLevels	proteinLevelsBCL2;proteinLevelsLMAN1;proteinLevelsCD163;proteinLevelsRTF1	0.203091	23.4	regulation of establishment of protein localization to mitochondrion,establishment of protein localization to mitochondrion,protein localization to mitochondrion,regulation of mitochondrion organization,regulation of intracellular protein transport,mitochondrial transport,cell fate commitment,vesicle organization,glycoprotein biosynthetic process,regulation of intracellular transport,regulation o…
Elesclomol	ElasticNet	proteinLevels	proteinLevelsQSOX1;proteinLevelsVAV1;proteinLevelsECE1;proteinLevelsNAMPT;proteinLevelsCEBPG;proteinLevelsSLC25A11;proteinLevelsUBE3A;proteinLevelsMAPRE1;proteinLevelsMCTP2;proteinLevelsFERMT3;proteinLevelsPARVB;proteinLevelsARHGAP35;proteinLevelsBAZ2B;proteinLevelsMGAM;proteinLevelsFANCG	0.2	11
PP242	LASSO	proteinLevels	proteinLevelsMTHFR;proteinLevelsCARMIL2;proteinLevelsTMEM59	0.196807	29.6	tetrahydrofolate interconversion,methionine biosynthetic process,actin filament network formation,positive regulation of actin filament depolymerization,homocysteine metabolic process,regulation of protein glycosylation,positive regulation of ruffle assembly,methionine metabolic process,S-adenosylmethionine metabolic process,sulfur amino acid biosynthetic process,regulation of extracellular matri…
Gilteritinib (ASP-2215)	ElasticNet	proteinLevels	proteinLevelsATOX1;proteinLevelsDEGS1;proteinLevelsCLIC2;proteinLevelsLYRM1;proteinLevelsGAS2;proteinLevelsTRIM16;proteinLevelsCD2;proteinLevelsPSMC3;proteinLevelsTPSB2;proteinLevelsPSMC2;proteinLevelsARL3;proteinLevelsDUSP3;proteinLevelsPSMC6;proteinLevelsELP6;proteinLevelsSEPT2;proteinLevelsEIPR1;proteinLevelsPOC1A;proteinLevelsZCCHC10;proteinLevelsC4orf3;proteinLevelsFAM122A;proteinLevelsFMC1;…	0.194286	9.2	positive regulation of RNA polymerase II transcription preinitiation complex assembly,regulation of RNA polymerase II transcription preinitiation complex assembly,RNA polymerase II preinitiation complex assembly,positive regulation of transcription initiation from RNA polymerase II promoter,regulation of transcription initiation from RNA polymerase II promoter,transcription preinitiation complex …
Sorafenib	ElasticNet	proteinLevels	proteinLevelsUSP27X;proteinLevelsSOCS2;proteinLevelsEIF1AY;proteinLevelsTNPO2;proteinLevelsCLIC2;proteinLevelsSURF4;proteinLevelsLYRM1;proteinLevelsTHAP12;proteinLevelsDNPH1;proteinLevelsASNA1;proteinLevelsC21orf2;proteinLevelsNBN;proteinLevelsPRKRA;proteinLevelsURI1;proteinLevelsGOSR1;proteinLevelsTRIM16;proteinLevelsHIST1H2AB;proteinLevelsMELTF;proteinLevelsPOLR2M;proteinLevelsIRF1;proteinLevel…	0.188485	29.6	positive regulation of peptidase activity,positive regulation of proteolysis,extrinsic apoptotic signaling pathway via death domain receptors,positive regulation of mitochondrial membrane potential,positive regulation of cysteine-type endopeptidase activity involved in apoptotic process,positive regulation of endopeptidase activity,positive regulation of apoptotic signaling pathway,calcium ion ex…
INK-128	ElasticNet	proteinLevels	proteinLevelsFLNB;proteinLevelsCDK14;proteinLevelsSLC2A5;proteinLevelsMPG;proteinLevelsPNPLA4;proteinLevelsCD151;proteinLevelsHNMT;proteinLevelsFABP5;proteinLevelsFLNC;proteinLevelsNFE2;proteinLevelsNADK2;proteinLevelsARID4B;proteinLevelsZNF318;proteinLevelsKDM1B;proteinLevelsZCCHC10;proteinLevelsGRAMD1A;proteinLevelsSAR1A;proteinLevelsFAM114A2;proteinLevelsFIS1;proteinLevelsECT2;proteinLevelsTUL…	0.187343	30.4
Sorafenib	LASSO	proteinLevels	proteinLevelsCLIC2;proteinLevelsSURF4;proteinLevelsUSO1;proteinLevelsPRKRA;proteinLevelsGOSR1;proteinLevelsTRIM16;proteinLevelsFABP4;proteinLevelsATP2B4;proteinLevelsARL3;proteinLevelsNUDT2;proteinLevelsVCP;proteinLevelsADK;proteinLevelsCRADD;proteinLevelsGAMT;proteinLevelsCOX19;proteinLevelsCIR1;proteinLevelsSLC25A29;proteinLevelsSCFD1;proteinLevelsINPP5D;proteinLevelsPPP1R14B;proteinLevelsRCHY1…	0.185455	29.6	Golgi vesicle transport,purine ribonucleoside monophosphate metabolic process,purine nucleoside monophosphate metabolic process,ribonucleoside monophosphate metabolic process,postreplication repair,purine nucleoside triphosphate biosynthetic process,nucleoside monophosphate metabolic process,vesicle targeting, to, from or within Golgi,purine-containing compound salvage,AMP metabolic process,endop…
BEZ235	ElasticNet	mRNALevels;proteinLevels;binaryMutations;Phosphosite	proteinLevelsTMEM59;PhosphositeNCOR1-S509s;PhosphositeMAP7D1-S113sS116s;PhosphositeAFF4-S836s	0.185455	24
PP242	ElasticNet	proteinLevels	proteinLevelsCTDSP2;proteinLevelsCLIC2;proteinLevelsZBTB24;proteinLevelsLAT;proteinLevelsSELL;proteinLevelsNQO2;proteinLevelsTNFRSF1A;proteinLevelsMPG;proteinLevelsMTHFR;proteinLevelsSUOX;proteinLevelsRBM3;proteinLevelsMVK;proteinLevelsFLNC;proteinLevelsCARMIL2;proteinLevelsTTC37;proteinLevelsZNF276;proteinLevelsATP2A3;proteinLevelsPDLIM5;proteinLevelsTMEM147;proteinLevelsTMEM59;proteinLevelsDENN…	0.182331	29.6
17-AAG (Tanespimycin)	ElasticNet	binaryMutations	binaryMutationsBAG3;binaryMutationsNRAS;binaryMutationsKRT14;binaryMutationsPC;binaryMutationsCTCF;binaryMutationsJAK3;binaryMutationsGNB1;binaryMutationsPTPN11;binaryMutationsCOX18;binaryMutationsCUL5;binaryMutationsKIF20B;binaryMutationsTBC1D10A;binaryMutationsINCENP;binaryMutationsZMYND8;binaryMutationsTLN2;binaryMutationsCEACAM6;binaryMutationsPLEKHG2;binaryMutationsGATA3;binaryMutationsMICAL…	0.178568	25.6	camera-type eye development,regulation of establishment of cell polarity,eye development,visual system development,sensory system development,regulation of establishment or maintenance of cell polarity,regulation of neuroblast proliferation,inner ear development,ear development,regulation of cell adhesion mediated by integrin,epithelial tube formation,glial cell-derived neurotrophic factor recept…
BEZ235	LASSO	Phosphosite	PhosphositeNCOR1-S509s;PhosphositeMAP7D1-S113sS116s;PhosphositeRASAL3-S988s;PhosphositeAFF4-S836s;PhosphositeBAZ1B-S347s	0.177639	13.4
Dovitinib (CHIR-258)	LASSO	mRNALevels;proteinLevels;binaryMutations;Phosphosite	proteinLevelsBACH1;proteinLevelsPRKRA;proteinLevelsINPP5D;proteinLevelsTMA16;PhosphositeTOR1AIP1-S135sS143s;PhosphositeINPP5D-S1085s;PhosphositeASAP1-S1041s	0.177203	22.4
BEZ235	LASSO	proteinLevels;Phosphosite	proteinLevelsTMEM59;PhosphositeNCOR1-S509s;PhosphositeMAP7D1-S113sS116s;PhosphositeAFF4-S836s;PhosphositeBAZ1B-S347s	0.174003	18.8
Dovitinib (CHIR-258)	LASSO	mRNALevels	mRNALevelsPTBP3;mRNALevelsELF1;mRNALevelsFLT3;mRNALevelsPRKAG1;mRNALevelsTESC;mRNALevelsGCC1;mRNALevelsTAOK3;mRNALevelsCCDC136;mRNALevelsSFTPD;mRNALevelsBMI1;mRNALevelsTIGD3;mRNALevelsHOXB2;mRNALevelsCCDC149;mRNALevelsRP11-266K4.9;mRNALevelsRP11-561O23.8;mRNALevelsLINC00899;mRNALevelsMTND4P14;mRNALevelsRP11-338C15.3;mRNALevelsRN7SL127P;mRNALevelsRP11-58E21.3;mRNALevelsRNASEH1P1	0.170974	10.8
Cabozantinib	LogisticReg	proteinLevels	proteinLevelsCLIC2;proteinLevelsLYRM1;proteinLevelsFLT3;proteinLevelsXIAP;proteinLevelsLRRC41;proteinLevelsBAK1;proteinLevelsRHEX;proteinLevelsPOC5;proteinLevelsWDR61;proteinLevelsCDC42SE1;proteinLevelsANK3;proteinLevelsLRRC45;proteinLevelsALOX12;proteinLevelsAIF1L;proteinLevelsZNF227;proteinLevelsWASH6P;proteinLevelsSMIM31;proteinLevelsFAIM2	0.170766	22.4	positive regulation of membrane depolarization
Dovitinib (CHIR-258)	LogisticReg	proteinLevels;Phosphosite	proteinLevelsINPP5D;proteinLevelsDENND3;PhosphositeMAP1A-S1326s;PhosphositePCM1-S1186sS1187sS1188s;PhosphositeSEH1L-S179s	0.167439	22.4
JNJ-28312141	ElasticNet	binaryMutations	binaryMutationsNKRF;binaryMutationsUSO1;binaryMutationsEED;binaryMutationsDYSF;binaryMutationsTRIO;binaryMutationsSLU7;binaryMutationsBAG3;binaryMutationsNRAS;binaryMutationsKRAS;binaryMutationsSLC4A2;binaryMutationsCBL;binaryMutationsGATA2;binaryMutationsFLT3;binaryMutationsMTOR;binaryMutationsSTT3A;binaryMutationsCEBPA;binaryMutationsCPT1A;binaryMutationsLRBA;binaryMutationsJAK3;binaryMutations…	0.167332	21.6
PP242	ElasticNet	binaryMutations	binaryMutationsUSO1;binaryMutationsDYSF;binaryMutationsCPT1A;binaryMutationsGTF2I;binaryMutationsTLR1;binaryMutationsMYBBP1A;binaryMutationsIRS2;binaryMutationsFBRS;binaryMutationsIGF1;binaryMutationsMYH15;binaryMutationsLRRC37A3;binaryMutationsFAM186A;binaryMutationsNKX3-2;binaryMutationsNDST4	0.16437	20.2	protein secretion,establishment of protein localization to extracellular region,protein localization to extracellular region,cellular polysaccharide biosynthetic process,polysaccharide biosynthetic process,positive regulation of fatty acid beta-oxidation,cellular carbohydrate biosynthetic process,cellular carbohydrate metabolic process,cellular polysaccharide metabolic process,positive regulation…
PI-103	ElasticNet	Phosphosite	PhosphositeSLC9A3R1-T293t;PhosphositeMTSS1-S272s;PhosphositeEPB41-S378s;PhosphositeTCEA1-S114s;PhosphositeSP100-S193s;PhosphositeLSP1-S177sS189sS193s;PhosphositeTMPO-S66sS67sT74t;PhosphositePI4KA-S256s;PhosphositeTLE3-S286s;PhosphositeTLE3-T259tS263sS267s;PhosphositePRKCQ-S676s;PhosphositeSRSF6-S45s;PhosphositeMAP7D1-S113sS116s;PhosphositeZC3H13-S848sY851yS853s;PhosphositeKIAA0930-S362s;Phosphosi…	0.163636	29.6
Quizartinib (AC220)	ElasticNet	Phosphosite	PhosphositeTP53I11-S14s;PhosphositeZNF609-S358s;PhosphositeZNF609-S467s;PhosphositeSTX7-T79t;PhosphositeMEFV-S187s;PhosphositeMYCBP2-S2833s;PhosphositeMTA2-S54s;PhosphositeHMGN1-T70tS89s;PhosphositeETFA-S192s;PhosphositeTFEB-S109sS114sS122s;PhosphositeDNMT1-S143s;PhosphositeDNMT1-S22s;PhosphositePML-S518s;PhosphositeMRE11-S688sS689s;PhosphositeAGFG1-T177tS181s;PhosphositeAGFG1-S181s;PhosphositeLI…	0.16329	28
Ponatinib (AP24534)	ElasticNet	mRNALevels;proteinLevels;binaryMutations;Phosphosite	proteinLevelsXPO1;proteinLevelsRIPK2;proteinLevelsPRKRA;proteinLevelsTRIM16;proteinLevelsTHOP1;proteinLevelsHCCS;proteinLevelsPSMD5;proteinLevelsINPP5D;proteinLevelsMRPS18A;proteinLevelsBSDC1;proteinLevelsRPS6KB2;proteinLevelsTEPSIN;proteinLevelsSCAP;proteinLevelsRABL2A;PhosphositeC2CD2L-S613sS619s;PhosphositeAP3D1-S658s;PhosphositeARHGAP6-S330sT337t;PhosphositeHNRNPR-S23s;PhosphositeDDX5-S520s;P…	0.161732	27.2
BEZ235	LASSO	mRNALevels;proteinLevels;binaryMutations;Phosphosite	proteinLevelsTMEM59;PhosphositeNCOR1-S509s;PhosphositeMAP7D1-S113sS116s;PhosphositeAFF4-S836s;PhosphositeBAZ1B-S347s	0.161299	24
INK-128	ElasticNet	mRNALevels;proteinLevels;binaryMutations;Phosphosite	mRNALevelsLNP1;mRNALevelsZ83844.1;mRNALevelsRP11-493K19.3;mRNALevelsCTD-2547L16.1;mRNALevelsRP11-849H4.4;mRNALevelsRP1-68D18.4;mRNALevelsRP11-114N19.3;mRNALevelsCTD-2369P2.5;mRNALevelsAC008964.1;mRNALevelsRP3-337O18.9;proteinLevelsFLNB;proteinLevelsHNMT;proteinLevelsFLNC;proteinLevelsNFE2;PhosphositeHNRNPA2B1-S318s;PhosphositeSRSF6-S45s;PhosphositeEIF4EBP2-T36tT46t;PhosphositeMAP7D1-S113sS116s;Ph…	0.16	24.8
Quizartinib (AC220)	ElasticNet	proteinLevels;Phosphosite	proteinLevelsEBAG9;proteinLevelsCLIC2;proteinLevelsCRADD;proteinLevelsLRRC41;proteinLevelsETFRF1;proteinLevelsSETD3;proteinLevelsSPRYD3;proteinLevelsRFWD2;proteinLevelsINPP5D;proteinLevelsPHAX;PhosphositeETFA-S192s;PhosphositeDNMT1-S143s;PhosphositeDNMT1-S22s;PhosphositePML-S518s;PhosphositeMRE11-S688sS689s;PhosphositeAGFG1-T177tS181s;PhosphositeAGFG1-S181s;PhosphositeMICALL1-S471s;PhosphositePDL…	0.15974	28
Ponatinib (AP24534)	LASSO	mRNALevels;proteinLevels;binaryMutations;Phosphosite	PhosphositePML-S408sT409t;PhosphositePML-S504sS505s;PhosphositePLEC-S4622s;PhosphositeCAAP1-T90tS92s;PhosphositeZNHIT6-S25s	0.152208	27.2
PP242	ElasticNet	proteinLevels;Phosphosite	proteinLevelsCTDSP2;proteinLevelsCLIC2;proteinLevelsMPG;proteinLevelsMTHFR;proteinLevelsRBM3;proteinLevelsMVK;proteinLevelsCARMIL2;proteinLevelsZNF276;proteinLevelsPDLIM5;proteinLevelsFAM118A;PhosphositeLMNA-S458s;PhosphositeLMNA-S429s;PhosphositeAKT1-T308t;PhosphositeAKT2-T309t;PhosphositeRUNX1-T14tT18t;PhosphositeMAP7D1-S113sS116s;PhosphositeTOR1AIP1-T147t;PhosphositeEEPD1-S16sS19s;PhosphositeR…	0.151352	29.6
Sorafenib	LASSO	mRNALevels;proteinLevels;binaryMutations;Phosphosite	mRNALevelsITGA11;mRNALevelsMXRA8;mRNALevelsTRIM15;mRNALevelsGS1-115G20.1;mRNALevelsRP3-395M20.8;proteinLevelsCLIC2;proteinLevelsPRKRA;proteinLevelsURI1;proteinLevelsARL3;proteinLevelsCRADD;proteinLevelsINPP5D;proteinLevelsRCHY1;proteinLevelsFUT8;proteinLevelsPHAX;proteinLevelsGMPR2;proteinLevelsAGO2;binaryMutationsFLT3;PhosphositeMBP-S26s;PhosphositeMRE11-S688sS689s;PhosphositePTPN11-Y62y;Phospho…	0.146061	29.6
PI-103	LogisticReg	Phosphosite	PhosphositeCHD3-T1541tS1545sS1549s;PhosphositeIVNS1ABP-T272t;PhosphositeZNF831-S439s;PhosphositeTLE3-T321t;PhosphositeCTR9-S1037sS1039sS1041s;PhosphositeEMSY-S168s;PhosphositeIWS1-S261sS263s	0.144488	29.6
Selumetinib (AZD6244)	ElasticNet	proteinLevels;Phosphosite	proteinLevelsSTX16;proteinLevelsU2SURP;proteinLevelsSIVA1;proteinLevelsTGFB1I1;proteinLevelsSORBS3;proteinLevelsSYNCRIP;proteinLevelsABCB7;proteinLevelsFLNB;proteinLevelsUBXN7;proteinLevelsGSR;proteinLevelsHRAS;proteinLevelsFYN;proteinLevelsLYN;proteinLevelsLGALS1;proteinLevelsRRAS;proteinLevelsBCL2;proteinLevelsSRC;proteinLevelsEZR;proteinLevelsTCF4;proteinLevelsSPN;proteinLevelsNAGA;proteinLeve…	0.14436	28.8
Entrectinib	ElasticNet	proteinLevels;Phosphosite	proteinLevelsMGST3;proteinLevelsPRMT3;proteinLevelsSEC22B;proteinLevelsKDM4B;proteinLevelsMBD4;proteinLevelsGOSR1;proteinLevelsC4A;proteinLevelsC4B;proteinLevelsCD99;proteinLevelsCBR1;proteinLevelsCSNK2A2;proteinLevelsVARS;proteinLevelsGK;proteinLevelsEIF1AX;proteinLevelsCLK3;proteinLevelsPSMA6;proteinLevelsSCRN3;proteinLevelsTSPAN31;proteinLevelsGK2;proteinLevelsPSMD5;proteinLevelsCENPW;proteinL…	0.14	11
Trametinib (GSK1120212)	LogisticReg	proteinLevels	proteinLevelsSURF4;proteinLevelsBCL2;proteinLevelsORM2;proteinLevelsMUT;proteinLevelsSCP2;proteinLevelsSERPINB6;proteinLevelsCNBP;proteinLevelsSKIV2L;proteinLevelsEFL1;proteinLevelsNSMCE1;proteinLevelsPPP1R10;proteinLevelsPIH1D1;proteinLevelsCOPS3	0.138768	30.4
PI-103	ElasticNet	mRNALevels	mRNALevelsHMGB3;mRNALevelsHLA-DRB1;mRNALevelsCD74;mRNALevelsMAP2K3;mRNALevelsCDK9;mRNALevelsBRPF1;mRNALevelsZNF174;mRNALevelsJADE1;mRNALevelsHACE1;mRNALevelsTADA1;mRNALevelsSUCLG2;mRNALevelsHSH2D;mRNALevelsMTFP1;mRNALevelsTTC7A;mRNALevelsCOPS3;mRNALevelsTIMM10B;mRNALevelsZBTB32;mRNALevelsMSANTD3;mRNALevelsHOMER2;mRNALevelsABCA2;mRNALevelsTFAP2E;mRNALevelsIGJ;mRNALevelsPSRC1;mRNALevelsARHGAP32;mRN…	0.138068	20	histone H3 acetylation,positive regulation of viral entry into host cell,positive regulation by symbiont of entry into host,positive regulation of monocyte differentiation,histone acetylation,internal peptidyl-lysine acetylation,internal protein amino acid acetylation,negative regulation of B cell apoptotic process,peptidyl-lysine acetylation,histone H3-K14 acetylation,protein acetylation
Trametinib (GSK1120212)	LASSO	binaryMutations	binaryMutationsKMT2D;binaryMutationsUSO1;binaryMutationsEED;binaryMutationsSF3B1;binaryMutationsDYSF;binaryMutationsTRIO;binaryMutationsKRAS;binaryMutationsTP53;binaryMutationsGATA2;binaryMutationsCCND3;binaryMutationsFLT3;binaryMutationsCPT1A;binaryMutationsSTAT5B;binaryMutationsJAK3;binaryMutationsGNB1;binaryMutationsGTF2I;binaryMutationsRUNX1;binaryMutationsPTPN11;binaryMutationsTLR1;binaryMut…	0.133118	15.2	cellular response to peptide,positive regulation of cell-cell adhesion,lymphocyte proliferation,mononuclear cell proliferation,positive regulation of cell adhesion,myeloid cell differentiation,regulation of cell-cell adhesion,leukocyte proliferation,T cell activation,homeostasis of number of cells,negative regulation of hemopoiesis,positive regulation of leukocyte activation,positive regulation o…
Gilteritinib (ASP-2215)	LASSO	binaryMutations	binaryMutationsRAD21;binaryMutationsAQR;binaryMutationsNRAS;binaryMutationsLRBA;binaryMutationsMAP1A;binaryMutationsNFX1;binaryMutationsATM;binaryMutationsRASA2;binaryMutationsCENPK;binaryMutationsSCAF1;binaryMutationsKAT8;binaryMutationsZBTB21;binaryMutationsSMC3;binaryMutationsTRRAP;binaryMutationsSEC23IP;binaryMutationsVIMP;binaryMutationsKIF21A;binaryMutationsTNFRSF11A;binaryMutationsAP3S2;bi…	0.131162	6.6	nuclear chromosome segregation,reciprocal meiotic recombination,homologous recombination,chromosome segregation,sister chromatid segregation
Cabozantinib	LogisticReg	mRNALevels	mRNALevelsMMP2;mRNALevelsITGA11;mRNALevelsFAM92A1P1;mRNALevelsZDHHC11B	0.130383	14.4	extracellular matrix organization,extracellular structure organization,ossification,bone trabecula formation,bone trabecula morphogenesis,collagen-activated signaling pathway,peptidyl-L-cysteine S-palmitoylation,peptidyl-S-diacylglycerol-L-cysteine biosynthetic process from peptidyl-cysteine,trabecula formation,substrate-dependent cell migration,face morphogenesis,protein palmitoylation,head morp…
BEZ235	ElasticNet	proteinLevels;Phosphosite	proteinLevelsZBTB24;proteinLevelsAPOC2;proteinLevelsMVK;proteinLevelsIWS1;proteinLevelsTMEM70;proteinLevelsTMEM59;proteinLevelsMAPK8IP3;PhosphositeNCOR1-S509s;PhosphositeTCOF1-T173tS178s;PhosphositeEIF4EBP2-T36tT46t;PhosphositeRBM39-S136s;PhosphositeMAP7D1-S113sS116s;PhosphositeTOR1AIP1-T147t;PhosphositeRASAL3-S988s;PhosphositePANK2-S189s;PhosphositeXRN2-S445s;PhosphositeDNMT3B-S835s;PhosphositeT…	0.127273	24
Sorafenib	ElasticNet	mRNALevels;proteinLevels;binaryMutations;Phosphosite	mRNALevelsDAPL1;mRNALevelsPLEKHB1;mRNALevelsCOL5A1;mRNALevelsITGA11;mRNALevelsCCDC175;mRNALevelsCYSLTR2;mRNALevelsFAM92A1P1;mRNALevelsFBLIM1;mRNALevelsMXRA8;mRNALevelsRNF180;mRNALevelsHIST1H3I;mRNALevelsFAM47E;mRNALevelsHIST1H2BH;mRNALevelsTRIM15;mRNALevelsAF064858.6;mRNALevelsRP4-784A16.5;mRNALevelsGS1-115G20.1;mRNALevelsCHRM3-AS2;mRNALevelsMIR155HG;mRNALevelsRP11-338C15.3;mRNALevelsRP3-395M20.8…	0.125455	29.6
Trametinib (GSK1120212)	ElasticNet	Phosphosite	PhosphositePDCD5-S51s;PhosphositeSIPA1L1-S208s;PhosphositeMAP4K4-S933s;PhosphositeARFIP1-S132s;PhosphositeZFP36L1-S54s;PhosphositeSYNRG-S1085s;PhosphositeNCOR2-S2065sS2069s	0.1252	30.4
PI-103	ElasticNet	proteinLevels;Phosphosite	proteinLevelsLIPT2;proteinLevelsE2F3;proteinLevelsKMT2D;proteinLevelsU2SURP;proteinLevelsHNRNPR;proteinLevelsAP1G1;proteinLevelsFLNB;proteinLevelsZBTB7A;proteinLevelsPOLR1A;proteinLevelsRRAS;proteinLevelsMPG;proteinLevelsALDH1B1;proteinLevelsADARB1;proteinLevelsHMGN5;proteinLevelsTLE3;proteinLevelsMTA1;proteinLevelsFLNC;proteinLevelsTNIP1;proteinLevelsTWISTNB;proteinLevelsHSDL1;proteinLevelsZNF78…	0.120909	29.6
JNJ-28312141	LASSO	binaryMutations	binaryMutationsNKRF;binaryMutationsUSO1;binaryMutationsEED;binaryMutationsDYSF;binaryMutationsSLU7;binaryMutationsBAG3;binaryMutationsNRAS;binaryMutationsKRAS;binaryMutationsNPM1;binaryMutationsCBL;binaryMutationsMTOR;binaryMutationsCEBPA;binaryMutationsCPT1A;binaryMutationsGNB1;binaryMutationsGTF2I;binaryMutationsSRSF2;binaryMutationsPTPN11;binaryMutationsCTTN;binaryMutationsSMC1A;binaryMutation…	0.12015	14	protein export from nucleus,nuclear export,regulation of fatty acid beta-oxidation,regulation of fatty acid oxidation,interleukin-6-mediated signaling pathway,response to radiation,cellular response to abiotic stimulus,cellular response to environmental stimulus,Ras protein signal transduction,nucleocytoplasmic transport,nuclear transport,positive regulation of fatty acid beta-oxidation,neuron de…
Selinexor	ElasticNet	proteinLevels	proteinLevelsIGKV3D-11;proteinLevelsSAP30;proteinLevelsIGHM;proteinLevelsGLUL;proteinLevelsMPI;proteinLevelsSARS;proteinLevelsSERPINH1;proteinLevelsPMVK;proteinLevelsCPTP;proteinLevelsZCCHC8;proteinLevelsRABEPK;proteinLevelsDENND1C;proteinLevelsC4orf3;proteinLevelsTBC1D5;proteinLevelsOSGEP;proteinLevelsGEMIN8;proteinLevelsFBXL12;proteinLevelsBCAP29;proteinLevelsCORO1C;proteinLevelsSTK24;proteinLe…	0.12	8.8
Dovitinib (CHIR-258)	ElasticNet	mRNALevels	mRNALevelsPTBP3;mRNALevelsELF1;mRNALevelsPRKAG1;mRNALevelsIFT88;mRNALevelsTESC;mRNALevelsGCC1;mRNALevelsTAOK3;mRNALevelsPROCR;mRNALevelsCCDC136;mRNALevelsSFTPD;mRNALevelsBMI1;mRNALevelsTIGD3;mRNALevelsHOXB2;mRNALevelsCCDC149;mRNALevelsTRGJP2;mRNALevelsRP11-266K4.9;mRNALevelsRP11-39K24.4;mRNALevelsRP11-561O23.8;mRNALevelsMTND5P14;mRNALevelsLINC00899;mRNALevelsMTND4P14;mRNALevelsRP11-396M11.1;mRNAL…	0.119179	14.4
Sorafenib	LASSO	proteinLevels;Phosphosite	proteinLevelsCLIC2;proteinLevelsLYRM1;proteinLevelsPRKRA;proteinLevelsURI1;proteinLevelsTRIM16;proteinLevelsKRT13;proteinLevelsFABP4;proteinLevelsARL3;proteinLevelsTHOP1;proteinLevelsCRADD;proteinLevelsSLC25A29;proteinLevelsSTON2;proteinLevelsINPP5D;proteinLevelsRCHY1;proteinLevelsPTGES2;proteinLevelsPHAX;proteinLevelsGMPR2;proteinLevelsAGO2;PhosphositeMBP-S26s;PhosphositeEIF4B-S497sS498s;Phospho…	0.114848	29.6
Trametinib (GSK1120212)	LASSO	Phosphosite	PhosphositePDCD5-S51s;PhosphositeSIPA1L1-S208s;PhosphositeMAP4K4-S933s;PhosphositeARFIP1-S132s;PhosphositeZFP36L1-S54s;PhosphositeSYNRG-S1085s;PhosphositeNCOR2-S2065sS2069s	0.111099	30.4
Foretinib (XL880)	ElasticNet	proteinLevels;Phosphosite	proteinLevelsKMT2D;proteinLevelsCLIC2;proteinLevelsMBD4;proteinLevelsCRADD;proteinLevelsINPP5D;proteinLevelsPOMT2;PhosphositeMTSS1-S272s;PhosphositeTCEA1-S114s;PhosphositeDNMT1-S143s;PhosphositeDNMT1-S22s;PhosphositeMRE11-S688sS689s;PhosphositeLRBA-S1133sS1135s;PhosphositeRBM10-S60sS61sS65s;PhosphositeKMT2A-S183s;PhosphositeTRIM28-S752s;PhosphositeNCAPD2-S1333s;PhosphositeMICALL1-S471s;Phosphosit…	0.108881	29.6
Quizartinib (AC220)	LASSO	mRNALevels	mRNALevelsBNIP3L;mRNALevelsHSP90B2P;mRNALevelsSYVN1;mRNALevelsSEPT7P9;mRNALevelsMGAT4B;mRNALevelsMLF1;mRNALevelsSYS1;mRNALevelsAF064858.6;mRNALevelsLINC00908	0.107464	17.6
Foretinib (XL880)	LogisticReg	proteinLevels;Phosphosite	proteinLevelsCLIC2;proteinLevelsTHOP1;proteinLevelsPSMD5;proteinLevelsINPP5D;proteinLevelsPPP1R14B;PhosphositeDNMT1-S143s;PhosphositeLRBA-S1133sS1135s;PhosphositeIL1RAP-S556sS557s;PhosphositeAFDN-S1779s;PhosphositeZYX-T306t;PhosphositePBRM1-S13sS16s;PhosphositeCEP192-S1349s;PhosphositeSRRM2-T348tS351sS353s;PhosphositeDNMT3A-S243sT257tT261t;PhosphositePATL1-T194t;PhosphositeSPEN-S2359s;Phosphosite…	0.106199	29.6
Elesclomol	LogisticReg	mRNALevels	mRNALevelsNEDD4L;mRNALevelsPLXNA2;mRNALevelsLRP11;mRNALevelsPHLDA3;mRNALevelsVDAC3P1	0.105915	14.2	positive regulation of neuron projection development,regulation of cell morphogenesis involved in differentiation,limb bud formation,positive regulation of neuron differentiation,positive regulation of cell projection organization,caveolin-mediated endocytosis,semaphorin-plexin signaling pathway involved in axon guidance,negative regulation of sodium ion transmembrane transporter activity,semapho…
INK-128	ElasticNet	proteinLevels;Phosphosite	proteinLevelsFLNB;proteinLevelsHNMT;proteinLevelsFLNC;proteinLevelsNFE2;proteinLevelsKDM1B;PhosphositeHNRNPA2B1-S318s;PhosphositePTPN6-S10s;PhosphositeSRSF6-S45s;PhosphositeEIF4EBP2-T36tT46t;PhosphositeMAP7D1-S113sS116s;PhosphositeINPP5D-S960sT963t;PhosphositeBCL3-S41s;PhosphositeRAB25-S79s;PhosphositeTRPS1-S178s;PhosphositeZNF787-S46s;PhosphositePLEC-S2039s	0.104336	24.8
PP242	LASSO	proteinLevels;Phosphosite	proteinLevelsCARMIL2;PhosphositeLMNA-S429s;PhosphositeRUNX1-T14tT18t;PhosphositeEEPD1-S16sS19s;PhosphositeRALGPS2-T361t;PhosphositeNF1-S2543s	0.103566	29.6
Quizartinib (AC220)	ElasticNet	mRNALevels	mRNALevelsBNIP3L;mRNALevelsCASP4;mRNALevelsIGFBP7;mRNALevelsHSP90B2P;mRNALevelsSYVN1;mRNALevelsCKAP2;mRNALevelsANKRD12;mRNALevelsSEPT7P9;mRNALevelsMMEL1;mRNALevelsMGAT4B;mRNALevelsEMR1;mRNALevelsMLF1;mRNALevelsSKIDA1;mRNALevelsSYS1;mRNALevelsAF064858.6;mRNALevelsRP11-387D10.3;mRNALevelsCTB-114C7.4;mRNALevelsLINC00908;mRNALevelsVN1R83P	0.100223	17.6
Entrectinib	ElasticNet	Phosphosite	PhosphositeFCHO1-T574tS576s;PhosphositeRNF113A-S45sS46sS47s;PhosphositeMCM3-T713t;PhosphositeFXR1-S409sT411t;PhosphositeDOCK8-S451sS459s;PhosphositeTRIM11-S85s;PhosphositeSCAF1-S1198s;PhosphositeCARS2-S545s;PhosphositeCIZ1-T244t;PhosphositeMORC2-S739sS743s;PhosphositeNCOA2-S266sT272t;PhosphositeODF2-S814sS826s;PhosphositeINTS3-S1015sS1016sT1023t;PhosphositeCRTC3-S391s;PhosphositeIRF2BPL-S662s;Pho…	0.1	11
Cabozantinib	LASSO	binaryMutations	binaryMutationsCHD2;binaryMutationsNKRF;binaryMutationsZNF292;binaryMutationsAQR;binaryMutationsTRIO;binaryMutationsSLU7;binaryMutationsNRAS;binaryMutationsKRAS;binaryMutationsTP53;binaryMutationsSLC4A2;binaryMutationsNPM1;binaryMutationsF5;binaryMutationsGATA2;binaryMutationsMYH11;binaryMutationsFLT3;binaryMutationsMTOR;binaryMutationsLRBA;binaryMutationsMAP1A;binaryMutationsATM;binaryMutationsC…	0.0959833	9.4	response to radiation,TORC1 signaling,hematopoietic progenitor cell differentiation,cellular response to radiation,cell aging,nuclear export,cellular response to ionizing radiation,response to light stimulus,protein autophosphorylation,negative regulation of macroautophagy
BEZ235	ElasticNet	Phosphosite	PhosphositePDCD5-S51s;PhosphositeNCOR1-S509s;PhosphositeTCOF1-T173tS178s;PhosphositeEIF4EBP2-T36tT46t;PhosphositeRBM39-S136s;PhosphositeTRIP12-S119sS127s;PhosphositeRALGAPA2-S480s;PhosphositeMAP7D1-S113sS116s;PhosphositeTOR1AIP1-T147t;PhosphositeRICTOR-S1396s;PhosphositeARHGEF18-S1103s;PhosphositeRASAL3-S988s;PhosphositeMSL3-S400s;PhosphositeNACC1-S125s;PhosphositePASK-S116s;PhosphositePANK2-S189…	0.0884848	29.6
Flavopiridol	ElasticNet	proteinLevels;Phosphosite	proteinLevelsTARSL2;proteinLevelsPDHX;proteinLevelsSORBS3;proteinLevelsFLNB;proteinLevelsNCOR1;proteinLevelsEZR;proteinLevelsTFEB;proteinLevelsSERPINB10;proteinLevelsRUNX1;proteinLevelsDIP2A;proteinLevelsMBLAC2;proteinLevelsCC2D1A;proteinLevelsAPTX;proteinLevelsMGA;proteinLevelsTSPAN14;proteinLevelsRAD50;proteinLevelsMOB3A;proteinLevelsFAM136A;proteinLevelsSFXN2;proteinLevelsFAM129B;proteinLevels…	0.0868998	29.6
JQ1	ElasticNet	binaryMutations	binaryMutationsC5orf51;binaryMutationsRAD21;binaryMutationsURB1;binaryMutationsAQR;binaryMutationsTRIO;binaryMutationsNRAS;binaryMutationsKRT14;binaryMutationsSLC4A2;binaryMutationsPC;binaryMutationsITGB5;binaryMutationsCCND3;binaryMutationsRFC1;binaryMutationsMYH11;binaryMutationsFLT3;binaryMutationsMAP1B;binaryMutationsIDH2;binaryMutationsCTCF;binaryMutationsLRBA;binaryMutationsJAK3;binaryMutat…	0.0783276	12.4	homophilic cell adhesion via plasma membrane adhesion molecules,histone acetylation,histone H3-K9 acetylation,internal peptidyl-lysine acetylation,internal protein amino acid acetylation,synapse organization,regulation of rRNA processing,peptidyl-lysine acetylation,meiotic nuclear division,regulation of ribosome biogenesis,meiotic cell cycle process,male meiotic nuclear division,intermediate fila…
PP242	ElasticNet	mRNALevels;proteinLevels;binaryMutations;Phosphosite	mRNALevelsSNORD20;mRNALevelsRP11-715J22.2;mRNALevelsCTD-2542L18.1;mRNALevelsMIR5192;mRNALevelsFAM106CP;proteinLevelsMPG;proteinLevelsMTHFR;proteinLevelsRBM3;proteinLevelsMVK;proteinLevelsCARMIL2;proteinLevelsZNF276;proteinLevelsPDLIM5;proteinLevelsFAM118A;PhosphositeLMNA-S458s;PhosphositeLMNA-S429s;PhosphositeRUNX1-T14tT18t;PhosphositeMAP7D1-S113sS116s;PhosphositeTOR1AIP1-T147t;PhosphositeEEPD1-S…	0.0767366	29.6
A-674563	LASSO	binaryMutations	binaryMutationsTRANK1;binaryMutationsAQR;binaryMutationsIDH1;binaryMutationsDYSF;binaryMutationsSLU7;binaryMutationsNRAS;binaryMutationsSLC4A2;binaryMutationsNPM1;binaryMutationsGATA2;binaryMutationsCCND3;binaryMutationsFLT3;binaryMutationsMTOR;binaryMutationsCEBPA;binaryMutationsLRBA;binaryMutationsGNB1;binaryMutationsPRKCE;binaryMutationsKMT2A;binaryMutationsATM;binaryMutationsEZH2;binaryMutati…	0.075985	19.6	macrophage activation
JNJ-28312141	LASSO	proteinLevels;Phosphosite	proteinLevelsAKT1S1;PhosphositeMED24-S873s;PhosphositeARHGEF6-S124s;PhosphositeCCSAP-S240s;PhosphositeCAAP1-T90tS92s	0.0728571	21.4
Dovitinib (CHIR-258)	ElasticNet	proteinLevels;Phosphosite	proteinLevelsDDX39A;proteinLevelsBACH1;proteinLevelsANKRD28;proteinLevelsCLIC2;proteinLevelsLYRM1;proteinLevelsPRKRA;proteinLevelsTRIM16;proteinLevelsPTBP3;proteinLevelsMB;proteinLevelsCTSL;proteinLevelsPOLR2E;proteinLevelsFDXR;proteinLevelsGCSH;proteinLevelsPSMA4;proteinLevelsPNPLA4;proteinLevelsGNPDA1;proteinLevelsCRADD;proteinLevelsFKBP3;proteinLevelsNOTCH2;proteinLevelsNFIA;proteinLevelsBIRC3…	0.0689977	22.4
INK-128	LASSO	mRNALevels;proteinLevels;binaryMutations;Phosphosite	mRNALevelsRP11-114N19.3;proteinLevelsHNMT;PhosphositeSRSF6-S45s;PhosphositeMAP7D1-S113sS116s;PhosphositeINPP5D-S960sT963t	0.0671795	24.8
PP242	ElasticNet	mRNALevels	mRNALevelsZNF814;mRNALevelsSPINT1;mRNALevelsKCNAB2;mRNALevelsZNF667;mRNALevelsJADE1;mRNALevelsIPO4;mRNALevelsVPS13A;mRNALevelsTSNAX;mRNALevelsCAB39L;mRNALevelsINTS10;mRNALevelsMPP6;mRNALevelsSNX6;mRNALevelsCABIN1;mRNALevelsRHBDF1;mRNALevelsHSD17B1;mRNALevelsEVI2A;mRNALevelsSPRY2;mRNALevelsLRRC37A3;mRNALevelsGLULP4;mRNALevelsHSP90AA6P;mRNALevelsPARK2;mRNALevelsPRR5;mRNALevelsTNRC18P3;mRNALevelsCTB…	0.0647449	19.2
Ponatinib (AP24534)	LogisticReg	proteinLevels;Phosphosite	proteinLevelsPSMA6;proteinLevelsVRK3;proteinLevelsMRPL38;proteinLevelsSHARPIN;PhosphositeKMT2D-S2726s;PhosphositeWWOX-T12tS14s;PhosphositeMIEF1-S55s;PhosphositeUTRN-S1405s;PhosphositePPHLN1-S197sS201s;PhosphositeBAZ2A-S509s;PhosphositeIQSEC1-S109s;PhosphositeLRRC41-T327tS330s;PhosphositeSUGP2-S133s;PhosphositeHIST1H3A-T46t;PhosphositeH3F3A-T46t;PhosphositeDAXX-S515s;PhosphositeKIF16B-S1017s;Phosp…	0.0630838	27.2
Foretinib (XL880)	LASSO	mRNALevels;proteinLevels;binaryMutations;Phosphosite	proteinLevelsKMT2D;proteinLevelsCLIC2;proteinLevelsMBD4;proteinLevelsCRADD;proteinLevelsINPP5D;proteinLevelsPOMT2;PhosphositeTCEA1-S114s;PhosphositeDNMT1-S143s;PhosphositeDNMT1-S22s;PhosphositeLRBA-S1133sS1135s;PhosphositeSCRIB-T1549tS1566s;PhosphositeNCAPD2-S1333s;PhosphositeUBR7-S263sS265s;PhosphositeRTF1-S697s;PhosphositeANKS1A-S661s;PhosphositeAP1M1-T223t;PhosphositePCIF1-S159s;PhosphositeSPE…	0.06	19.2
Ponatinib (AP24534)	LogisticReg	mRNALevels;proteinLevels;binaryMutations;Phosphosite	mRNALevelsINPP5J;mRNALevelsAP000525.9;mRNALevelsLL22NC03-N14H11.1;proteinLevelsPRKRA;proteinLevelsPSMA6;proteinLevelsVRK3;proteinLevelsMRPL38;proteinLevelsSHARPIN;proteinLevelsMRPS18A;PhosphositeKMT2D-S2726s;PhosphositeZNHIT6-S25s;PhosphositeMIEF1-S55s;PhosphositeHLA-A-S356s;PhosphositePFN1-S57s;PhosphositeSUGP2-S133s;PhosphositeIVNS1ABP-S277s;PhosphositeHIST1H3A-T46t;PhosphositeH3F3A-T46t;Phosph…	0.0527061	27.2
Panobinostat	LASSO	proteinLevels	proteinLevelsGSR;proteinLevelsMCU;proteinLevelsSH3GL1;proteinLevelsLILRB2;proteinLevelsTM7SF3	0.0428571	10	positive regulation of insulin secretion,positive regulation of peptide hormone secretion,positive regulation of hormone secretion,positive regulation of protein secretion,regulation of insulin secretion,positive regulation of peptide secretion,insulin secretion,regulation of peptide hormone secretion,peptide hormone secretion,regulation of hormone secretion,regulation of T cell tolerance inducti…
Staurosporine	ElasticNet	mRNALevels;proteinLevels;binaryMutations;Phosphosite	mRNALevelsSPECC1;mRNALevelsSPIDR;proteinLevelsATG4A;PhosphositeSLC25A46-S37sT45t;PhosphositeSRRM2-S1497sS1499s;PhosphositePIEZO1-S1646s	0.04	5
Dovitinib (CHIR-258)	ElasticNet	Phosphosite	PhosphositeCNK3/IPCEF1-S796s;PhosphositeAGPS-S65s;PhosphositeFCHO1-S570s;PhosphositeFCHO1-S576s;PhosphositeRGL2-T740tT752t;PhosphositeMEFV-S187s;PhosphositeLAMTOR5-S26s;PhosphositeMYCBP2-S2833s;PhosphositeSTK10-T952t;PhosphositeCHEK2-S120s;PhosphositeLMNA-T409tS414s;PhosphositeMBP-S26s;PhosphositeHNRNPA1-S337s;PhosphositePOLR2M-S10s;PhosphositeSKI-S480s;PhosphositeVCAN-T2115t;PhosphositeGYS1-S710…	0.0328671	22.4
SNS-032 (BMS-387032)	LASSO	proteinLevels;Phosphosite	proteinLevelsTPSB2;proteinLevelsCBX5;proteinLevelsPDIA5;proteinLevelsCEBPE;proteinLevelsESCO2;proteinLevelsNTAN1;proteinLevelsGCC1;PhosphositeZNF217-T648t;PhosphositeAKAP17A-S638sT639tS640s;PhosphositeRRAGC-S382s;PhosphositeRAB25-S79s;PhosphositeZNF592-S459sS460s;PhosphositeRTN4-S121sS129s;PhosphositeRBMX-Y214y;PhosphositeRBMXL1-Y214y	0.0326573	30.4
Dovitinib (CHIR-258)	LogisticReg	Phosphosite	PhosphositeSTK10-S450sS454s;PhosphositeMAP1A-S1326s;PhosphositeGCSAML-S94s;PhosphositeINPP5D-T1108t;PhosphositeCORO1A-S427s;PhosphositeSEH1L-S179s;PhosphositePPP2R5E-S33s	0.0314139	22.4
17-AAG (Tanespimycin)	LASSO	mRNALevels;proteinLevels;binaryMutations;Phosphosite	mRNALevelsCCDC15;mRNALevelsRPS26P11;proteinLevelsHSDL1;PhosphositeMICALL1-S471s;PhosphositeSH2D3C-S440s;PhosphositeINPP5D-S960sT963t;PhosphositeEIF4ENIF1-S951s;PhosphositeINPP5D-S960s;PhosphositeTCF20-S559sT582tS583s;PhosphositePLEC-S2039s;PhosphositeKAT5-T195tS202sS203s	0.0307226	30.4
17-AAG (Tanespimycin)	LASSO	proteinLevels;Phosphosite	proteinLevelsHSDL1;PhosphositeINPP5D-S960sT963t;PhosphositeEIF4ENIF1-S951s;PhosphositeRNF168-S134s;PhosphositeINPP5D-S960s;PhosphositeTCF20-S559sT582tS583s;PhosphositePLEC-S2039s	0.029324	30.4
Cabozantinib	ElasticNet	mRNALevels	mRNALevelsPPIAL4C;mRNALevelsDAPL1;mRNALevelsMAP1LC3B2;mRNALevelsSOCS2;mRNALevelsTOR1A;mRNALevelsSURF4;mRNALevelsZBTB24;mRNALevelsLYRM1;mRNALevelsSUV39H1;mRNALevelsTRIM16;mRNALevelsSLU7;mRNALevelsPTBP3;mRNALevelsRPN1;mRNALevelsJUN;mRNALevelsLDHC;mRNALevelsUBL4A;mRNALevelsH2AFX;mRNALevelsATP2B4;mRNALevelsPTPN7;mRNALevelsHDGF;mRNALevelsSLC12A2;mRNALevelsBRPF1;mRNALevelsSKP1;mRNALevelsHIST1H3A;mRNALe…	0.0240875	7.8
PI-103	LASSO	binaryMutations	binaryMutationsRAD21;binaryMutationsAQR;binaryMutationsNRAS;binaryMutationsMYH11;binaryMutationsGNB1;binaryMutationsSRSF2;binaryMutationsPTPN11;binaryMutationsNCOA7;binaryMutationsWDR36;binaryMutationsTELO2;binaryMutationsSUCO;binaryMutationsCSF3R;binaryMutationsLRRC6;binaryMutationsADAMTS17;binaryMutationsC1orf106;binaryMutationsODF1	0.0234319	20.6
A-674563	ElasticNet	binaryMutations	binaryMutationsTRANK1;binaryMutationsNKRF;binaryMutationsAQR;binaryMutationsIDH1;binaryMutationsDYSF;binaryMutationsSLU7;binaryMutationsNRAS;binaryMutationsSLC4A2;binaryMutationsNPM1;binaryMutationsGATA2;binaryMutationsCCND3;binaryMutationsFLT3;binaryMutationsMTOR;binaryMutationsCEBPA;binaryMutationsLRBA;binaryMutationsGNB1;binaryMutationsMAP1A;binaryMutationsPRKCE;binaryMutationsKMT2A;binaryMuta…	0.023291	19.6
Ponatinib (AP24534)	LASSO	proteinLevels	proteinLevelsXPO1;proteinLevelsBSDC1;proteinLevelsTEPSIN;proteinLevelsSCAP	0.0217316	27.2	low-density lipoprotein particle receptor biosynthetic process,positive regulation of cholesterol metabolic process,positive regulation of receptor biosynthetic process,ribosomal subunit export from nucleus,SREBP signaling pathway,ribosome localization,rRNA-containing ribonucleoprotein complex export from nucleus,cellular response to sterol depletion,COPII-coated vesicle cargo loading,response to…
Ponatinib (AP24534)	LASSO	Phosphosite	PhosphositePML-S408sT409t;PhosphositePML-S504sS505s;PhosphositePLEC-S4622s;PhosphositeCAAP1-T90tS92s;PhosphositeRRAGC-S385s;PhosphositeZNHIT6-S25s	0.0170803	27.2
JNJ-28312141	ElasticNet	proteinLevels	proteinLevelsEBAG9;proteinLevelsCLIC2;proteinLevelsPRPF3;proteinLevelsRNF40;proteinLevelsBCL10;proteinLevelsGK;proteinLevelsPIK3CA;proteinLevelsPPP2CB;proteinLevelsPPP2CA;proteinLevelsCRADD;proteinLevelsFAM185A;proteinLevelsTTC17;proteinLevelsAKT1S1;proteinLevelsC16orf74;proteinLevelsNUDCD1;proteinLevelsDENND2D;proteinLevelsRPS6KB2;proteinLevelsPA2G4;proteinLevelsGGT5;proteinLevelsCCDC84;proteinL…	0.0102165	21	regulation of microtubule binding,peptidyl-serine dephosphorylation,peptidyl-threonine dephosphorylation,response to lead ion,TOR signaling
JNJ-28312141	LASSO	proteinLevels	proteinLevelsEBAG9;proteinLevelsCLIC2;proteinLevelsGK;proteinLevelsPIK3CA;proteinLevelsCRADD;proteinLevelsFAM185A;proteinLevelsTTC17;proteinLevelsAKT1S1;proteinLevelsC16orf74;proteinLevelsNUDCD1;proteinLevelsDENND2D;proteinLevelsRPS6KB2;proteinLevelsPA2G4;proteinLevelsRIC8B	0.0047619	16.8	TOR signaling
Ponatinib (AP24534)	LogisticReg	binaryMutations	binaryMutationsDYSF;binaryMutationsSLC4A2;binaryMutationsNPM1;binaryMutationsMYH11;binaryMutationsZNF76;binaryMutationsFLT3;binaryMutationsLRBA;binaryMutationsMAP1A;binaryMutationsKMT2A;binaryMutationsPTPN11;binaryMutationsNFX1;binaryMutationsATM;binaryMutationsTAF1L;binaryMutationsWDR36;binaryMutationsMYO18A;binaryMutationsMED12;binaryMutationsOSBP2;binaryMutationsCENPK;binaryMutationsSCAF1;bina…	0.00230451	23.2
Ponatinib (AP24534)	ElasticNet	binaryMutations	binaryMutationsCHD2;binaryMutationsTRANK1;binaryMutationsSART1;binaryMutationsRAD21;binaryMutationsAQR;binaryMutationsUSO1;binaryMutationsSF3B1;binaryMutationsH6PD;binaryMutationsSEC24A;binaryMutationsBAG3;binaryMutationsA2M;binaryMutationsNRAS;binaryMutationsKRT14;binaryMutationsSLC4A2;binaryMutationsNPM1;binaryMutationsPC;binaryMutationsMYH11;binaryMutationsFLT3;binaryMutationsIDH2;binaryMutati…	0.00125202	23.2	positive regulation of cell cycle,regulation of protein secretion,regulation of peptide secretion,positive regulation of cell cycle process,rhythmic process,positive regulation of secretion by cell,protein secretion,establishment of protein localization to extracellular region,protein localization to extracellular region,positive regulation of secretion,circadian rhythm,covalent chromatin modific…
Selinexor	LASSO	proteinLevels	proteinLevelsSAP30;proteinLevelsMPI;proteinLevelsSARS;proteinLevelsCPTP;proteinLevelsZCCHC8;proteinLevelsOSGEP;proteinLevelsFBXL12;proteinLevelsBCAP29;proteinLevelsSTK24;proteinLevelsNCKIPSD	0	0	ncRNA metabolic process,tRNA metabolic process,tRNA aminoacylation for protein translation,tRNA aminoacylation,amino acid activation,ncRNA processing
Staurosporine	LASSO	binaryMutations	binaryMutationsTRANK1;binaryMutationsUSO1;binaryMutationsSF3B1;binaryMutationsIDH1;binaryMutationsSLU7;binaryMutationsTP53;binaryMutationsNPM1;binaryMutationsFLT3;binaryMutationsMTOR;binaryMutationsCPT1A;binaryMutationsGTF2I;binaryMutationsRUNX1;binaryMutationsPRKCE;binaryMutationsTLR1;binaryMutationsSMG1;binaryMutationsSIGLEC9;binaryMutationsIRS2;binaryMutationsDNMT3A;binaryMutationsTET2;binaryM…	0	6	regulation of lipid catabolic process,cellular carbohydrate metabolic process,regulation of fatty acid beta-oxidation,cellular polysaccharide biosynthetic process,regulation of cellular carbohydrate metabolic process,positive regulation of lipid metabolic process,positive regulation of lipid catabolic process,polysaccharide biosynthetic process,regulation of glycogen biosynthetic process,regulati…
PP242	LogisticReg	mRNALevels;proteinLevels;binaryMutations;Phosphosite	binaryMutationsDYSF;PhosphositeSTK25-T166t;PhosphositeCANX-S554sS564sS583s;PhosphositeSTK26-T170t;PhosphositeSTK24-T182t;PhosphositeKMT2C-S2828s;PhosphositeMXRA7-S183s	0	24.6
Elesclomol	LogisticReg	mRNALevels;proteinLevels;binaryMutations;Phosphosite	mRNALevelsPAPLN;mRNALevelsZNF205;mRNALevelsPHLDA3;mRNALevelsGABBR1;PhosphositeHDGFL3-S179sS180sT189t	0	21.6
PP242	LogisticReg	proteinLevels;Phosphosite	PhosphositeEDC3-S131s;PhosphositeARMC1-S260s;PhosphositeCCDC88A-S1820s;PhosphositeRPS6KB2-S416sS417sS423s;PhosphositeSTK25-T166t;PhosphositeATF2-S136s;PhosphositeCANX-S554sS564sS583s;PhosphositeSTK26-T170t;PhosphositeSTK24-T182t;PhosphositeKMT2C-S2828s;PhosphositeMXRA7-S183s	0	24.6
Selumetinib (AZD6244)	LogisticReg	proteinLevels;Phosphosite	proteinLevelsBCL2;proteinLevelsCD163;proteinLevelsRTF1;PhosphositeGMIP-S907s	0	23.4
Ponatinib (AP24534)	LogisticReg	mRNALevels	mRNALevelsLDHC;mRNALevelsTTC12;mRNALevelsHDX;mRNALevelsINPP5J	0	17.6	negative regulation of microtubule polymerization,lactate metabolic process,inositol phosphate dephosphorylation,phosphorylated carbohydrate dephosphorylation,inositol phosphate catabolic process,polyol catabolic process,negative regulation of peptidyl-serine phosphorylation,phosphatidylinositol dephosphorylation,negative regulation of microtubule polymerization or depolymerization,phospholipid d…
Sorafenib	LogisticReg	mRNALevels	mRNALevelsDAPL1;mRNALevelsKRT81;mRNALevelsLINC00535	0	8.6	cellular response to amino acid starvation,response to amino acid starvation,negative regulation of autophagy,cornification,cellular response to starvation,response to starvation,cellular response to nutrient levels,keratinization,cellular response to extracellular stimulus,negative regulation of cellular catabolic process,keratinocyte differentiation,negative regulation of catabolic process,cell…
BEZ235	LogisticReg	proteinLevels	proteinLevelsGGCT;proteinLevelsIGLV3-27;proteinLevelsITGB1;proteinLevelsCCL5;proteinLevelsC18orf21;proteinLevelsKDM1B;proteinLevelsZNF268;proteinLevelsPARP6	0	24.4	cell-cell adhesion mediated by integrin
PP242	LogisticReg	Phosphosite	PhosphositeEDC3-S131s;PhosphositeARMC1-S260s;PhosphositeCCDC88A-S1820s;PhosphositeRPS6KB2-S416sS417sS423s;PhosphositeSTK25-T166t;PhosphositeATF2-S136s;PhosphositeCANX-S554sS564sS583s;PhosphositeSTK26-T170t;PhosphositeSTK24-T182t;PhosphositeKMT2C-S2828s;PhosphositeMXRA7-S183s	0	24.6
JNJ-28312141	LASSO	mRNALevels;proteinLevels;binaryMutations;Phosphosite	proteinLevelsAKT1S1;proteinLevelsNUDCD1;PhosphositeMED24-S873s;PhosphositeARHGEF6-S124s;PhosphositeCCSAP-S240s;PhosphositeCAAP1-T90tS92s;PhosphositePRAM1-S303s	-0.00238095	21.4
Foretinib (XL880)	ElasticNet	binaryMutations	binaryMutationsCHD2;binaryMutationsTRANK1;binaryMutationsNKRF;binaryMutationsSART1;binaryMutationsURB1;binaryMutationsAQR;binaryMutationsUSO1;binaryMutationsSF3B1;binaryMutationsTRIO;binaryMutationsSLU7;binaryMutationsH6PD;binaryMutationsSEC24A;binaryMutationsBAG3;binaryMutationsA2M;binaryMutationsNRAS;binaryMutationsKRAS;binaryMutationsTP53;binaryMutationsSLC4A2;binaryMutationsNPM1;binaryMutatio…	-0.00310717	20.6	developmental growth involved in morphogenesis,regulation of axonogenesis,spinal cord development,positive regulation of protein transport,synapse organization,positive regulation of establishment of protein localization,regulation of peptide secretion,regulation of cell morphogenesis involved in differentiation,regulation of extent of cell growth,homophilic cell adhesion via plasma membrane adhe…
17-AAG (Tanespimycin)	ElasticNet	mRNALevels;proteinLevels;binaryMutations;Phosphosite	mRNALevelsCOBL;mRNALevelsCCL7;mRNALevelsC4BPB;mRNALevelsSLCO5A1;mRNALevelsCRHBP;mRNALevelsCCDC15;mRNALevelsFUT7;mRNALevelsABHD17AP5;mRNALevelsRPS26P11;mRNALevelsRPS26P3;mRNALevelsIQCB2P;mRNALevelsRPS26P15;mRNALevelsAC009133.15;mRNALevelsRP11-529J17.3;proteinLevelsMPG;proteinLevelsMLLT1;proteinLevelsMVK;proteinLevelsSF3B4;proteinLevelsNFE2;proteinLevelsHSDL1;proteinLevelsEXOC8;proteinLevelsPDRG1;p…	-0.0044289	30.4
Cabozantinib	LogisticReg	proteinLevels;Phosphosite	proteinLevelsCLIC2;proteinLevelsGCSH;proteinLevelsLRRC41;proteinLevelsAIF1L;PhosphositeEIF4B-S497sS498s;PhosphositeHIRA-S549s;PhosphositeSRCAP-S2790s;PhosphositeMMTAG2-S216sS217sS220s;PhosphositeNRDC-S94sS96s;PhosphositeRTF1-Y703y;PhosphositeACIN1-S208sS210sS216s	-0.00557442	22.4
Flavopiridol	LASSO	binaryMutations	binaryMutationsKMT2D;binaryMutationsAQR;binaryMutationsUSO1;binaryMutationsEED;binaryMutationsSF3B1;binaryMutationsTRIO;binaryMutationsBAG3;binaryMutationsKRAS;binaryMutationsKRT14;binaryMutationsTP53;binaryMutationsPC;binaryMutationsCBL;binaryMutationsGATA2;binaryMutationsFLT3;binaryMutationsCDKN2A;binaryMutationsSTT3A;binaryMutationsIDH2;binaryMutationsCEBPA;binaryMutationsJAK3;binaryMutationsG…	-0.00610266	14.4	regulation of pri-miRNA transcription by RNA polymerase II,pri-miRNA transcription by RNA polymerase II,covalent chromatin modification,histone H3-K4 methylation,histone lysine methylation,positive regulation of cell aging,peptidyl-lysine methylation,cellular response to abiotic stimulus,cellular response to environmental stimulus,histone methylation,response to radiation,response to ionizing rad…
Cabozantinib	ElasticNet	Phosphosite	PhosphositeAGPS-S65s;PhosphositeEEF2K-T348t;PhosphositeCREB1-S89s;PhosphositeEIF4B-S497sS498s;PhosphositeMDH1-S241s;PhosphositeRPL34-S12s;PhosphositeAGFG1-S181s;PhosphositeMAP1A-S1675s;PhosphositeMAP1A-S1218s;PhosphositeSPTBN1-T2331t;PhosphositeKMT2A-S183s;PhosphositeARHGEF6-S124s;PhosphositeLRIF1-S502s;PhosphositeCAMSAP1-S563s;PhosphositeMAP1S-S592s;PhosphositeHAUS6-S943s;PhosphositeDDB2-S24sS26…	-0.0090676	22.4
Ponatinib (AP24534)	LASSO	binaryMutations	binaryMutationsCHD2;binaryMutationsTRANK1;binaryMutationsSART1;binaryMutationsRAD21;binaryMutationsAQR;binaryMutationsUSO1;binaryMutationsSF3B1;binaryMutationsH6PD;binaryMutationsSEC24A;binaryMutationsA2M;binaryMutationsNRAS;binaryMutationsSLC4A2;binaryMutationsNPM1;binaryMutationsMYH11;binaryMutationsFLT3;binaryMutationsIDH2;binaryMutationsCEBPA;binaryMutationsLRBA;binaryMutationsGNB1;binaryMuta…	-0.0126447	19.2
PP242	LASSO	mRNALevels	mRNALevelsMPP6;mRNALevelsSNX6;mRNALevelsRHBDF1;mRNALevelsGLULP4;mRNALevelsCTB-134H23.2;mRNALevelsADAM32;mRNALevelsSNORD15B;mRNALevelsMT-TP;mRNALevelsRP11-819M15.1;mRNALevelsNPM1P33;mRNALevelsSMIM2-AS1;mRNALevelsKB-318B8.7;mRNALevelsRP11-59D5__B.2;mRNALevelsCTD-2013N24.2;mRNALevelsCTD-2083E4.6;mRNALevelsPKD1P5;mRNALevelsRP11-12J10.3;mRNALevelsRP11-715J22.2;mRNALevelsKB-226F1.2	-0.0153604	19.2	regulation of epidermal growth factor receptor signaling pathway,regulation of ERBB signaling pathway,epidermal growth factor receptor signaling pathway,ERBB signaling pathway
Entrectinib	LASSO	proteinLevels	proteinLevelsSEC22B;proteinLevelsMBD4;proteinLevelsAPOE;proteinLevelsCBR1;proteinLevelsGK;proteinLevelsCLK3;proteinLevelsPSMA6;proteinLevelsPSMD5;proteinLevelsCENPW;proteinLevelsZNF598;proteinLevelsACBD3;proteinLevelsANAPC10;proteinLevelsATP6V0A2;proteinLevelsN6AMT1;proteinLevelsTEPSIN;proteinLevelsMB	-0.02	8.4	antigen processing and presentation of exogenous peptide antigen via MHC class I, TAP-dependent,antigen processing and presentation of exogenous peptide antigen via MHC class I,anaphase-promoting complex-dependent catabolic process,antigen processing and presentation of peptide antigen via MHC class I,response to oxygen levels,antigen processing and presentation of exogenous peptide antigen,negat…
PP242	LASSO	mRNALevels;proteinLevels;binaryMutations;Phosphosite	mRNALevelsRP1-29C18.8;mRNALevelsMIR5192;proteinLevelsCARMIL2;PhosphositeLMNA-S429s;PhosphositeRUNX1-T14tT18t;PhosphositeEEPD1-S16sS19s;PhosphositeRALGPS2-T361t;PhosphositeNF1-S2543s	-0.02669	29.6
INK-128	LASSO	Phosphosite	PhosphositeHNRNPA2B1-S318s;PhosphositeSRSF6-S45s;PhosphositeMAP7D1-S113sS116s;PhosphositeINPP5D-S960sT963t;PhosphositeBCL3-S41s;PhosphositeRAB25-S79s	-0.0293939	25.2
Cabozantinib	LogisticReg	mRNALevels;proteinLevels;binaryMutations;Phosphosite	mRNALevelsDAPL1;mRNALevelsITGA11;PhosphositeGLUL-S343s;PhosphositeHIRA-S549s;PhosphositeKIDINS220-T1682t;PhosphositeSRCAP-S2790s;PhosphositeMMTAG2-S216sS217sS220s;PhosphositePHF2-S1058s;PhosphositeRTF1-Y703y	-0.0305034	22.4
Selinexor	ElasticNet	proteinLevels;Phosphosite	proteinLevelsIGKV3D-11;proteinLevelsMPI;proteinLevelsIGHMBP2;proteinLevelsCD151;proteinLevelsRAB14;proteinLevelsTUBA4A;proteinLevelsCPTP;proteinLevelsZCCHC8;proteinLevelsOSGEP;proteinLevelsFBXL12;proteinLevelsTUBA8;proteinLevelsBCAP29;proteinLevelsCORO1C;proteinLevelsSTK24;proteinLevelsNCKIPSD;PhosphositeCCNT2-S480s;PhosphositeXYLB-S354s;PhosphositeFGFR1OP-S152sS156s;PhosphositeLMNA-S406sS407s;Ph…	-0.0314286	12.2
Dovitinib (CHIR-258)	LASSO	Phosphosite	PhosphositeTOR1AIP1-S135sS143s;PhosphositeINPP5D-S1085s;PhosphositeASAP1-S1041s;PhosphositeTEX2-S196s;PhosphositeLEO1-S296sT302t;PhosphositeIFI16-S568s	-0.0325175	22.4
Selinexor	ElasticNet	mRNALevels;proteinLevels;binaryMutations;Phosphosite	proteinLevelsIGKV3D-11;proteinLevelsMPI;proteinLevelsIGHMBP2;proteinLevelsCD151;proteinLevelsRAB14;proteinLevelsTUBA4A;proteinLevelsCPTP;proteinLevelsZCCHC8;proteinLevelsOSGEP;proteinLevelsFBXL12;proteinLevelsTUBA8;proteinLevelsBCAP29;proteinLevelsCORO1C;proteinLevelsSTK24;proteinLevelsNCKIPSD;PhosphositeCCNT2-S480s;PhosphositeXYLB-S354s;PhosphositeFGFR1OP-S152sS156s;PhosphositeLMNA-S406sS407s;Ph…	-0.0342857	12.2
Trametinib (GSK1120212)	LASSO	mRNALevels	mRNALevelsMROH1;mRNALevelsCHST7;mRNALevelsGEN1;mRNALevelsABHD17AP5;mRNALevelsCALM2P3;mRNALevelsCTC-463N11.1	-0.0347048	15.6	regulation of spindle checkpoint,regulation of mitotic cell cycle spindle assembly checkpoint,regulation of mitotic spindle checkpoint,N-acetylglucosamine metabolic process,mitotic recombination,chondroitin sulfate biosynthetic process,glucosamine-containing compound metabolic process,chondroitin sulfate proteoglycan biosynthetic process,regulation of cell cycle checkpoint,mitotic spindle assembl…
SNS-032 (BMS-387032)	ElasticNet	Phosphosite	PhosphositeSTX7-S45s;PhosphositeZNF217-T648t;PhosphositeSP100-S193s;PhosphositeKDM5C-S299sS301s;PhosphositeAKAP17A-S638sT639tS640s;PhosphositeIFI16-S153s;PhosphositeCEP135-S303s;PhosphositeNDRG1-S330s;PhosphositePPP1R14A-S128sS130sS134s;PhosphositeWAC-S520sS523sS525s;PhosphositeRRAGC-S382s;PhosphositeTSC22D4-S279s;PhosphositeBRPF3-S26s;PhosphositeIBTK-S1045s;PhosphositeRAB25-S79s;PhosphositeZNF59…	-0.0380886	30.4
Selinexor	LASSO	mRNALevels;proteinLevels;binaryMutations;Phosphosite	proteinLevelsMPI;proteinLevelsFBXL12;proteinLevelsBCAP29;proteinLevelsSTK24;proteinLevelsNCKIPSD;PhosphositeMAPK3-Y204y;PhosphositeAHNAK-S5749sS5752s;PhosphositeLATS1-S464s;PhosphositeSTRN-S227s;PhosphositeAHNAK-T5794t;PhosphositeEFR3A-S222s;PhosphositePPIP5K1-S987s;PhosphositeZC3H7A-S738s;PhosphositeVCPIP1-S1132s;PhosphositeCHAMP1-S145s	-0.04	3
Staurosporine	LASSO	Phosphosite	PhosphositeCD44-S697s;PhosphositeCD44-S216s;PhosphositeKIF21A-S855s;PhosphositeSLC25A46-S37sT45t;PhosphositePAXX-S152s;PhosphositeSLK-S818s;PhosphositeSRRM2-S1497sS1499s;PhosphositePIEZO1-S1646s	-0.04	5
Entrectinib	LASSO	Phosphosite	PhosphositeFCHO1-T574tS576s;PhosphositeRNF113A-S45sS46sS47s;PhosphositeMCM3-T713t;PhosphositeFXR1-S409sT411t;PhosphositeDOCK8-S451sS459s;PhosphositeTRIM11-S85s;PhosphositeNCOA2-S266sT272t;PhosphositeODF2-S814sS826s;PhosphositeINTS3-S1015sS1016sT1023t;PhosphositeIRF2BPL-S662s;PhosphositeSYNRG-S772s;PhosphositeLMO7-S1423s	-0.04	8
SNS-032 (BMS-387032)	LASSO	Phosphosite	PhosphositeSTX7-S45s;PhosphositeZNF217-T648t;PhosphositeAKAP17A-S638sT639tS640s;PhosphositeSPTAN1-S1323s;PhosphositeRRAGC-S382s;PhosphositeTSC22D4-S279s;PhosphositeIBTK-S1045s;PhosphositeRAB25-S79s;PhosphositeZNF592-S459sS460s;PhosphositeRTN4-S121sS129s;PhosphositeHSPA8-S541s;PhosphositeRBMX-Y214y;PhosphositeRBMXL1-Y214y	-0.0407692	30.4
Staurosporine	ElasticNet	binaryMutations	binaryMutationsTRANK1;binaryMutationsUSO1;binaryMutationsSF3B1;binaryMutationsIDH1;binaryMutationsSLU7;binaryMutationsTP53;binaryMutationsNPM1;binaryMutationsFLT3;binaryMutationsMTOR;binaryMutationsCPT1A;binaryMutationsGTF2I;binaryMutationsRUNX1;binaryMutationsPRKCE;binaryMutationsTLR1;binaryMutationsEZH2;binaryMutationsNFE2;binaryMutationsSIRPB2;binaryMutationsUBE2J2;binaryMutationsUSP9X;binaryM…	-0.0421637	4.4	regulation of lipid catabolic process,regulation of fatty acid beta-oxidation,cellular carbohydrate metabolic process,cellular polysaccharide biosynthetic process,positive regulation of lipid catabolic process,developmental cell growth,regulation of cellular carbohydrate metabolic process,polysaccharide biosynthetic process,regulation of glycogen biosynthetic process,regulation of glucan biosynth…
GDC-0941	LASSO	binaryMutations	binaryMutationsCHD2;binaryMutationsKMT2D;binaryMutationsNKRF;binaryMutationsURB1;binaryMutationsAQR;binaryMutationsUSO1;binaryMutationsEED;binaryMutationsTRIO;binaryMutationsSLU7;binaryMutationsBAG3;binaryMutationsNRAS;binaryMutationsKRAS;binaryMutationsITGB5;binaryMutationsGATA2;binaryMutationsMYH11;binaryMutationsZNF76;binaryMutationsMAP1B;binaryMutationsCPT1A;binaryMutationsJAK3;binaryMutation…	-0.0450831	19.6	retina layer formation
Foretinib (XL880)	LASSO	proteinLevels;Phosphosite	proteinLevelsKMT2D;proteinLevelsCLIC2;proteinLevelsMBD4;proteinLevelsFLT3;proteinLevelsFAM3A;proteinLevelsINPP5D;proteinLevelsPOMT2;PhosphositeMTSS1-S272s;PhosphositeTCEA1-S114s;PhosphositeDNMT1-S143s;PhosphositeDNMT1-S22s;PhosphositeMRE11-S688sS689s;PhosphositeLRBA-S1133sS1135s;PhosphositeILF3-S810s;PhosphositeATR-S435sS436s;PhosphositeRBM39-S136s;PhosphositeRIPOR1-S711s;PhosphositeMICALL1-S471s…	-0.0533333	19.2
Selumetinib (AZD6244)	LogisticReg	binaryMutations	binaryMutationsSF3B1;binaryMutationsKRAS;binaryMutationsTLN2;binaryMutationsFAM194A	-0.0555556	19.6	regulation of Rac protein signal transduction,positive regulation of cellular senescence,positive regulation of nitric-oxide synthase activity,positive regulation of cell aging,regulation of long-term neuronal synaptic plasticity,homeostasis of number of cells within a tissue,epithelial tube branching involved in lung morphogenesis,positive regulation of monooxygenase activity,response to mineral…
Flavopiridol	LASSO	proteinLevels;Phosphosite	proteinLevelsNCOR1;proteinLevelsEZR;proteinLevelsTFEB;proteinLevelsAPTX;proteinLevelsMOB3A;proteinLevelsRASSF1;proteinLevelsNHP2;proteinLevelsSTX18;PhosphositeDDX3X-S90s;PhosphositeSNRPA1-S197s;PhosphositeEPB41-S709s;PhosphositeCDK2-Y19y;PhosphositeTMPO-T160t;PhosphositeGABARAPL2-S10s;PhosphositePLEC-T4030t;PhosphositeSYTL3-S231s;PhosphositeGBF1-S1781sS1784s;PhosphositeKIAA1143-S116s;PhosphositeP…	-0.0594102	29.6
Staurosporine	ElasticNet	proteinLevels;Phosphosite	proteinLevelsATG4A;PhosphositeCD44-S697s;PhosphositeCD44-S216s;PhosphositeKIF21A-S855s;PhosphositeSLC25A46-S37sT45t;PhosphositePAXX-S152s;PhosphositeSRRM2-S1497sS1499s;PhosphositePIEZO1-S1646s	-0.06	4.8
Venetoclax	LASSO	proteinLevels	proteinLevelsGSR;proteinLevelsCRP;proteinLevelsC4B;proteinLevelsRRAS;proteinLevelsEZR;proteinLevelsTCEA1;proteinLevelsGNG11;proteinLevelsSAFB2;proteinLevelsKYAT1;proteinLevelsLYPLAL1;proteinLevelsDNAJA4;proteinLevelsCMBL;proteinLevelsHSH2D;proteinLevelsNSMCE3;proteinLevelsSH3GL1;proteinLevelsMCMBP;proteinLevelsHDAC8;proteinLevelsKIF13B;proteinLevelsSARDH;proteinLevelsHMGA2	-0.067619	19.2	opsonization
Trametinib (GSK1120212)	LASSO	mRNALevels;proteinLevels;binaryMutations;Phosphosite	mRNALevelsC1orf106;mRNALevelsABHD17AP5;mRNALevelsSNORD20;mRNALevelsTECRP2;mRNALevelsCTC-463N11.1;mRNALevelsRP11-69M1.3;mRNALevelsRP11-478B9.3;proteinLevelsBCL2;proteinLevelsCASP2;proteinLevelsTTC37;proteinLevelsAPTX;proteinLevelsSPART;proteinLevelsSTOML3;proteinLevelsBLOC1S4;proteinLevelsC9orf85;proteinLevelsIFI27L2;PhosphositePDCD5-S51s;PhosphositeSGTA-S301sS307s;PhosphositeCCNT2-S480s;Phosphosi…	-0.0690676	30.4
Cabozantinib	LASSO	Phosphosite	PhosphositeMAP1A-S1675s;PhosphositeARHGEF6-S124s;PhosphositeHAUS6-S943s;PhosphositeHIRIP3-S125s;PhosphositeMAK16-S229sS232s;PhosphositeADNP-S424s	-0.072028	22.4
GDC-0941	ElasticNet	Phosphosite	PhosphositePDLIM1-S90s;PhosphositeNOP56-S570s;PhosphositePPP1R12A-S140s;PhosphositePRKAB2-S184s;PhosphositeSRGAP2-S427s;PhosphositeNCOR1-S509s;PhosphositeLYL1-S260s;PhosphositePTPN1-S352s;PhosphositeYLPM1-S1100s;PhosphositePRKCQ-S676s;PhosphositeAKAP13-T953t;PhosphositePAK2-S141s;PhosphositeSRSF6-S45s;PhosphositeGOLGA4-S71s;PhosphositeMORC3-S765s;PhosphositeCCDC88A-S1561s;PhosphositeVIRMA-S1579s;…	-0.0765301	28.8
Selinexor	LogisticReg	mRNALevels	mRNALevelsMTHFD2;mRNALevelsTMPRSS13;mRNALevelsRP11-121L10.3;mRNALevelsAP000476.1	-0.0800198	4.4	tetrahydrofolate interconversion,tetrahydrofolate metabolic process,folic acid metabolic process,folic acid-containing compound metabolic process,pteridine-containing compound metabolic process,one-carbon metabolic process,water-soluble vitamin metabolic process,dicarboxylic acid metabolic process,vitamin metabolic process,cellular modified amino acid metabolic process
A-674563	LASSO	Phosphosite	PhosphositeARL6IP4-S47s;PhosphositeST13P5-T76tS79s;PhosphositeEIF4G3-S495s	-0.0814685	28.8
Trametinib (GSK1120212)	ElasticNet	mRNALevels	mRNALevelsMROH1;mRNALevelsPIGQ;mRNALevelsCHST7;mRNALevelsGEN1;mRNALevelsABHD17AP5;mRNALevelsCALM2P3;mRNALevelsCTC-463N11.1	-0.0817852	20	regulation of spindle checkpoint,regulation of mitotic cell cycle spindle assembly checkpoint,regulation of mitotic spindle checkpoint,preassembly of GPI anchor in ER membrane,N-acetylglucosamine metabolic process,mitotic recombination,chondroitin sulfate biosynthetic process,glucosamine-containing compound metabolic process,chondroitin sulfate proteoglycan biosynthetic process,GPI anchor biosynt…
Sorafenib	LASSO	mRNALevels	mRNALevelsPTBP3;mRNALevelsANKRD12;mRNALevelsAF064858.6;mRNALevelsRP11-338C15.3;mRNALevelsLINC00908	-0.0826884	11.8	erythrocyte maturation,negative regulation of mRNA splicing, via spliceosome,negative regulation of RNA splicing,negative regulation of mRNA processing,erythrocyte development,myeloid cell development,negative regulation of mRNA metabolic process,regulation of mRNA splicing, via spliceosome,erythrocyte differentiation,erythrocyte homeostasis,regulation of mRNA processing,myeloid cell homeostasis,…
Trametinib (GSK1120212)	ElasticNet	mRNALevels;proteinLevels;binaryMutations;Phosphosite	mRNALevelsGEN1;mRNALevelsABHD17AP5;mRNALevelsSNORD20;mRNALevelsCALM2P3;mRNALevelsRP11-383G6.4;mRNALevelsCTC-463N11.1;proteinLevelsBCL2;proteinLevelsCASP2;proteinLevelsSKIV2L;proteinLevelsTTC37;proteinLevelsSPART;PhosphositePDCD5-S51s;PhosphositeZFP36L1-S54s;PhosphositeMORC3-S560s;PhosphositeF11R-S284sS287s	-0.091352	30.4
Flavopiridol	ElasticNet	binaryMutations	binaryMutationsKMT2D;binaryMutationsTRANK1;binaryMutationsSART1;binaryMutationsDIAPH1;binaryMutationsUSO1;binaryMutationsEED;binaryMutationsSF3B1;binaryMutationsTRIO;binaryMutationsBAG3;binaryMutationsKRAS;binaryMutationsKRT14;binaryMutationsTP53;binaryMutationsPC;binaryMutationsCBL;binaryMutationsGATA2;binaryMutationsRFC1;binaryMutationsMYH11;binaryMutationsFLT3;binaryMutationsCDKN2A;binaryMutat…	-0.0917325	24.8	covalent chromatin modification,ear development,histone methylation,spinal cord development,inner ear development,histone modification,homeostasis of number of cells within a tissue,nephric duct morphogenesis,peptidyl-tyrosine phosphorylation,cellular response to fatty acid,response to fatty acid,chromatin remodeling,peptidyl-tyrosine modification,regulation of peptide secretion
Entrectinib	ElasticNet	proteinLevels	proteinLevelsTARSL2;proteinLevelsMCRIP1;proteinLevelsBCKDK;proteinLevelsMGST3;proteinLevelsPRMT3;proteinLevelsCNOT3;proteinLevelsSIN3B;proteinLevelsSEC22B;proteinLevelsTRAPPC6A;proteinLevelsKDM4B;proteinLevelsMBD4;proteinLevelsPTBP3;proteinLevelsMT-CO2;proteinLevelsCP;proteinLevelsAPOA1;proteinLevelsAPOE;proteinLevelsAPOA2;proteinLevelsTTR;proteinLevelsTF;proteinLevelsC4BPA;proteinLevelsGSTM1;pro…	-0.1	11	post-translational protein modification,alcohol metabolic process,very-low-density lipoprotein particle remodeling,chylomicron assembly,cholesterol metabolic process,phospholipid efflux,triglyceride-rich lipoprotein particle remodeling,secondary alcohol metabolic process,cellular detoxification,regulation of cholesterol esterification,sterol metabolic process,phosphatidylcholine biosynthetic proc…
PI-103	ElasticNet	binaryMutations	binaryMutationsRAD21;binaryMutationsAQR;binaryMutationsNRAS;binaryMutationsMYH11;binaryMutationsGNB1;binaryMutationsSRSF2;binaryMutationsPTPN11;binaryMutationsNCOA7;binaryMutationsWDR36;binaryMutationsTELO2;binaryMutationsNFE2L3;binaryMutationsSUCO;binaryMutationsKAT2B;binaryMutationsEPHA4;binaryMutationsCSF3R;binaryMutationsLRRC6;binaryMutationsADAMTS17;binaryMutationsC1orf106;binaryMutationsZNF…	-0.113602	24.8
Ponatinib (AP24534)	LASSO	proteinLevels;Phosphosite	PhosphositePML-S408sT409t;PhosphositePML-S504sS505s;PhosphositePLEC-S4622s;PhosphositeCAAP1-T90tS92s;PhosphositeZNHIT6-S25s	-0.129913	27.2
Ponatinib (AP24534)	LogisticReg	proteinLevels	proteinLevelsCLIC2;proteinLevelsPRKRA;proteinLevelsPSMA6;proteinLevelsEIPR1;proteinLevelsVRK3	-0.131245	27.2
Venetoclax	LogisticReg	proteinLevels	proteinLevelsGNPDA1;proteinLevelsPAK1;proteinLevelsPAK2;proteinLevelsKYAT1;proteinLevelsMCEMP1;proteinLevelsSH3GL1;proteinLevelsMCMBP;proteinLevelsPOLG2;proteinLevelsSARDH;proteinLevelsCBLB;proteinLevelsSERAC1	-0.132365	19.2	peptidyl-serine phosphorylation,peptidyl-serine modification,cellular biogenic amine catabolic process,amine catabolic process,negative regulation of protein kinase activity,T cell costimulation,cellular biogenic amine metabolic process,lymphocyte costimulation,negative regulation of kinase activity,organic acid catabolic process,carboxylic acid catabolic process,negative regulation of transferas…
Trametinib (GSK1120212)	LASSO	proteinLevels	proteinLevelsSTX16;proteinLevelsSIVA1;proteinLevelsDAPK3;proteinLevelsPCF11;proteinLevelsSKI;proteinLevelsPCMT1;proteinLevelsCASP2;proteinLevelsMVK;proteinLevelsRPL18;proteinLevelsMOGS;proteinLevelsSKIV2L;proteinLevelsC2orf76;proteinLevelsGCSAML;proteinLevelsZNF660;proteinLevelsUQCC3;proteinLevelsSPART;proteinLevelsVPS8;proteinLevelsARFGAP2;proteinLevelsGDPD1;proteinLevelsPLBD2;proteinLevelsSTOML…	-0.137669	30.4	respiratory chain complex III assembly,mitochondrial respiratory chain complex III assembly
Sorafenib	ElasticNet	mRNALevels	mRNALevelsDAPL1;mRNALevelsZNF609;mRNALevelsBNIP3L;mRNALevelsMTRF1;mRNALevelsPTBP3;mRNALevelsALDH1A3;mRNALevelsGLIPR1;mRNALevelsCASP4;mRNALevelsNFIX;mRNALevelsMAPRE2;mRNALevelsIGFBP7;mRNALevelsFSCN1;mRNALevelsPOC1B;mRNALevelsNT5C;mRNALevelsHNRNPLL;mRNALevelsS100Z;mRNALevelsCDKN2AIPNL;mRNALevelsLSM14B;mRNALevelsLAT2;mRNALevelsDUSP22;mRNALevelsTMOD2;mRNALevelsHEATR5B;mRNALevelsSTAP1;mRNALevelsAKT3;m…	-0.140241	20
Foretinib (XL880)	LASSO	Phosphosite	PhosphositeCREB1-S89s;PhosphositeDNMT1-S143s;PhosphositeMRE11-S688sS689s;PhosphositeLRBA-S1133sS1135s;PhosphositeRBM10-S60sS61sS65s;PhosphositeGTF3C1-S1653s;PhosphositeATR-S435sS436s;PhosphositeNCAPD2-S1333s;PhosphositeARHGEF6-S124s;PhosphositeMED1-S1042sS1049sT1051t;PhosphositeUSP28-S375s;PhosphositeRIOK2-T485tS489s;PhosphositeAP1M1-T223t;PhosphositePRR12-S96s;PhosphositeCCSAP-S80s;PhosphositePC…	-0.141981	24.2
Panobinostat	ElasticNet	proteinLevels	proteinLevelsGSR;proteinLevelsCD9;proteinLevelsPTPN12;proteinLevelsDIP2A;proteinLevelsELOC;proteinLevelsMCU;proteinLevelsSH3GL1;proteinLevelsLILRB2;proteinLevelsTM7SF3	-0.145714	12.8
Trametinib (GSK1120212)	ElasticNet	binaryMutations	binaryMutationsKMT2D;binaryMutationsZNF292;binaryMutationsUSO1;binaryMutationsSF3B1;binaryMutationsDYSF;binaryMutationsTRIO;binaryMutationsTP53;binaryMutationsF5;binaryMutationsGATA2;binaryMutationsRPL29;binaryMutationsTSC2;binaryMutationsCPT1A;binaryMutationsJAK3;binaryMutationsATXN3;binaryMutationsGNB1;binaryMutationsGTF2I;binaryMutationsRUNX1;binaryMutationsMLLT1;binaryMutationsPTPN11;binaryMu…	-0.153148	25.6
Venetoclax	ElasticNet	proteinLevels;Phosphosite	proteinLevelsSDCBP;proteinLevelsDPYSL4;proteinLevelsLYRM1;proteinLevelsPRKRA;proteinLevelsGSR;proteinLevelsCRP;proteinLevelsCSTB;proteinLevelsC4A;proteinLevelsC4B;proteinLevelsRRAS;proteinLevelsEZR;proteinLevelsPOR;proteinLevelsFAS;proteinLevelsBLVRB;proteinLevelsGNPDA1;proteinLevelsMRE11;proteinLevelsRENBP;proteinLevelsFCGRT;proteinLevelsSAFB2;proteinLevelsLYPLAL1;proteinLevelsRPAP2;proteinLevel…	-0.158095	19.2
SNS-032 (BMS-387032)	LogisticReg	Phosphosite	PhosphositeATF2-S310sT323t;PhosphositeTCEA1-S135s;PhosphositeSTXBP5-S719sS723s;PhosphositeWASHC2A-S333s;PhosphositeBOD1L1-S482s;PhosphositePPP1R14A-S128sS130sS134s;PhosphositeSH3KBP1-S230s;PhosphositeREEP4-T196tS202sT204t;PhosphositeTSC22D4-S279s;PhosphositeIBTK-S1045s;PhosphositeAKAP2-S785s;PhosphositeRPS6KA4-S721s;PhosphositeEEF2-T57tT59t;PhosphositeGTF3C1-S1868s;PhosphositeMCM2-S41sS53s	-0.158227	30.4
Staurosporine	ElasticNet	mRNALevels	mRNALevelsSNX2;mRNALevelsZFPL1;mRNALevelsPC;mRNALevelsATP5O;mRNALevelsNAPA;mRNALevelsPRKAA1;mRNALevelsUBXN2B;mRNALevelsATXN7L3;mRNALevelsNCOA1;mRNALevelsEML3;mRNALevelsSPECC1;mRNALevelsSTEAP3;mRNALevelsOLFM4;mRNALevelsUBE2Q1;mRNALevelsSLFN11;mRNALevelsTSR2;mRNALevelsINPP4A;mRNALevelsHNRNPUL1;mRNALevelsPITHD1;mRNALevelsUCK1;mRNALevelsBABAM1;mRNALevelsNDE1;mRNALevelsATG4B;mRNALevelsDIAPH2;mRNALevel…	-0.16	2.8
Entrectinib	ElasticNet	mRNALevels;proteinLevels;binaryMutations;Phosphosite	proteinLevelsMGST3;proteinLevelsPRMT3;proteinLevelsSEC22B;proteinLevelsKDM4B;proteinLevelsMBD4;proteinLevelsGOSR1;proteinLevelsC4A;proteinLevelsC4B;proteinLevelsCD99;proteinLevelsCBR1;proteinLevelsCSNK2A2;proteinLevelsVARS;proteinLevelsGK;proteinLevelsEIF1AX;proteinLevelsCLK3;proteinLevelsPSMA6;proteinLevelsSCRN3;proteinLevelsTSPAN31;proteinLevelsGK2;proteinLevelsPSMD5;proteinLevelsCENPW;proteinL…	-0.16	11
Venetoclax	LogisticReg	Phosphosite	PhosphositeGAPDH-S210s;PhosphositeTP53BP1-S659sS660sS662s;PhosphositePPIG-S413sS415s;PhosphositePPA2-S317s;PhosphositeNADK-S48s	-0.161849	19.2
Ponatinib (AP24534)	ElasticNet	proteinLevels;Phosphosite	proteinLevelsXPO1;proteinLevelsRIPK2;proteinLevelsPRKRA;proteinLevelsTRIM16;proteinLevelsTHOP1;proteinLevelsHCCS;proteinLevelsPSMD5;proteinLevelsINPP5D;proteinLevelsMRPS18A;proteinLevelsBSDC1;proteinLevelsRPS6KB2;proteinLevelsTEPSIN;proteinLevelsSCAP;proteinLevelsRABL2A;PhosphositeC2CD2L-S613sS619s;PhosphositeAP3D1-S658s;PhosphositeARHGAP6-S330sT337t;PhosphositeHNRNPR-S23s;PhosphositeDDX5-S520s;P…	-0.170087	27.2
17-AAG (Tanespimycin)	ElasticNet	Phosphosite	PhosphositeSF3B1-S194s;PhosphositeSVIL-S968s;PhosphositeZKSCAN1-S289s;PhosphositeTALDO1-S237s;PhosphositeRBM10-S60sS61sS65s;PhosphositeRUNX1-S21s;PhosphositeWASHC2A-S1144s;PhosphositeJADE1-S703s;PhosphositeZC3H14-S409s;PhosphositeMEPCE-T213tS217s;PhosphositeERMP1-S53s;PhosphositeMICALL1-S471s;PhosphositeSH2D3C-S440s;PhosphositeNCOA7-S505s;PhosphositePUM2-S82s;PhosphositeINPP5D-S960sT963t;Phosphos…	-0.171865	30.4
Venetoclax	LASSO	proteinLevels;Phosphosite	proteinLevelsSDCBP;proteinLevelsDPYSL4;proteinLevelsPRKRA;proteinLevelsGSR;proteinLevelsC4A;proteinLevelsC4B;proteinLevelsRRAS;proteinLevelsBLVRB;proteinLevelsSTAT3;proteinLevelsSAFB2;proteinLevelsMCU;proteinLevelsTSPAN14;proteinLevelsDNAJA4;proteinLevelsHSH2D;proteinLevelsMCMBP;proteinLevelsNLRC4;proteinLevelsKIF13B;proteinLevelsENTPD1;PhosphositeCLASP2-S774s;PhosphositeATRX-S925s;PhosphositeRNF…	-0.172381	19.2
Selinexor	ElasticNet	binaryMutations	binaryMutationsDYSF;binaryMutationsTLN2;binaryMutationsFAM194A	-0.173205	2.4	monocyte activation,negative regulation of protein polyubiquitination,plasma membrane repair,negative regulation of voltage-gated calcium channel activity,regulation of high voltage-gated calcium channel activity,macrophage activation involved in immune response,glycerol metabolic process,negative regulation of phagocytosis,alditol metabolic process,positive regulation of neutrophil chemotaxis,re…
Flavopiridol	LogisticReg	mRNALevels;proteinLevels;binaryMutations;Phosphosite	proteinLevelsNBAS;proteinLevelsCC2D1B;PhosphositeN4BP1-T242t;PhosphositeSTMN1-S25s;PhosphositeTMPO-T160t;PhosphositeRAB27A-S206s;PhosphositeMARK2-T467t;PhosphositeXPO6-T210tS211s;PhosphositeCDC42EP3-S144s;PhosphositeRPS6KA4-S721s;PhosphositeRPS27A-S20s;PhosphositeBAP1-Y401y;PhosphositeTEX2-T225t	-0.177956	29.6
Selinexor	LASSO	proteinLevels;Phosphosite	proteinLevelsMPI;proteinLevelsFBXL12;proteinLevelsBCAP29;proteinLevelsNCKIPSD;PhosphositeMAPK3-Y204y;PhosphositeAHNAK-S5749sS5752s;PhosphositeEPS15L1-S362s;PhosphositeLATS1-S464s;PhosphositeSTRN-S227s;PhosphositeEFR3A-S222s;PhosphositePPIP5K1-S987s;PhosphositeZC3H7A-S738s;PhosphositeVCPIP1-S1132s;PhosphositeCHAMP1-S145s	-0.18	3
Entrectinib	LASSO	proteinLevels;Phosphosite	proteinLevelsMGST3;proteinLevelsGK;proteinLevelsACBD3;PhosphositeMCM3-T713t;PhosphositeFXR1-S409sT411t;PhosphositeC2CD5-S304sS305s;PhosphositeDOCK8-S451sS459s;PhosphositeTRIM11-S85s;PhosphositeNCOA2-S266sT272t;PhosphositeODF2-S814sS826s;PhosphositeCEP131-T383t	-0.18	8.2
Panobinostat	ElasticNet	proteinLevels;Phosphosite	proteinLevelsGSR;proteinLevelsNFIC;proteinLevelsBCR;proteinLevelsPRKACA;proteinLevelsCD9;proteinLevelsTPP2;proteinLevelsMLH1;proteinLevelsTHOP1;proteinLevelsADK;proteinLevelsRPS23;proteinLevelsRPS28;proteinLevelsSORD;proteinLevelsPTPN12;proteinLevelsRPL18;proteinLevelsCAMK1;proteinLevelsDIP2A;proteinLevelsELOC;proteinLevelsTRIP10;proteinLevelsZNF318;proteinLevelsTTC19;proteinLevelsRAVER1;proteinL…	-0.181429	12.8
Selinexor	ElasticNet	mRNALevels	mRNALevelsPGP;mRNALevelsCHEK1;mRNALevelsHGS;mRNALevelsBIRC5;mRNALevelsTK1;mRNALevelsPCNA;mRNALevelsCCNA2;mRNALevelsRRM2;mRNALevelsMKI67;mRNALevelsRAP2B;mRNALevelsORC1;mRNALevelsNCAPH;mRNALevelsCENPW;mRNALevelsTOR2A;mRNALevelsCRELD2;mRNALevelsNCAPG2;mRNALevelsADSSL1;mRNALevelsSPC24;mRNALevelsPHIP;mRNALevelsZNF592;mRNALevelsNRGN;mRNALevelsKIFC1;mRNALevelsNUF2;mRNALevelsPDS5B;mRNALevelsSAE1;mRNALeve…	-0.190861	2.8	mitotic nuclear division,organelle fission,nuclear division,chromosome segregation,mitotic sister chromatid segregation,spindle organization,sister chromatid segregation,nuclear chromosome segregation,spindle assembly,regulation of transcription involved in G1/S transition of mitotic cell cycle,DNA replication,microtubule cytoskeleton organization involved in mitosis,cell cycle G1/S phase transit…
Trametinib (GSK1120212)	LASSO	proteinLevels;Phosphosite	proteinLevelsSTX16;proteinLevelsBCL2;proteinLevelsCASP2;proteinLevelsMVK;proteinLevelsTTC37;proteinLevelsAPTX;proteinLevelsSPART;proteinLevelsSTOML3;proteinLevelsFAM192A;proteinLevelsIFI27L2;PhosphositePDCD5-S51s;PhosphositeSGTA-S301sS307s;PhosphositeCCNT2-S480s;PhosphositeLMNB1-T20tT25t;PhosphositePOLR2A-S1899s;PhosphositeARFIP1-S132s;PhosphositeSUB1-S17s;PhosphositeZFP36L1-S54s;PhosphositeAAK1-…	-0.195923	30.4
Venetoclax	LASSO	Phosphosite	PhosphositeNADK-S46s;PhosphositeGAPDH-S210s;PhosphositeTP53BP1-S1635s;PhosphositeTCOF1-S1350s;PhosphositeBCL7A-S113sS114s;PhosphositePPA2-S317s;PhosphositeIL1RAP-S556sS557s;PhosphositeCLASP2-S774s;PhosphositeRUNX1-T14t;PhosphositeCCNY-S83s;PhosphositeSMAP2-S225s;PhosphositeKIAA0930-T355t;PhosphositeRB1-T502t	-0.197143	19.2
Trametinib (GSK1120212)	LogisticReg	proteinLevels;Phosphosite	proteinLevelsSKIV2L;proteinLevelsPPP1R10;proteinLevelsCOPS3;PhosphositeGMIP-S907s;PhosphositeF11R-S284sS287s;PhosphositeFAM208A-S342sT347t	-0.197715	30.4
Entrectinib	LASSO	mRNALevels;proteinLevels;binaryMutations;Phosphosite	proteinLevelsMGST3;proteinLevelsGK;proteinLevelsACBD3;PhosphositeMCM3-T713t;PhosphositeFXR1-S409sT411t;PhosphositeC2CD5-S304sS305s;PhosphositeDOCK8-S451sS459s;PhosphositeTRIM11-S85s;PhosphositeNCOA2-S266sT272t;PhosphositeODF2-S814sS826s;PhosphositeCEP131-T383t	-0.2	8.2
17-AAG (Tanespimycin)	ElasticNet	mRNALevels	mRNALevelsUBL4A;mRNALevelsMAP2K3;mRNALevelsJADE1;mRNALevelsTFAP2E;mRNALevelsC4BPB;mRNALevelsRPS26P11;mRNALevelsAC093415.2;mRNALevelsRP4-584D14.7	-0.206159	13
GDC-0941	LASSO	Phosphosite	PhosphositeLYL1-S260s;PhosphositePAK2-S141s;PhosphositeVIRMA-S1579s;PhosphositeANKS1A-S661s;PhosphositeHSH2D-S298s;PhosphositeDNMT3B-S835s;PhosphositeIBTK-S1045s;PhosphositeC14orf93-S224s	-0.208458	28.8
Quizartinib (AC220)	LASSO	Phosphosite	PhosphositeTP53I11-S14s;PhosphositeMAP1A-S1218s;PhosphositeSH2D3C-S440s;PhosphositePDLIM2-S134sS137s;PhosphositeUIMC1-S653s	-0.209437	23
JQ1	ElasticNet	proteinLevels;Phosphosite	proteinLevelsIFRD1;proteinLevelsFOXO3;proteinLevelsZER1;proteinLevelsATG4C;proteinLevelsCARS2;proteinLevelsNUP50;PhosphositeZC3H13-T317tS318sS325s;PhosphositeMSL3-S400s;PhosphositeSLC4A2-S113s;PhosphositeGTF3C1-S1865s;PhosphositeBOD1L1-S2845s;PhosphositeRGCC-S91s;PhosphositeCBX8-S110s;PhosphositeJADE3-S85s;PhosphositeTBL1X-S45s;PhosphositePPP6R2-S289s;PhosphositeBRD1-S803s;PhosphositeEIF4EBP2-T36…	-0.215714	11.6
Venetoclax	ElasticNet	Phosphosite	PhosphositePGRMC1-S181s;PhosphositeMEFV-S187s;PhosphositeNADK-S46s;PhosphositeGAPDH-S210s;PhosphositeRANBP2-T799t;PhosphositeTRA2B-S264sS266s;PhosphositeMAP1A-S1776s;PhosphositeTP53BP1-S659sS660sS662s;PhosphositeTP53BP1-S1635s;PhosphositeTCOF1-S1350s;PhosphositeCAMK2D-T287t;PhosphositeBCL7A-S113sS114s;PhosphositeZNF318-S2189sS2192s;PhosphositeWASHC2A-S288s;PhosphositeSMARCC2-S304sS306s;Phosphosit…	-0.21619	19.2
Selinexor	ElasticNet	Phosphosite	PhosphositeHLA-C-S359sS363s;PhosphositeMAPK3-Y204y;PhosphositeAHNAK-S5749sS5752s;PhosphositeRPS6KA1-T225t;PhosphositeNOM1-S317sS320sS321s;PhosphositeLATS1-S464s;PhosphositeSTRN-S227s;PhosphositePLCB3-T501tS515s;PhosphositeAHNAK-T5794t;PhosphositePPIP5K1-S987s;PhosphositeZC3H7A-S738s;PhosphositeOSTM1-S322s	-0.22	9.4
JNJ-28312141	ElasticNet	Phosphosite	PhosphositeAGPS-S65s;PhosphositeAP3D1-S658s;PhosphositeSRGAP2-S206s;PhosphositeMED24-S873s;PhosphositeTALDO1-T241t;PhosphositeMRE11-S688sS689s;PhosphositeAGFG1-S293s;PhosphositeSEC61B-S17s;PhosphositeTRA2B-S264sY268y;PhosphositeTRA2B-S83sY87y;PhosphositeARHGAP4-S906s;PhosphositeKMT2A-S1056sS1059s;PhosphositeKMT2A-T337t;PhosphositeSOS2-S1315s;PhosphositeDDX10-S7s;PhosphositeMDC1-S453s;PhosphositeA…	-0.224156	25.6
Flavopiridol	LogisticReg	proteinLevels;Phosphosite	proteinLevelsNBAS;proteinLevelsCC2D1B;PhosphositeN4BP1-T242t;PhosphositeSTMN1-S25s;PhosphositeTMPO-T160t;PhosphositeRAB27A-S206s;PhosphositeMARK2-T467t;PhosphositeXPO6-T210tS211s;PhosphositeCDC42EP3-S144s;PhosphositeRPS6KA4-S721s;PhosphositeRPS27A-S20s;PhosphositeBAP1-Y401y;PhosphositeTEX2-T225t	-0.232777	29.6
Trametinib (GSK1120212)	ElasticNet	proteinLevels	proteinLevelsSTX16;proteinLevelsSIVA1;proteinLevelsDAPK3;proteinLevelsCD44;proteinLevelsPCMT1;proteinLevelsCASP2;proteinLevelsRPS11;proteinLevelsMVK;proteinLevelsMOGS;proteinLevelsSKIV2L;proteinLevelsC2orf76;proteinLevelsGCSAML;proteinLevelsZNF660;proteinLevelsTTC37;proteinLevelsSPART;proteinLevelsVPS8;proteinLevelsARFGAP2;proteinLevelsGDPD1;proteinLevelsRNF149;proteinLevelsPLBD2;proteinLevelsSTO…	-0.235758	25.2
Venetoclax	ElasticNet	proteinLevels	proteinLevelsSDCBP;proteinLevelsDPYSL4;proteinLevelsMTSS1;proteinLevelsLYRM1;proteinLevelsKIF1B;proteinLevelsFLNB;proteinLevelsSUPT7L;proteinLevelsGSR;proteinLevelsCRP;proteinLevelsCSTB;proteinLevelsLYN;proteinLevelsPFKM;proteinLevelsC4A;proteinLevelsC4B;proteinLevelsPOTEI;proteinLevelsRRAS;proteinLevelsSLC2A3;proteinLevelsBCKDHA;proteinLevelsLYL1;proteinLevelsPLA2G2A;proteinLevelsEZR;proteinLeve…	-0.236667	19.2	regulation of endopeptidase activity,regulation of peptidase activity
GDC-0941	ElasticNet	binaryMutations	binaryMutationsCHD2;binaryMutationsKMT2D;binaryMutationsNKRF;binaryMutationsURB1;binaryMutationsAQR;binaryMutationsUSO1;binaryMutationsEED;binaryMutationsSF3B1;binaryMutationsTRIO;binaryMutationsSLU7;binaryMutationsBAG3;binaryMutationsNRAS;binaryMutationsKRAS;binaryMutationsITGB5;binaryMutationsGATA2;binaryMutationsMYH11;binaryMutationsZNF76;binaryMutationsMTOR;binaryMutationsMAP1B;binaryMutation…	-0.239898	24	regulation of axonogenesis,developmental cell growth,axon extension,axonogenesis,synapse assembly,spinal cord development,retina layer formation,regulation of cell morphogenesis involved in differentiation,cardiac muscle cell development,homophilic cell adhesion via plasma membrane adhesion molecules,neuron projection extension,cardiac cell development,regulation of glycogen biosynthetic process,…
Staurosporine	ElasticNet	Phosphosite	PhosphositeCD44-S697s;PhosphositeCD44-S216s;PhosphositeVCL-S721s;PhosphositeKIF21A-S855s;PhosphositeC2CD5-S304sS305s;PhosphositeSLC25A46-S37sT45t;PhosphositePASK-S116s;PhosphositePAXX-S152s;PhosphositeSLK-S818s;PhosphositeSRRM2-S1497sS1499s;PhosphositePIEZO1-S1646s	-0.24	6.6
17-AAG (Tanespimycin)	LASSO	Phosphosite	PhosphositeMICALL1-S471s;PhosphositeNCOA7-S505s;PhosphositeINPP5D-S960sT963t;PhosphositeEIF4ENIF1-S951s;PhosphositeRNF168-S134s;PhosphositeINPP5D-S960s;PhosphositeTCF20-S559sT582tS583s;PhosphositePLEC-S2039s	-0.247552	30.4
Entrectinib	ElasticNet	binaryMutations	binaryMutationsIDH1;binaryMutationsKIF20B;binaryMutationsBAG3	-0.251558	6.6	positive regulation of intracellular protein transport,positive regulation of intracellular transport,regulation of intracellular protein transport,positive regulation of cellular protein localization,positive regulation of protein transport,regulation of intracellular transport,microtubule-based movement,positive regulation of establishment of protein localization,glyoxylate metabolic process,pr…
Cabozantinib	LogisticReg	Phosphosite	PhosphositeEIF4B-S497sS498s;PhosphositeHIRA-S549s;PhosphositeXPC-S515s;PhosphositeSRCAP-S2790s;PhosphositeMMTAG2-S216sS217sS220s;PhosphositeNRDC-S94sS96s;PhosphositeRTF1-Y703y;PhosphositeACIN1-S208sS210sS216s	-0.256099	22.4
Trametinib (GSK1120212)	ElasticNet	proteinLevels;Phosphosite	proteinLevelsSTX16;proteinLevelsBCL2;proteinLevelsPRSS3;proteinLevelsCASP2;proteinLevelsMVK;proteinLevelsTTC37;proteinLevelsAPTX;proteinLevelsSMC5;proteinLevelsSPART;proteinLevelsRNF149;proteinLevelsSTOML3;proteinLevelsKCTD12;proteinLevelsFAM192A;proteinLevelsC9orf85;proteinLevelsIFI27L2;PhosphositePDCD5-S51s;PhosphositeSGTA-S301sS307s;PhosphositeCCNT2-S480s;PhosphositeH2AFY-S170s;PhosphositeARFI…	-0.25676	30.4
JQ1	ElasticNet	Phosphosite	PhosphositeZC3H13-T317tS318sS325s;PhosphositeMSL3-S400s;PhosphositeSLC4A2-S113s;PhosphositePAPOLA-S24s;PhosphositeGTF3C1-S1865s;PhosphositeBOD1L1-S2845s;PhosphositeRGCC-S91s;PhosphositeCBX8-S110s;PhosphositeJADE3-S85s;PhosphositeTBL1X-S45s;PhosphositePPP6R2-S289s;PhosphositeBRD1-S803s;PhosphositeEIF4EBP2-T36tT41t;PhosphositeAPTX-T150t;PhosphositeKANSL3-S536s;PhosphositeMAP3K4-S503s;PhosphositeZNF…	-0.258571	16
A-674563	LogisticReg	binaryMutations	binaryMutationsSART1;binaryMutationsAQR;binaryMutationsH6PD;binaryMutationsSEC24A;binaryMutationsSLC4A2;binaryMutationsNPM1	-0.272166	19.8
JNJ-28312141	LASSO	Phosphosite	PhosphositeMED24-S873s;PhosphositePSIP1-S118s;PhosphositeLMNA-T409tS414s;PhosphositeLCK-Y394y;PhosphositePGAM1-S14s;PhosphositeGTF2I-T558t;PhosphositeKMT2A-T337t;PhosphositeMDC1-S453s;PhosphositeARHGEF6-S124s;PhosphositeCCSAP-S240s;PhosphositeCIC-T2304tS2315s;PhosphositeWAC-S525s;PhosphositeLAT2-S86s;PhosphositeDCP1A-S523sS525s;PhosphositeAPPL1-S401s;PhosphositeMATR3-S759s;PhosphositePRRC2C-S633s…	-0.277965	25.6
JNJ-28312141	LogisticReg	binaryMutations	binaryMutationsDYSF;binaryMutationsSLU7;binaryMutationsBAG3;binaryMutationsMTOR;binaryMutationsRAD51AP1;binaryMutationsKIF20B;binaryMutationsNFATC4;binaryMutationsPROC;binaryMutationsAZI1;binaryMutationsADHFE1;binaryMutationsITGAD;binaryMutationsFREM1;binaryMutationsE2F7	-0.29277	21.6	cellular response to abiotic stimulus,cellular response to environmental stimulus,cellular response to heat,response to heat,long-term memory,positive regulation of intracellular protein transport,muscle cell development,calcineurin-NFAT signaling cascade,positive regulation of intracellular transport,calcineurin-mediated signaling,response to temperature stimulus,cell cycle arrest,protein locali…
JQ1	ElasticNet	mRNALevels;proteinLevels;binaryMutations;Phosphosite	proteinLevelsIFRD1;proteinLevelsFOXO3;proteinLevelsZER1;proteinLevelsATG4C;proteinLevelsCARS2;proteinLevelsNUP50;PhosphositeZC3H13-T317tS318sS325s;PhosphositeMSL3-S400s;PhosphositeSLC4A2-S113s;PhosphositeGTF3C1-S1865s;PhosphositeBOD1L1-S2845s;PhosphositeRGCC-S91s;PhosphositeCBX8-S110s;PhosphositeJADE3-S85s;PhosphositeTBL1X-S45s;PhosphositePPP6R2-S289s;PhosphositeBRD1-S803s;PhosphositeEIF4EBP2-T36…	-0.3	11.6
Foretinib (XL880)	ElasticNet	Phosphosite	PhosphositeCNOT1-T1053t;PhosphositeHIDE1-S213s;PhosphositeEEF2K-T348t;PhosphositeKMT2D-S2726s;PhosphositePDCD5-S51s;PhosphositePPP1R12A-S422s;PhosphositeMTSS1-S272s;PhosphositePPIP5K2-S1155s;PhosphositeHTATSF1-S445sS453s;PhosphositeDKC1-S21s;PhosphositeTSC22D2-S598s;PhosphositeGIGYF1-S366sS370s;PhosphositeMED24-S873s;PhosphositePSIP1-S118s;PhosphositeNSD2-S408s;PhosphositeEPRS-S1000s;PhosphositeC…	-0.300746	29.6
INK-128	LogisticReg	proteinLevels;Phosphosite	proteinLevelsFLNB;proteinLevelsANO6;proteinLevelsHDAC2;proteinLevelsMTMR12;PhosphositeEIF4EBP2-T36tT46t;PhosphositeZC3H13-S1191s;PhosphositeLYST-S2105s;PhosphositeRCOR3-T376t;PhosphositeKALRN-S1799s;PhosphositeMGA-S1422s;PhosphositeRCOR3-S372sS375sT376t;PhosphositeSON-S2009s;PhosphositeTUBA1B-T223t;PhosphositeTUBA4A-T223t;PhosphositeSQSTM1-S152s;PhosphositeLYST-S2167s	-0.307987	30.4
INK-128	LogisticReg	Phosphosite	PhosphositeDDX10-S831s;PhosphositeEIF4EBP2-T36tT46t;PhosphositeZC3H13-S1191s;PhosphositeLYST-S2105s;PhosphositeRCOR3-T376t;PhosphositeKALRN-S1799s;PhosphositeAHNAK-S5746sS5749s;PhosphositeMGA-S1422s;PhosphositeRCOR3-S372sS375sT376t;PhosphositeLYL1-S134s;PhosphositeSON-S2009s;PhosphositeTUBA1B-T223t;PhosphositeSQSTM1-S152s;PhosphositeLYST-S2167s;PhosphositeTUBA1C-T223t;PhosphositeTUBA8-T223t	-0.311431	30.4
INK-128	LogisticReg	mRNALevels;proteinLevels;binaryMutations;Phosphosite	mRNALevelsMADCAM1;mRNALevelsCABP5;proteinLevelsFLNB;proteinLevelsANO6;proteinLevelsHDAC2;PhosphositeEIF4EBP2-T36tT46t;PhosphositeZC3H13-S1191s;PhosphositeLYST-S2105s;PhosphositeRCOR3-T376t;PhosphositeMGA-S1422s;PhosphositeRCOR3-S372sS375sT376t;PhosphositeSON-S2009s;PhosphositeTUBA1B-T223t;PhosphositeTUBA4A-T223t;PhosphositeSQSTM1-S152s;PhosphositeLYST-S2167s	-0.326478	30.4
INK-128	LogisticReg	mRNALevels	mRNALevelsCYTIP;mRNALevelsMTPN;mRNALevelsCCSAP;mRNALevelsARNTL;mRNALevelsCD72;mRNALevelsGCOM2;mRNALevelsRP5-884M6.1	-0.335244	20
Ponatinib (AP24534)	ElasticNet	Phosphosite	PhosphositeC2CD2L-S613sS619s;PhosphositeAP3D1-S658s;PhosphositeARHGAP6-S330sT337t;PhosphositeHNRNPR-S23s;PhosphositeZFC3H1-S1046s;PhosphositeDIAPH1-T1256t;PhosphositeDDX5-S520s;PhosphositeDNMT1-S143s;PhosphositePML-S518s;PhosphositePML-S408sT409t;PhosphositePML-S504sS505s;PhosphositeMAP2K2-T394t;PhosphositeZEB1-S642sS646s;PhosphositeSTAT3-Y705y;PhosphositeMKI67-T2502t;PhosphositeRPL37A-S40s;Phosp…	-0.36697	27.2
Panobinostat	LASSO	Phosphosite	PhosphositeEIF4G1-T1073t;PhosphositeAHNAK-S5830s;PhosphositePLEC-S4386sS4389s;PhosphositeCHD7-S2956s;PhosphositeSLC30A1-S173s;PhosphositeMAP3K4-S499s;PhosphositeFCER1G-T70t;PhosphositePRKAR1B-S75sT85t;PhosphositeSUB1-S13sS15sS19s;PhosphositePTPN12-T519t;PhosphositeCDK13-S325s;PhosphositePFKFB3-T463tS467s;PhosphositeBOD1L1-T2797tT2805t;PhosphositeNSD1-S2471s;PhosphositeTMEM245-S16s	-0.38	12.8
BEZ235	LogisticReg	proteinLevels;Phosphosite	PhosphositeGYS1-S653s;PhosphositeTOP2B-T1349tS1358s;PhosphositeTEX2-S362s;PhosphositePHF3-S677sS680sS682s	-0.395285	24.4
BEZ235	LogisticReg	Phosphosite	PhosphositeGYS1-S653s;PhosphositeTOP2B-T1349tS1358s;PhosphositeTEX2-S362s;PhosphositePHF3-S677sS680sS682s	-0.395285	24.4
Trametinib (GSK1120212)	LogisticReg	Phosphosite	PhosphositeGMIP-S907s;PhosphositeF11R-S284sS287s;PhosphositeFAM208A-S342sT347t	-0.399197	30.4
Selinexor	LogisticReg	proteinLevels	proteinLevelsDOCK1;proteinLevelsCPTP;proteinLevelsFBXL12;proteinLevelsCORO1C	-0.433013	12.2	regulation of substrate adhesion-dependent cell spreading,substrate adhesion-dependent cell spreading,regulation of cell-substrate adhesion,regulation of epithelial cell migration,regulation of cell morphogenesis involved in differentiation,cell-substrate adhesion,epithelial cell migration,epithelium migration,tissue migration,regulation of lamellipodium morphogenesis,phagocytosis,positive regula…
Selumetinib (AZD6244)	ElasticNet	Phosphosite	PhosphositeMYL12B-T19t;PhosphositeMYL12B-S20s;PhosphositeMEFV-S187s;PhosphositeSIPA1L1-S1549s;PhosphositeSIPA1L1-S208s;PhosphositeMTSS1-S272s;PhosphositeMTSS1-T603t;PhosphositeDIAPH1-S1254s;PhosphositeNADK-S46s;PhosphositeNADK-S64s;PhosphositeLYN-S11sS13s;PhosphositeHCK-T36t;PhosphositeHCK-S38s;PhosphositePOU2F2-S55s;PhosphositeSLC2A3-S485s;PhosphositeIFNGR1-T298t;PhosphositeTCF3-S328s;Phosphosit…	-0.458156	23.8
JNJ-28312141	ElasticNet	mRNALevels;proteinLevels;binaryMutations;Phosphosite	mRNALevelsRP5-1142A6.2;mRNALevelsRP11-599J14.2;proteinLevelsEBAG9;proteinLevelsGK;proteinLevelsEHHADH;proteinLevelsAKT1S1;proteinLevelsC16orf74;proteinLevelsNUDCD1;proteinLevelsDPH7;proteinLevelsDENND2D;proteinLevelsPA2G4;proteinLevelsSLC35F6;proteinLevelsTNS1;PhosphositeAGPS-S65s;PhosphositeSRGAP2-S206s;PhosphositeMED24-S873s;PhosphositeAGFG1-S293s;PhosphositeSEC61B-S17s;PhosphositeKMT2A-S1056sS…	-0.535238	21.4
Foretinib (XL880)	LogisticReg	mRNALevels;proteinLevels;binaryMutations;Phosphosite	mRNALevelsDPEP1;mRNALevelsTRIM15;proteinLevelsCLIC2;proteinLevelsTHOP1;proteinLevelsPSMD5;proteinLevelsINPP5D;PhosphositeDNMT1-S143s;PhosphositeLRBA-S1133sS1135s;PhosphositeIL1RAP-S556sS557s;PhosphositeAFDN-S1779s;PhosphositeCEP192-S1349s;PhosphositeSRRM2-T348tS351sS353s;PhosphositePATL1-T194t;PhosphositeSPEN-S2359s;PhosphositeIVNS1ABP-S277s;PhosphositeNKTR-S243s;PhosphositeNKTR-S244s;Phosphosite…	-0.57104	29.6
Selumetinib (AZD6244)	LASSO	Phosphosite	PhosphositeMYL12B-T19t;PhosphositeMYL12B-S20s;PhosphositeLYN-S11sS13s;PhosphositePOU2F2-S55s;PhosphositeEVI2B-S268sS271s;PhosphositePAK2-S141s;PhosphositeLGALSL-S25s;PhosphositeRAB11FIP1-S435s;PhosphositeC18orf25-S356s;PhosphositeTCF12-S329s;PhosphositeSAMHD1-S616s;PhosphositeCSF3R-S758sS761s;PhosphositePTAFR-S310sS314s;PhosphositeDNTTIP2-S120sS121s	-0.601275	28.8
INK-128	ElasticNet	Phosphosite	PhosphositeHNRNPA2B1-S318s;PhosphositeDDX10-S831s;PhosphositeSRSF6-S45s;PhosphositeEIF4EBP2-T36tT46t;PhosphositeMAP7D1-S113sS116s;PhosphositeINPP5D-S960sT963t;PhosphositeBCL3-S41s;PhosphositeRAB25-S79s;PhosphositeTRPS1-S178s;PhosphositeZNF787-S46s;PhosphositePLEC-S2039s	-0.609394	25.2
Sorafenib	LogisticReg	proteinLevels;Phosphosite	proteinLevelsGRK2;proteinLevelsINPP5D;PhosphositeMAP1A-S1326s;PhosphositeNFIX-S265s	-1	29.6
Sorafenib	LogisticReg	Phosphosite	PhosphositeMAP1A-S1326s;PhosphositeNFIX-S265s;PhosphositeRMDN3-S46sS50s	-1	29.6
JNJ-28312141	LogisticReg	proteinLevels;Phosphosite	NA	0.580948	25.6	NA
JQ1	LogisticReg	mRNALevels;proteinLevels;binaryMutations;Phosphosite	NA	0.5	16	NA
PP242	LASSO	binaryMutations	NA	0.423319	24.8	NA
JQ1	LASSO	proteinLevels	NA	0.4	8.8	NA
Quizartinib (AC220)	LogisticReg	binaryMutations	NA	0.385855	24	NA
GDC-0941	LASSO	mRNALevels	NA	0.383735	18.4	NA
GDC-0941	LogisticReg	proteinLevels	NA	0.353553	24	NA
JNJ-28312141	LogisticReg	mRNALevels;proteinLevels;binaryMutations;Phosphosite	NA	0.322749	25.6	NA
Gilteritinib (ASP-2215)	LASSO	mRNALevels	NA	0.307369	3	NA
Sorafenib	LASSO	Phosphosite	NA	0.296667	12.6	NA
GDC-0941	LogisticReg	mRNALevels;proteinLevels;binaryMutations;Phosphosite	NA	0.286039	24	NA
Gilteritinib (ASP-2215)	ElasticNet	mRNALevels	NA	0.276454	5.4	NA
Elesclomol	ElasticNet	Phosphosite	NA	0.273939	21.2	NA
Selinexor	LogisticReg	Phosphosite	NA	0.25	12.2	NA
Selumetinib (AZD6244)	LogisticReg	mRNALevels;proteinLevels;binaryMutations;Phosphosite	NA	0.25	23.4	NA
Elesclomol	LASSO	proteinLevels;Phosphosite	NA	0.24	11	NA
Flavopiridol	LASSO	proteinLevels	NA	0.223333	24.6	NA
BEZ235	LASSO	proteinLevels	NA	0.215758	12.4	NA
Elesclomol	LASSO	proteinLevels	NA	0.19	11	NA
Dovitinib (CHIR-258)	LogisticReg	binaryMutations	NA	0.186989	18.8	NA
Venetoclax	LogisticReg	mRNALevels	NA	0.144338	8.6	NA
BEZ235	ElasticNet	proteinLevels	NA	0.142424	18	NA
Elesclomol	LASSO	Phosphosite	NA	0.130606	9.2	NA
JNJ-28312141	LogisticReg	proteinLevels	NA	0.129099	25.6	NA
SNS-032 (BMS-387032)	LASSO	mRNALevels	NA	0.116426	8.2	NA
JQ1	LASSO	Phosphosite	NA	0.114286	7.8	NA
Foretinib (XL880)	LogisticReg	binaryMutations	NA	0.108607	24.8	NA
Entrectinib	LASSO	binaryMutations	NA	0.105261	6.6	NA
Entrectinib	ElasticNet	mRNALevels	NA	0.0932051	4.8	NA
Foretinib (XL880)	LASSO	mRNALevels	NA	0.0787879	3	NA
JQ1	LASSO	proteinLevels;Phosphosite	NA	0.0785714	3.4	NA
Gilteritinib (ASP-2215)	ElasticNet	mRNALevels;proteinLevels;binaryMutations;Phosphosite	NA	0.06	6	NA
Panobinostat	LASSO	mRNALevels;proteinLevels;binaryMutations;Phosphosite	NA	0.0585714	12.8	NA
JQ1	LASSO	binaryMutations	NA	0.0545545	12.4	NA
Dovitinib (CHIR-258)	LogisticReg	mRNALevels	NA	0.0270281	14.4	NA
INK-128	LASSO	binaryMutations	NA	0.0205196	5.4	NA
Flavopiridol	LASSO	mRNALevels	NA	0.02	3.2	NA
Gilteritinib (ASP-2215)	LASSO	proteinLevels	NA	0.02	3	NA
PI-103	LASSO	mRNALevels	NA	0.00841462	16.8	NA
Cabozantinib	LASSO	mRNALevels	NA	0.000355324	7.8	NA
17-AAG (Tanespimycin)	LogisticReg	binaryMutations	NA	0	15.8	NA
BEZ235	LogisticReg	binaryMutations	NA	0	19.8	NA
Elesclomol	LogisticReg	binaryMutations	NA	0	18.6	NA
Entrectinib	LogisticReg	binaryMutations	NA	0	0	NA
GDC-0941	LogisticReg	binaryMutations	NA	0	10	NA
Gilteritinib (ASP-2215)	LogisticReg	binaryMutations	NA	0	0	NA
PP242	LogisticReg	binaryMutations	NA	0	11.2	NA
Sorafenib	LogisticReg	binaryMutations	NA	0	20.6	NA
Staurosporine	LogisticReg	binaryMutations	NA	0	0	NA
17-AAG (Tanespimycin)	LogisticReg	mRNALevels	NA	0	0	NA
A-674563	LogisticReg	mRNALevels	NA	0	15.4	NA
BEZ235	LogisticReg	mRNALevels	NA	0	0	NA
Entrectinib	LogisticReg	mRNALevels	NA	0	0	NA
GDC-0941	LogisticReg	mRNALevels	NA	0	0	NA
Gilteritinib (ASP-2215)	LogisticReg	mRNALevels	NA	0	0	NA
JNJ-28312141	LogisticReg	mRNALevels	NA	0	15	NA
JQ1	LogisticReg	mRNALevels	NA	0	0	NA
PP242	LogisticReg	mRNALevels	NA	0	0	NA
Selumetinib (AZD6244)	LogisticReg	mRNALevels	NA	0	0	NA
Staurosporine	LogisticReg	mRNALevels	NA	0	0	NA
A-674563	LogisticReg	mRNALevels;proteinLevels;binaryMutations;Phosphosite	NA	0	23.4	NA
Entrectinib	LogisticReg	mRNALevels;proteinLevels;binaryMutations;Phosphosite	NA	0	0	NA
Gilteritinib (ASP-2215)	LogisticReg	mRNALevels;proteinLevels;binaryMutations;Phosphosite	NA	0	0	NA
Staurosporine	LogisticReg	mRNALevels;proteinLevels;binaryMutations;Phosphosite	NA	0	0	NA
Gilteritinib (ASP-2215)	LASSO	Phosphosite	NA	0	0	NA
17-AAG (Tanespimycin)	LogisticReg	Phosphosite	NA	0	25.2	NA
Elesclomol	LogisticReg	Phosphosite	NA	0	21.6	NA
Entrectinib	LogisticReg	Phosphosite	NA	0	0	NA
Gilteritinib (ASP-2215)	LogisticReg	Phosphosite	NA	0	0	NA
JQ1	LogisticReg	Phosphosite	NA	0	16	NA
Selumetinib (AZD6244)	LogisticReg	Phosphosite	NA	0	23.4	NA
Staurosporine	LogisticReg	Phosphosite	NA	0	0	NA
17-AAG (Tanespimycin)	LogisticReg	proteinLevels	NA	0	25.2	NA
Elesclomol	LogisticReg	proteinLevels	NA	0	21.6	NA
Entrectinib	LogisticReg	proteinLevels	NA	0	0	NA
Gilteritinib (ASP-2215)	LogisticReg	proteinLevels	NA	0	0	NA
JQ1	LogisticReg	proteinLevels	NA	0	16	NA
Staurosporine	LogisticReg	proteinLevels	NA	0	0	NA
17-AAG (Tanespimycin)	LogisticReg	proteinLevels;Phosphosite	NA	0	25.2	NA
Elesclomol	LogisticReg	proteinLevels;Phosphosite	NA	0	21.6	NA
Entrectinib	LogisticReg	proteinLevels;Phosphosite	NA	0	0	NA
Gilteritinib (ASP-2215)	LogisticReg	proteinLevels;Phosphosite	NA	0	0	NA
JQ1	LogisticReg	proteinLevels;Phosphosite	NA	0	16	NA
Staurosporine	LogisticReg	proteinLevels;Phosphosite	NA	0	0	NA
A-674563	LASSO	mRNALevels	NA	-0.00121293	9.8	NA
A-674563	ElasticNet	mRNALevels	NA	-0.0161422	9.8	NA
Staurosporine	ElasticNet	proteinLevels	NA	-0.02	4.8	NA
Staurosporine	LASSO	proteinLevels	NA	-0.02	4.8	NA
Gilteritinib (ASP-2215)	LASSO	mRNALevels;proteinLevels;binaryMutations;Phosphosite	NA	-0.02	3	NA
Panobinostat	LASSO	mRNALevels	NA	-0.0209749	4.6	NA
Ponatinib (AP24534)	LASSO	mRNALevels	NA	-0.0266667	2.8	NA
Foretinib (XL880)	ElasticNet	mRNALevels	NA	-0.0277701	6.6	NA
Gilteritinib (ASP-2215)	LASSO	proteinLevels;Phosphosite	NA	-0.04	3	NA
JQ1	ElasticNet	mRNALevels	NA	-0.0484917	3.6	NA
JNJ-28312141	LASSO	mRNALevels	NA	-0.0494809	6.4	NA
Venetoclax	ElasticNet	binaryMutations	NA	-0.0545545	5.6	NA
Venetoclax	LASSO	binaryMutations	NA	-0.0545545	5.6	NA
Gilteritinib (ASP-2215)	ElasticNet	proteinLevels;Phosphosite	NA	-0.06	6	NA
A-674563	LogisticReg	proteinLevels	NA	-0.065507	23.4	NA
PP242	LogisticReg	proteinLevels	NA	-0.0684653	24.6	NA
JQ1	LASSO	mRNALevels	NA	-0.0684917	1.8	NA
JQ1	LASSO	mRNALevels;proteinLevels;binaryMutations;Phosphosite	NA	-0.0714286	3.4	NA
Entrectinib	LASSO	mRNALevels	NA	-0.08	1	NA
INK-128	LASSO	mRNALevels	NA	-0.0855118	11.4	NA
Trametinib (GSK1120212)	LogisticReg	mRNALevels	NA	-0.0928477	16.8	NA
Foretinib (XL880)	LogisticReg	Phosphosite	NA	-0.106199	29.6	NA
SNS-032 (BMS-387032)	LASSO	binaryMutations	NA	-0.107206	20.6	NA
Foretinib (XL880)	LogisticReg	mRNALevels	NA	-0.113961	19.2	NA
Selinexor	LASSO	mRNALevels	NA	-0.123779	2.8	NA
Gilteritinib (ASP-2215)	ElasticNet	Phosphosite	NA	-0.126586	8.8	NA
Panobinostat	LASSO	binaryMutations	NA	-0.130931	2.2	NA
INK-128	ElasticNet	binaryMutations	NA	-0.133863	15.2	NA
BEZ235	ElasticNet	binaryMutations	NA	-0.134233	14.8	NA
BEZ235	LASSO	binaryMutations	NA	-0.134233	14.8	NA
Selinexor	LogisticReg	mRNALevels;proteinLevels;binaryMutations;Phosphosite	NA	-0.144338	12.2	NA
Selinexor	LogisticReg	proteinLevels;Phosphosite	NA	-0.144338	12.2	NA
Elesclomol	ElasticNet	binaryMutations	NA	-0.145217	12.8	NA
Ponatinib (AP24534)	ElasticNet	mRNALevels	NA	-0.154257	9.6	NA
Flavopiridol	LogisticReg	proteinLevels	NA	-0.159465	29.6	NA
PI-103	LogisticReg	mRNALevels	NA	-0.159714	16.2	NA
Panobinostat	LogisticReg	mRNALevels	NA	-0.179162	3.4	NA
Cabozantinib	LogisticReg	binaryMutations	NA	-0.179592	18.8	NA
A-674563	LogisticReg	Phosphosite	NA	-0.183897	23.4	NA
INK-128	LogisticReg	proteinLevels	NA	-0.192937	30.4	NA
Selinexor	LASSO	binaryMutations	NA	-0.2	2.4	NA
Panobinostat	LogisticReg	binaryMutations	NA	-0.204124	9.8	NA
17-AAG (Tanespimycin)	LASSO	mRNALevels	NA	-0.206159	13	NA
Selinexor	LASSO	Phosphosite	NA	-0.22	6.4	NA
Panobinostat	ElasticNet	binaryMutations	NA	-0.225714	4.4	NA
A-674563	LogisticReg	proteinLevels;Phosphosite	NA	-0.242125	23.4	NA
JNJ-28312141	ElasticNet	mRNALevels	NA	-0.258443	10.8	NA
Elesclomol	LASSO	binaryMutations	NA	-0.306186	17.6	NA
17-AAG (Tanespimycin)	LogisticReg	mRNALevels;proteinLevels;binaryMutations;Phosphosite	NA	-0.315838	25.2	NA
JNJ-28312141	LogisticReg	Phosphosite	NA	-0.322749	25.6	NA
GDC-0941	LogisticReg	Phosphosite	NA	-0.325396	24	NA
GDC-0941	LogisticReg	proteinLevels;Phosphosite	NA	-0.325396	24	NA
Staurosporine	LASSO	mRNALevels	NA	-0.36	2.8	NA
Flavopiridol	LogisticReg	binaryMutations	NA	-0.365988	24.8	NA
INK-128	ElasticNet	mRNALevels	NA	-0.368528	20	NA
SNS-032 (BMS-387032)	ElasticNet	binaryMutations	NA	-0.448439	20.6	NA
SNS-032 (BMS-387032)	LogisticReg	binaryMutations	NA	-0.57735	25.6	NA
INK-128	LogisticReg	binaryMutations	NA	NA	25.6	NA
Venetoclax	LogisticReg	binaryMutations	NA	NA	15.2	NA
Flavopiridol	LogisticReg	mRNALevels	NA	NA	19.2	NA

## Sheet: table s3
Compound	Molecular	Method	Mean Correlation
Sorafenib	mRNALevels;proteinLevels;binaryMutations;Phosphosite	LogisticReg	1
Quizartinib (AC220)	mRNALevels;proteinLevels;binaryMutations;Phosphosite	LogisticReg	0.791414
Quizartinib (AC220)	proteinLevels	LogisticReg	0.791414
Quizartinib (AC220)	proteinLevels;Phosphosite	LogisticReg	0.791414
Venetoclax	mRNALevels;proteinLevels;binaryMutations;Phosphosite	ElasticNet	0.701905
SNS-032 (BMS-387032)	mRNALevels;proteinLevels;binaryMutations;Phosphosite	LogisticReg	0.689426
A-674563	proteinLevels	ElasticNet	0.680793
Foretinib (XL880)	proteinLevels	ElasticNet	0.667855
PI-103	mRNALevels;proteinLevels;binaryMutations;Phosphosite	ElasticNet	0.629394
Selumetinib (AZD6244)	proteinLevels	ElasticNet	0.620797
Flavopiridol	mRNALevels;proteinLevels;binaryMutations;Phosphosite	ElasticNet	0.612867
JNJ-28312141	proteinLevels;Phosphosite	LogisticReg	0.580948
GDC-0941	proteinLevels;Phosphosite	LASSO	0.57665
Elesclomol	mRNALevels;proteinLevels;binaryMutations;Phosphosite	LASSO	0.572453
Cabozantinib	proteinLevels	LASSO	0.542494
17-AAG (Tanespimycin)	proteinLevels	ElasticNet	0.530746
JQ1	binaryMutations	LogisticReg	0.5
JQ1	mRNALevels;proteinLevels;binaryMutations;Phosphosite	LogisticReg	0.5
Trametinib (GSK1120212)	binaryMutations	LogisticReg	0.498881
Gilteritinib (ASP-2215)	binaryMutations	ElasticNet	0.493162
Ponatinib (AP24534)	proteinLevels	ElasticNet	0.450303
Panobinostat	mRNALevels;proteinLevels;binaryMutations;Phosphosite	ElasticNet	0.437143
PP242	binaryMutations	LASSO	0.423319
Dovitinib (CHIR-258)	proteinLevels	LogisticReg	0.410845
BEZ235	mRNALevels	ElasticNet	0.381781
Selinexor	binaryMutations	LogisticReg	0.302749
Staurosporine	mRNALevels;proteinLevels;binaryMutations;Phosphosite	LASSO	0.28
Staurosporine	proteinLevels;Phosphosite	LASSO	0.28
INK-128	proteinLevels;Phosphosite	LASSO	0.235478
Entrectinib	proteinLevels;Phosphosite	ElasticNet	0.14

## Sheet: table S4
File created with BiNGO v3.0.5 (c) on Jan 5, 2022 at 1:44:07 PM
ontology: namespace
curator: bingo
Selected ontology file : bundle://126.0:1/data/GO_Biological_Process
Selected annotation file : bundle://126.0:1/data/H_sapiens_default
Discarded evidence codes :
Overrepresentation
Selected statistical test : Hypergeometric test
Selected correction : Benjamini & Hochberg False Discovery Rate (FDR) correction
Selected significance level : 0.05
Testing option : Use whole annotation as reference set
The selected cluster :
RB1	SETD3	FLT3	SCHIP1	PHAX	AFF4	AFF1	SNAPC2	CASP3	CASP2	IKBKG	CLIC2	PCMTD1	GAMT	TBP	MKL1	TRAF2	FOS	GTF2F1	VAV1	TNFRSF1A	MYOD1	SGK1	BIRC2	HDAC4	GTF2A1	CUL5	DIABLO	SHC1	SRF	NEDD4L	XIAP	MLLT1	CBL	MLLT3	HSP90B1	SOCS2	SULT1A1	SOCS1	POLR2A	INPP5D	NACC1	RIPK1	FADD	NTRK1	UBE2I	CRADD	SIAH1	UBE2A	EPOR
No annotations were retrieved for the following entities:
SETD3	AFF1
GO-ID	p-value	corr p-value	x	n	X	N	Description	Genes in test set
48522	4.0264e-11	4.0766e-08	29	2004	57	14304	positive regulation of cellular process	RB1|HDAC4|CUL5|FLT3|DIABLO|SHC1|SRF|NEDD4L|CBL|CASP3|INPP5D|NACC1|CASP2|RIPK1|IKBKG|FADD|TBP|CRADD|TRAF2|FOS|UBE2A|VAV1|TNFRSF1A|PRKRA|MYOD1|NEDD4|FAS|BIRC2|TAF1
48518	7.2538e-11	4.0766e-08	30	2208	57	14304	positive regulation of biological process	RB1|HDAC4|CUL5|FLT3|DIABLO|SHC1|SRF|NEDD4L|CBL|CASP3|INPP5D|NACC1|CASP2|RIPK1|IKBKG|FADD|TBP|CRADD|TRAF2|FOS|UBE2A|VAV1|TARBP2|TNFRSF1A|PRKRA|MYOD1|NEDD4|FAS|BIRC2|TAF1
50794	2.5361e-10	8.0924e-08	48	6223	57	14304	regulation of cellular process	RB1|HDAC4|GTF2A1|CUL5|FLT3|DIABLO|SHC1|SRF|NEDD4L|XIAP|MLLT1|CBL|MLLT3|AFF4|HSP90B1|SOCS2|SOCS1|POLR2A|SNAPC2|CASP3|INPP5D|NACC1|CASP2|RIPK1|IKBKG|FADD|CLIC2|NTRK1|TBP|UBE2I|CRADD|MKL1|TRAF2|FOS|UBE2A|VAV1|EPOR|TARBP2|TNFRSF1A|CDK9|PRKRA|MYOD1|NEDD4|FAS|BCOR|EBAG9|BIRC2|TAF1
42981	3.2157e-10	8.0924e-08	19	852	57	14304	regulation of apoptosis	NTRK1|CUL5|CRADD|DIABLO|XIAP|TRAF2|VAV1|HSP90B1|SOCS2|PRKRA|CASP3|INPP5D|NACC1|CASP2|FAS|RIPK1|IKBKG|FADD|BIRC2
43067	3.7667e-10	8.0924e-08	19	860	57	14304	regulation of programmed cell death	NTRK1|CUL5|CRADD|DIABLO|XIAP|TRAF2|VAV1|HSP90B1|SOCS2|PRKRA|CASP3|INPP5D|NACC1|CASP2|FAS|RIPK1|IKBKG|FADD|BIRC2
10941	4.3198e-10	8.0924e-08	19	867	57	14304	regulation of cell death	NTRK1|CUL5|CRADD|DIABLO|XIAP|TRAF2|VAV1|HSP90B1|SOCS2|PRKRA|CASP3|INPP5D|NACC1|CASP2|FAS|RIPK1|IKBKG|FADD|BIRC2
43065	1.3472e-09	2.0614e-07	14	442	57	14304	positive regulation of apoptosis	CUL5|CRADD|DIABLO|TRAF2|VAV1|PRKRA|CASP3|INPP5D|NACC1|CASP2|FAS|RIPK1|IKBKG|FADD
43068	1.4704e-09	2.0614e-07	14	445	57	14304	positive regulation of programmed cell death	CUL5|CRADD|DIABLO|TRAF2|VAV1|PRKRA|CASP3|INPP5D|NACC1|CASP2|FAS|RIPK1|IKBKG|FADD
10942	1.6506e-09	2.0614e-07	14	449	57	14304	positive regulation of cell death	CUL5|CRADD|DIABLO|TRAF2|VAV1|PRKRA|CASP3|INPP5D|NACC1|CASP2|FAS|RIPK1|IKBKG|FADD
50789	2.1327e-09	2.3972e-07	48	6553	57	14304	regulation of biological process	RB1|HDAC4|GTF2A1|CUL5|FLT3|DIABLO|SHC1|SRF|NEDD4L|XIAP|MLLT1|CBL|MLLT3|AFF4|HSP90B1|SOCS2|SOCS1|POLR2A|SNAPC2|CASP3|INPP5D|NACC1|CASP2|RIPK1|IKBKG|FADD|CLIC2|NTRK1|TBP|UBE2I|CRADD|MKL1|TRAF2|FOS|UBE2A|VAV1|EPOR|TARBP2|TNFRSF1A|CDK9|PRKRA|MYOD1|NEDD4|FAS|BCOR|EBAG9|BIRC2|TAF1
6917	3.0759e-09	2.986e-07	12	315	57	14304	induction of apoptosis	CUL5|CRADD|DIABLO|PRKRA|CASP3|NACC1|CASP2|FAS|RIPK1|IKBKG|FADD|VAV1
12502	3.1879e-09	2.986e-07	12	316	57	14304	induction of programmed cell death	CUL5|CRADD|DIABLO|PRKRA|CASP3|NACC1|CASP2|FAS|RIPK1|IKBKG|FADD|VAV1
65007	2.2013e-08	1.9033e-06	48	6942	57	14304	biological regulation	RB1|HDAC4|GTF2A1|CUL5|FLT3|DIABLO|SHC1|SRF|NEDD4L|XIAP|MLLT1|CBL|MLLT3|AFF4|HSP90B1|SOCS2|SOCS1|POLR2A|SNAPC2|CASP3|INPP5D|NACC1|CASP2|RIPK1|IKBKG|FADD|CLIC2|NTRK1|TBP|UBE2I|CRADD|MKL1|TRAF2|FOS|UBE2A|VAV1|EPOR|TARBP2|TNFRSF1A|CDK9|PRKRA|MYOD1|NEDD4|FAS|BCOR|EBAG9|BIRC2|TAF1
6368	3.295e-08	2.6454e-06	6	48	57	14304	RNA elongation from RNA polymerase II promoter	CDK9|GTF2A1|TBP|POLR2A|GTF2F1|TAF1
51704	4.046e-08	3.0318e-06	16	785	57	14304	multi-organism process	RB1|TBP|UBE2I|CUL5|NEDD4L|FOS|UBE2A|GTF2F1|EPOR|TNFRSF1A|SOCS1|PRKRA|NEDD4|IKBKG|FADD|TAF1
6354	4.7915e-08	3.366e-06	6	51	57	14304	RNA elongation	CDK9|GTF2A1|TBP|POLR2A|GTF2F1|TAF1
44260	7.6234e-08	5.0404e-06	33	3508	57	14304	cellular macromolecule metabolic process	HDAC4|GTF2A1|CUL5|FLT3|SHC1|NEDD4L|PHAX|MLLT1|CBL|AFF4|HSP90B1|POLR2A|SNAPC2|CASP3|RIPK1|PCMTD1|NTRK1|TBP|UBE2I|SIAH1|TRAF2|FOS|UBE2A|GTF2F1|TARBP2|CDK9|PRKRA|MYOD1|NEDD4|UBA2|SGK1|BIRC2|TAF1
43170	1.505e-07	9.3978e-06	35	4017	57	14304	macromolecule metabolic process	HDAC4|GTF2A1|CUL5|FLT3|SHC1|NEDD4L|PHAX|MLLT1|CBL|AFF4|HSP90B1|POLR2A|SNAPC2|CASP3|CASP2|RIPK1|PCMTD1|NTRK1|TBP|UBE2I|CRADD|SIAH1|TRAF2|FOS|UBE2A|GTF2F1|TARBP2|CDK9|PRKRA|MYOD1|NEDD4|UBA2|SGK1|BIRC2|TAF1
43687	2.086e-07	1.1926e-05	19	1266	57	14304	post-translational protein modification	HDAC4|NTRK1|UBE2I|FLT3|SHC1|SIAH1|NEDD4L|TRAF2|UBE2A|CBL|CDK9|PRKRA|MYOD1|NEDD4|UBA2|RIPK1|SGK1|BIRC2|TAF1
8625	2.2015e-07	1.1926e-05	4	14	57	14304	induction of apoptosis via death domain receptors	CRADD|DIABLO|CASP3|FADD
8624	2.2281e-07	1.1926e-05	7	108	57	14304	induction of apoptosis by extracellular signals	CRADD|DIABLO|CASP3|CASP2|FAS|FADD|VAV1
6367	2.5282e-07	1.2512e-05	6	67	57	14304	transcription initiation from RNA polymerase II promoter	CDK9|GTF2A1|TBP|POLR2A|GTF2F1|TAF1
6915	2.5602e-07	1.2512e-05	13	567	57	14304	apoptosis	DIABLO|SIAH1|XIAP|TRAF2|VAV1|TNFRSF1A|CASP3|CASP2|FAS|RIPK1|FADD|SGK1|EBAG9
65003	2.8198e-07	1.3183e-05	14	676	57	14304	macromolecular complex assembly	GTF2A1|TBP|PHAX|TRAF2|GTF2F1|TARBP2|TNFRSF1A|CDK9|POLR2A|NACC1|FAS|FADD|BIRC2|TAF1
6366	2.9322e-07	1.3183e-05	9	231	57	14304	transcription from RNA polymerase II promoter	CDK9|GTF2A1|TBP|POLR2A|SNAPC2|MLLT1|GTF2F1|AFF4|TAF1
12501	3.1279e-07	1.3308e-05	13	577	57	14304	programmed cell death	DIABLO|SIAH1|XIAP|TRAF2|VAV1|TNFRSF1A|CASP3|CASP2|FAS|RIPK1|FADD|SGK1|EBAG9
19222	3.1967e-07	1.3308e-05	34	3919	57	14304	regulation of metabolic process	RB1|HDAC4|GTF2A1|SHC1|SRF|NEDD4L|MLLT1|MLLT3|AFF4|HSP90B1|SOCS1|POLR2A|SNAPC2|CASP3|INPP5D|NACC1|RIPK1|IKBKG|NTRK1|TBP|UBE2I|MKL1|TRAF2|FOS|UBE2A|VAV1|TARBP2|TNFRSF1A|CDK9|PRKRA|MYOD1|NEDD4|BCOR|TAF1
43412	3.9356e-07	1.5799e-05	21	1607	57	14304	macromolecule modification	HDAC4|NTRK1|UBE2I|FLT3|SHC1|SIAH1|NEDD4L|TRAF2|FOS|UBE2A|CBL|CDK9|PRKRA|MYOD1|NEDD4|UBA2|RIPK1|SGK1|BIRC2|PCMTD1|TAF1
8219	4.1589e-07	1.6119e-05	14	698	57	14304	cell death	TBP|DIABLO|SIAH1|XIAP|TRAF2|VAV1|TNFRSF1A|CASP3|CASP2|FAS|RIPK1|FADD|SGK1|EBAG9
16265	4.5337e-07	1.6986e-05	14	703	57	14304	death	TBP|DIABLO|SIAH1|XIAP|TRAF2|VAV1|TNFRSF1A|CASP3|CASP2|FAS|RIPK1|FADD|SGK1|EBAG9
44419	5.6574e-07	1.9433e-05	10	327	57	14304	interspecies interaction between organisms	RB1|TBP|UBE2I|CUL5|NEDD4|NEDD4L|IKBKG|FADD|TNFRSF1A|TAF1
6461	5.7053e-07	1.9433e-05	12	507	57	14304	protein complex assembly	CDK9|GTF2A1|TBP|POLR2A|NACC1|FAS|TRAF2|FADD|GTF2F1|BIRC2|TNFRSF1A|TAF1
70271	5.7053e-07	1.9433e-05	12	507	57	14304	protein complex biogenesis	CDK9|GTF2A1|TBP|POLR2A|NACC1|FAS|TRAF2|FADD|GTF2F1|BIRC2|TNFRSF1A|TAF1
43933	6.4636e-07	2.1368e-05	14	724	57	14304	macromolecular complex subunit organization	GTF2A1|TBP|PHAX|TRAF2|GTF2F1|TARBP2|TNFRSF1A|CDK9|POLR2A|NACC1|FAS|FADD|BIRC2|TAF1
6464	7.9977e-07	2.5684e-05	20	1526	57	14304	protein modification process	HDAC4|NTRK1|UBE2I|FLT3|SHC1|SIAH1|NEDD4L|TRAF2|UBE2A|CBL|CDK9|PRKRA|MYOD1|NEDD4|UBA2|RIPK1|SGK1|BIRC2|PCMTD1|TAF1
6352	8.4728e-07	2.6454e-05	6	82	57	14304	transcription initiation	CDK9|GTF2A1|TBP|POLR2A|GTF2F1|TAF1
44237	9.7813e-07	2.9714e-05	38	4990	57	14304	cellular metabolic process	HDAC4|GTF2A1|CUL5|FLT3|SHC1|NEDD4L|PHAX|MLLT1|CBL|AFF4|HSP90B1|SULT1A1|POLR2A|SNAPC2|CASP3|INPP5D|RIPK1|PCMTD1|GAMT|NTRK1|TBP|UBE2I|SIAH1|TRAF2|FOS|UBE2A|GTF2F1|TARBP2|TNFRSF1A|CDK9|PRKRA|MYOD1|NEDD4|FAS|UBA2|SGK1|BIRC2|TAF1
44238	1.3732e-06	4.0619e-05	39	5288	57	14304	primary metabolic process	HDAC4|GTF2A1|CUL5|FLT3|SHC1|NEDD4L|PHAX|MLLT1|CBL|AFF4|HSP90B1|SULT1A1|POLR2A|SNAPC2|CASP3|CASP2|RIPK1|PCMTD1|GAMT|NTRK1|TBP|UBE2I|CRADD|SIAH1|TRAF2|FOS|UBE2A|GTF2F1|TARBP2|TNFRSF1A|CDK9|PRKRA|MYOD1|NEDD4|FAS|UBA2|SGK1|BIRC2|TAF1
32446	1.4571e-06	4.1996e-05	8	206	57	14304	protein modification by small protein conjugation	NEDD4|SIAH1|NEDD4L|UBA2|TRAF2|UBE2A|CBL|BIRC2
8633	1.571e-06	4.4146e-05	4	22	57	14304	activation of pro-apoptotic gene products	FAS|TRAF2|RIPK1|FADD
22607	1.8573e-06	5.0917e-05	15	913	57	14304	cellular component assembly	GTF2A1|TBP|PHAX|TRAF2|GTF2F1|TARBP2|TNFRSF1A|HSP90B1|CDK9|POLR2A|NACC1|FAS|FADD|BIRC2|TAF1
60255	1.9565e-06	5.236e-05	30	3377	57	14304	regulation of macromolecule metabolic process	RB1|HDAC4|GTF2A1|SHC1|SRF|NEDD4L|MLLT1|MLLT3|AFF4|SOCS1|POLR2A|SNAPC2|INPP5D|NACC1|RIPK1|IKBKG|TBP|UBE2I|MKL1|TRAF2|FOS|UBE2A|TARBP2|TNFRSF1A|CDK9|PRKRA|MYOD1|NEDD4|BCOR|TAF1
6351	2.0161e-06	5.2701e-05	9	291	57	14304	transcription, DNA-dependent	CDK9|GTF2A1|TBP|POLR2A|SNAPC2|MLLT1|GTF2F1|AFF4|TAF1
32774	2.2559e-06	5.7628e-05	9	295	57	14304	RNA biosynthetic process	CDK9|GTF2A1|TBP|POLR2A|SNAPC2|MLLT1|GTF2F1|AFF4|TAF1
34097	4.0508e-06	0.00010118	6	107	57	14304	response to cytokine stimulus	HDAC4|SOCS1|CASP3|SRF|RIPK1|FOS
16043	4.9599e-06	0.00012119	25	2563	57	14304	cellular component organization	RB1|HDAC4|GTF2A1|SRF|PHAX|HSP90B1|POLR2A|CASP3|NACC1|FADD|TBP|UBE2I|SIAH1|TRAF2|UBE2A|GTF2F1|VAV1|TARBP2|TNFRSF1A|CDK9|NEDD4|FAS|BCOR|BIRC2|TAF1
31323	5.2134e-06	0.00012468	31	3736	57	14304	regulation of cellular metabolic process	RB1|HDAC4|GTF2A1|SHC1|SRF|MLLT1|MLLT3|AFF4|HSP90B1|SOCS1|POLR2A|SNAPC2|CASP3|INPP5D|NACC1|RIPK1|IKBKG|NTRK1|TBP|UBE2I|MKL1|TRAF2|FOS|VAV1|TARBP2|TNFRSF1A|CDK9|MYOD1|NEDD4|BCOR|TAF1
80090	6.008e-06	0.00014069	30	3554	57	14304	regulation of primary metabolic process	RB1|HDAC4|GTF2A1|SHC1|SRF|NEDD4L|MLLT1|MLLT3|AFF4|SOCS1|POLR2A|SNAPC2|NACC1|RIPK1|IKBKG|NTRK1|TBP|UBE2I|MKL1|TRAF2|FOS|UBE2A|VAV1|TARBP2|TNFRSF1A|CDK9|MYOD1|NEDD4|BCOR|TAF1
9987	6.6483e-06	0.0001525	52	9369	57	14304	cellular process	RB1|FLT3|PHAX|AFF4|SNAPC2|CASP3|CASP2|IKBKG|CLIC2|PCMTD1|GAMT|TBP|TRAF2|FOS|GTF2F1|VAV1|TNFRSF1A|MYOD1|SGK1|BIRC2|HDAC4|GTF2A1|CUL5|DIABLO|SHC1|SRF|NEDD4L|XIAP|MLLT1|CBL|HSP90B1|SOCS2|SULT1A1|SOCS1|POLR2A|INPP5D|RIPK1|FADD|NTRK1|UBE2I|SIAH1|UBE2A|EPOR|TARBP2|CDK9|PRKRA|NEDD4|FAS|UBA2|BCOR|EBAG9|TAF1
19538	6.9873e-06	0.00015647	25	2611	57	14304	protein metabolic process	HDAC4|CUL5|FLT3|SHC1|NEDD4L|CBL|HSP90B1|CASP3|CASP2|RIPK1|PCMTD1|NTRK1|UBE2I|CRADD|SIAH1|TRAF2|UBE2A|CDK9|PRKRA|MYOD1|NEDD4|UBA2|SGK1|BIRC2|TAF1
70647	7.0996e-06	0.00015647	8	255	57	14304	protein modification by small protein conjugation or removal	NEDD4|SIAH1|NEDD4L|UBA2|TRAF2|UBE2A|CBL|BIRC2
6350	8.0682e-06	0.0001744	9	345	57	14304	transcription	CDK9|GTF2A1|TBP|POLR2A|SNAPC2|MLLT1|GTF2F1|AFF4|TAF1
19219	8.4291e-06	0.00017876	27	3014	57	14304	regulation of nucleobase, nucleoside, nucleotide and nucleic acid metabolic process	RB1|HDAC4|GTF2A1|SHC1|SRF|MLLT1|MLLT3|AFF4|POLR2A|SNAPC2|NACC1|RIPK1|IKBKG|NTRK1|TBP|UBE2I|MKL1|TRAF2|FOS|VAV1|TARBP2|TNFRSF1A|CDK9|MYOD1|NEDD4|BCOR|TAF1
44085	8.6682e-06	0.00018026	15	1035	57	14304	cellular component biogenesis	GTF2A1|TBP|PHAX|TRAF2|GTF2F1|TARBP2|TNFRSF1A|HSP90B1|CDK9|POLR2A|NACC1|FAS|FADD|BIRC2|TAF1
31326	8.8204e-06	0.00018026	27	3021	57	14304	regulation of cellular biosynthetic process	RB1|HDAC4|GTF2A1|SHC1|SRF|MLLT1|MLLT3|AFF4|POLR2A|SNAPC2|INPP5D|NACC1|RIPK1|IKBKG|NTRK1|TBP|UBE2I|MKL1|TRAF2|FOS|TARBP2|TNFRSF1A|CDK9|MYOD1|NEDD4|BCOR|TAF1
16567	9.5191e-06	0.00019106	7	189	57	14304	protein ubiquitination	NEDD4|SIAH1|NEDD4L|TRAF2|UBE2A|CBL|BIRC2
51171	9.9688e-06	0.00019658	27	3040	57	14304	regulation of nitrogen compound metabolic process	RB1|HDAC4|GTF2A1|SHC1|SRF|MLLT1|MLLT3|AFF4|POLR2A|SNAPC2|NACC1|RIPK1|IKBKG|NTRK1|TBP|UBE2I|MKL1|TRAF2|FOS|VAV1|TARBP2|TNFRSF1A|CDK9|MYOD1|NEDD4|BCOR|TAF1
9889	1.0293e-05	0.00019947	27	3045	57	14304	regulation of biosynthetic process	RB1|HDAC4|GTF2A1|SHC1|SRF|MLLT1|MLLT3|AFF4|POLR2A|SNAPC2|INPP5D|NACC1|RIPK1|IKBKG|NTRK1|TBP|UBE2I|MKL1|TRAF2|FOS|TARBP2|TNFRSF1A|CDK9|MYOD1|NEDD4|BCOR|TAF1
10556	1.1987e-05	0.00022443	26	2877	57	14304	regulation of macromolecule biosynthetic process	RB1|HDAC4|GTF2A1|SHC1|SRF|MLLT1|MLLT3|AFF4|POLR2A|SNAPC2|INPP5D|NACC1|RIPK1|IKBKG|TBP|UBE2I|MKL1|TRAF2|FOS|TARBP2|TNFRSF1A|CDK9|MYOD1|NEDD4|BCOR|TAF1
44267	1.2082e-05	0.00022443	22	2153	57	14304	cellular protein metabolic process	HDAC4|NTRK1|UBE2I|CUL5|FLT3|SHC1|SIAH1|NEDD4L|TRAF2|UBE2A|CBL|HSP90B1|CDK9|PRKRA|MYOD1|NEDD4|UBA2|RIPK1|SGK1|BIRC2|PCMTD1|TAF1
8152	1.218e-05	0.00022443	40	5959	57	14304	metabolic process	HDAC4|GTF2A1|CUL5|FLT3|SHC1|NEDD4L|PHAX|MLLT1|CBL|AFF4|HSP90B1|SULT1A1|POLR2A|SNAPC2|CASP3|INPP5D|CASP2|RIPK1|PCMTD1|GAMT|NTRK1|TBP|UBE2I|CRADD|SIAH1|TRAF2|FOS|UBE2A|GTF2F1|TARBP2|TNFRSF1A|CDK9|PRKRA|MYOD1|NEDD4|FAS|UBA2|SGK1|BIRC2|TAF1
50869	2.1169e-05	0.00038378	3	14	57	14304	negative regulation of B cell activation	FLT3|CASP3|INPP5D
51716	2.3652e-05	0.00042197	14	987	57	14304	cellular response to stimulus	SHC1|XIAP|FOS|UBE2A|TARBP2|HSP90B1|SOCS2|SULT1A1|PRKRA|CASP3|NEDD4|RIPK1|IKBKG|TAF1
45449	2.6322e-05	0.00046228	24	2622	57	14304	regulation of transcription	RB1|HDAC4|GTF2A1|TBP|UBE2I|SRF|MKL1|TRAF2|MLLT1|FOS|MLLT3|AFF4|TARBP2|TNFRSF1A|CDK9|POLR2A|SNAPC2|MYOD1|NEDD4|NACC1|RIPK1|IKBKG|BCOR|TAF1
10033	2.8273e-05	0.00048891	13	869	57	14304	response to organic substance	HDAC4|SHC1|SRF|FOS|TARBP2|TNFRSF1A|HSP90B1|SOCS2|SOCS1|PRKRA|CASP3|RIPK1|BIRC2
51246	3.4607e-05	0.00058937	11	635	57	14304	regulation of protein metabolic process	HDAC4|SOCS1|UBE2I|NEDD4|NEDD4L|TRAF2|RIPK1|UBE2A|BCOR|TARBP2|TAF1
9966	4.2475e-05	0.00071256	12	773	57	14304	regulation of signal transduction	SOCS2|SOCS1|SHC1|INPP5D|NEDD4|TRAF2|RIPK1|IKBKG|FADD|VAV1|BIRC2|TNFRSF1A
23051	4.5231e-05	0.00073908	12	778	57	14304	regulation of signaling process	SOCS2|SOCS1|SHC1|INPP5D|NEDD4|TRAF2|RIPK1|IKBKG|FADD|VAV1|BIRC2|TNFRSF1A
60261	4.6686e-05	0.00073908	2	3	57	14304	positive regulation of transcription initiation from RNA polymerase II promoter	SRF|TAF1
30422	4.6686e-05	0.00073908	2	3	57	14304	production of siRNA involved in RNA interference	PRKRA|TARBP2
32568	4.6686e-05	0.00073908	2	3	57	14304	general transcription from RNA polymerase II promoter	GTF2A1|TBP
19220	4.8684e-05	0.0007496	10	542	57	14304	regulation of phosphate metabolic process	RB1|SOCS1|SHC1|CASP3|TRAF2|MLLT1|RIPK1|IKBKG|TARBP2|HSP90B1
51174	4.8684e-05	0.0007496	10	542	57	14304	regulation of phosphorus metabolic process	RB1|SOCS1|SHC1|CASP3|TRAF2|MLLT1|RIPK1|IKBKG|TARBP2|HSP90B1
10468	5.4383e-05	0.00082603	25	2928	57	14304	regulation of gene expression	RB1|HDAC4|GTF2A1|SRF|MLLT1|MLLT3|AFF4|POLR2A|SNAPC2|NACC1|RIPK1|IKBKG|TBP|UBE2I|MKL1|TRAF2|FOS|TARBP2|TNFRSF1A|CDK9|PRKRA|MYOD1|NEDD4|BCOR|TAF1
10940	9.3132e-05	0.0013957	2	4	57	14304	positive regulation of necrotic cell death	FAS|RIPK1
45859	9.956e-05	0.0014724	8	369	57	14304	regulation of protein kinase activity	RB1|SHC1|CASP3|TRAF2|MLLT1|RIPK1|IKBKG|TARBP2
6511	0.00010939	0.0015968	7	277	57	14304	ubiquitin-dependent protein catabolic process	UBE2I|CUL5|NEDD4|SIAH1|UBE2A|BIRC2|HSP90B1
43632	0.00012226	0.0017395	7	282	57	14304	modification-dependent macromolecule catabolic process	UBE2I|CUL5|NEDD4|SIAH1|UBE2A|BIRC2|HSP90B1
19941	0.00012226	0.0017395	7	282	57	14304	modification-dependent protein catabolic process	UBE2I|CUL5|NEDD4|SIAH1|UBE2A|BIRC2|HSP90B1
43549	0.00012882	0.00181	8	383	57	14304	regulation of kinase activity	RB1|SHC1|CASP3|TRAF2|MLLT1|RIPK1|IKBKG|TARBP2
42221	0.00013304	0.0018461	16	1465	57	14304	response to chemical stimulus	HDAC4|SHC1|SRF|NEDD4L|FOS|TARBP2|TNFRSF1A|HSP90B1|SOCS2|SULT1A1|SOCS1|PRKRA|CASP3|NEDD4|RIPK1|BIRC2
51338	0.00016775	0.0022994	8	398	57	14304	regulation of transferase activity	RB1|SHC1|CASP3|TRAF2|MLLT1|RIPK1|IKBKG|TARBP2
19221	0.00017083	0.0023134	4	70	57	14304	cytokine-mediated signaling pathway	SOCS1|TRAF2|RIPK1|TNFRSF1A
23036	0.00018049	0.002359	4	71	57	14304	initiation of signal transduction	SOCS1|TRAF2|RIPK1|TNFRSF1A
23038	0.00018049	0.002359	4	71	57	14304	signal initiation by diffusible mediator	SOCS1|TRAF2|RIPK1|TNFRSF1A
23049	0.00018049	0.002359	4	71	57	14304	signal initiation by protein/peptide mediator	SOCS1|TRAF2|RIPK1|TNFRSF1A
42325	0.00019079	0.0024649	9	518	57	14304	regulation of phosphorylation	RB1|SOCS1|SHC1|CASP3|TRAF2|MLLT1|RIPK1|IKBKG|TARBP2
50790	0.00019548	0.0024969	12	907	57	14304	regulation of catalytic activity	RB1|NTRK1|DIABLO|SHC1|CASP3|TRAF2|MLLT1|RIPK1|IKBKG|VAV1|TARBP2|HSP90B1
51090	0.00020323	0.0025382	5	136	57	14304	regulation of transcription factor activity	RB1|HDAC4|TRAF2|RIPK1|IKBKG
90046	0.00020323	0.0025382	5	136	57	14304	regulation of transcription regulator activity	RB1|HDAC4|TRAF2|RIPK1|IKBKG
65009	0.00021866	0.0027008	13	1062	57	14304	regulation of molecular function	RB1|HDAC4|NTRK1|DIABLO|SHC1|TRAF2|MLLT1|VAV1|TARBP2|HSP90B1|CASP3|RIPK1|IKBKG
51603	0.00022348	0.0027303	7	311	57	14304	proteolysis involved in cellular protein catabolic process	UBE2I|CUL5|NEDD4|SIAH1|UBE2A|BIRC2|HSP90B1
10939	0.00023164	0.0027698	2	6	57	14304	regulation of necrotic cell death	FAS|RIPK1
16246	0.00023164	0.0027698	2	6	57	14304	RNA interference	PRKRA|TARBP2
44257	0.00023698	0.0028038	7	314	57	14304	cellular protein catabolic process	UBE2I|CUL5|NEDD4|SIAH1|UBE2A|BIRC2|HSP90B1
51091	0.00031452	0.0036446	4	82	57	14304	positive regulation of transcription factor activity	HDAC4|TRAF2|RIPK1|IKBKG
90047	0.00031452	0.0036446	4	82	57	14304	positive regulation of transcription regulator activity	HDAC4|TRAF2|RIPK1|IKBKG
30889	0.00032346	0.0037099	2	7	57	14304	negative regulation of B cell proliferation	CASP3|INPP5D
44265	0.00033627	0.0038178	8	441	57	14304	cellular macromolecule catabolic process	UBE2I|CUL5|CASP3|NEDD4|SIAH1|UBE2A|BIRC2|HSP90B1
16070	0.00034982	0.003932	12	966	57	14304	RNA metabolic process	CDK9|GTF2A1|TBP|POLR2A|SNAPC2|PRKRA|PHAX|MLLT1|GTF2F1|AFF4|TARBP2|TAF1
71310	0.00036374	0.0040479	6	239	57	14304	cellular response to organic substance	SOCS2|SHC1|PRKRA|FOS|TARBP2|HSP90B1
30163	0.00037706	0.0041551	7	339	57	14304	protein catabolic process	UBE2I|CUL5|NEDD4|SIAH1|UBE2A|BIRC2|HSP90B1
51101	0.00039501	0.0043106	5	157	57	14304	regulation of DNA binding	RB1|HDAC4|TRAF2|RIPK1|IKBKG
8631	0.00043018	0.0046493	2	8	57	14304	induction of apoptosis by oxidative stress	DIABLO|CASP3
90304	0.00044491	0.0047626	15	1460	57	14304	nucleic acid metabolic process	GTF2A1|TBP|PHAX|MLLT1|FOS|UBE2A|GTF2F1|AFF4|TARBP2|CDK9|POLR2A|SNAPC2|PRKRA|CASP3|TAF1
2683	0.00046801	0.0049626	4	91	57	14304	negative regulation of immune system process	FLT3|CASP3|INPP5D|TARBP2
43388	0.00050826	0.0053391	4	93	57	14304	positive regulation of DNA binding	HDAC4|TRAF2|RIPK1|IKBKG
6508	0.00054989	0.0056371	10	730	57	14304	proteolysis	UBE2I|CUL5|CRADD|CASP3|NEDD4|SIAH1|CASP2|UBE2A|BIRC2|HSP90B1
60260	0.00055167	0.0056371	2	9	57	14304	regulation of transcription initiation from RNA polymerase II promoter	SRF|TAF1
1782	0.00055167	0.0056371	2	9	57	14304	B cell homeostasis	CASP3|IKBKG
48519	0.00059016	0.005976	18	2020	57	14304	negative regulation of biological process	RB1|HDAC4|NTRK1|UBE2I|CUL5|FLT3|XIAP|TARBP2|HSP90B1|SOCS2|SOCS1|PRKRA|CASP3|INPP5D|NEDD4|NACC1|FAS|BCOR
48523	0.00059818	0.0060032	17	1844	57	14304	negative regulation of cellular process	RB1|HDAC4|NTRK1|UBE2I|CUL5|FLT3|XIAP|HSP90B1|SOCS2|SOCS1|PRKRA|CASP3|INPP5D|NEDD4|NACC1|FAS|BCOR
6357	0.00065799	0.006545	10	747	57	14304	regulation of transcription from RNA polymerase II promoter	RB1|HDAC4|MYOD1|SRF|NEDD4|FOS|BCOR|TARBP2|TNFRSF1A|TAF1
6469	0.00066865	0.0065926	4	100	57	14304	negative regulation of protein kinase activity	RB1|CASP3|MLLT1|TARBP2
50896	0.00072765	0.0071008	26	3633	57	14304	response to stimulus	HDAC4|CUL5|SHC1|SRF|NEDD4L|XIAP|HSP90B1|SOCS2|SULT1A1|SOCS1|CASP3|INPP5D|RIPK1|IKBKG|FOS|UBE2A|GTF2F1|VAV1|TARBP2|TNFRSF1A|PRKRA|NEDD4|FAS|SGK1|BIRC2|TAF1
8285	0.00073282	0.0071008	7	379	57	14304	negative regulation of cell proliferation	RB1|HDAC4|CUL5|FLT3|PRKRA|CASP3|INPP5D
9057	0.00080223	0.0076508	8	503	57	14304	macromolecule catabolic process	UBE2I|CUL5|CASP3|NEDD4|SIAH1|UBE2A|BIRC2|HSP90B1
33673	0.0008032	0.0076508	4	105	57	14304	negative regulation of kinase activity	RB1|CASP3|MLLT1|TARBP2
33209	0.00083853	0.0078142	2	11	57	14304	tumor necrosis factor-mediated signaling pathway	TRAF2|RIPK1
45577	0.00083853	0.0078142	2	11	57	14304	regulation of B cell differentiation	FLT3|INPP5D
45944	0.00084121	0.0078142	7	388	57	14304	positive regulation of transcription from RNA polymerase II promoter	RB1|HDAC4|MYOD1|SRF|FOS|TNFRSF1A|TAF1
51099	0.00092381	0.0085111	4	109	57	14304	positive regulation of binding	HDAC4|TRAF2|RIPK1|IKBKG
51259	0.00093867	0.0085777	5	190	57	14304	protein oligomerization	NACC1|TRAF2|FADD|BIRC2|TNFRSF1A
51348	0.00098866	0.0089069	4	111	57	14304	negative regulation of transferase activity	RB1|CASP3|MLLT1|TARBP2
70887	0.00099054	0.0089069	7	399	57	14304	cellular response to chemical stimulus	SOCS2|SULT1A1|SHC1|PRKRA|FOS|TARBP2|HSP90B1
48583	0.0010455	0.0093261	8	524	57	14304	regulation of response to stimulus	SOCS1|MYOD1|INPP5D|TRAF2|RIPK1|IKBKG|TARBP2|TNFRSF1A
45935	0.0010614	0.0093942	9	656	57	14304	positive regulation of nucleobase, nucleoside, nucleotide and nucleic acid metabolic process	RB1|HDAC4|TBP|SHC1|MYOD1|SRF|FOS|TNFRSF1A|TAF1
6468	0.0010729	0.0094212	9	657	57	14304	protein amino acid phosphorylation	NTRK1|CDK9|FLT3|SHC1|PRKRA|MYOD1|RIPK1|SGK1|TAF1
51250	0.0010909	0.0094324	3	51	57	14304	negative regulation of lymphocyte activation	FLT3|CASP3|INPP5D
50864	0.0010909	0.0094324	3	51	57	14304	regulation of B cell activation	FLT3|CASP3|INPP5D
43123	0.0011279	0.009612	4	115	57	14304	positive regulation of I-kappaB kinase/NF-kappaB cascade	RIPK1|FADD|BIRC2|TNFRSF1A
10605	0.0011356	0.009612	10	802	57	14304	negative regulation of macromolecule metabolic process	RB1|HDAC4|SOCS1|UBE2I|PRKRA|INPP5D|NEDD4|NACC1|BCOR|TARBP2
10467	0.0011393	0.009612	13	1262	57	14304	gene expression	GTF2A1|TBP|PHAX|MLLT1|GTF2F1|AFF4|TARBP2|CDK9|POLR2A|SNAPC2|PRKRA|CASP2|TAF1
6950	0.0011512	0.009612	16	1773	57	14304	response to stress	HDAC4|CUL5|SRF|XIAP|FOS|UBE2A|TNFRSF1A|HSP90B1|PRKRA|CASP3|NEDD4|RIPK1|IKBKG|SGK1|BIRC2|TAF1
8629	0.0011545	0.009612	3	52	57	14304	induction of apoptosis by intracellular signals	CUL5|DIABLO|CASP3
51098	0.0011802	0.0097067	5	200	57	14304	regulation of binding	RB1|HDAC4|TRAF2|RIPK1|IKBKG
7250	0.0011831	0.0097067	2	13	57	14304	activation of NF-kappaB-inducing kinase activity	TRAF2|IKBKG
10557	0.0012965	0.010495	9	675	57	14304	positive regulation of macromolecule biosynthetic process	RB1|HDAC4|TBP|SHC1|MYOD1|SRF|FOS|TNFRSF1A|TAF1
7166	0.0012979	0.010495	13	1280	57	14304	cell surface receptor linked signaling pathway	NTRK1|FLT3|SHC1|TRAF2|FOS|CBL|VAV1|TNFRSF1A|SOCS2|SOCS1|RIPK1|IKBKG|BIRC2
51173	0.0013235	0.010626	9	677	57	14304	positive regulation of nitrogen compound metabolic process	RB1|HDAC4|TBP|SHC1|MYOD1|SRF|FOS|TNFRSF1A|TAF1
51092	0.0013589	0.010746	3	55	57	14304	positive regulation of NF-kappaB transcription factor activity	TRAF2|RIPK1|IKBKG
31050	0.0013768	0.010746	2	14	57	14304	dsRNA fragmentation	PRKRA|TARBP2
70918	0.0013768	0.010746	2	14	57	14304	production of small RNA involved in gene silencing by RNA	PRKRA|TARBP2
71359	0.0013768	0.010746	2	14	57	14304	cellular response to dsRNA	PRKRA|TARBP2
2682	0.0014081	0.010915	7	424	57	14304	regulation of immune system process	RB1|FLT3|CASP3|INPP5D|TRAF2|IKBKG|TARBP2
2695	0.0014318	0.011023	3	56	57	14304	negative regulation of leukocyte activation	FLT3|CASP3|INPP5D
10629	0.0014418	0.011024	8	551	57	14304	negative regulation of gene expression	RB1|HDAC4|UBE2I|PRKRA|NEDD4|NACC1|BCOR|TARBP2
51291	0.0015071	0.011446	3	57	57	14304	protein heterooligomerization	FADD|BIRC2|TNFRSF1A
43122	0.0016275	0.012277	4	127	57	14304	regulation of I-kappaB kinase/NF-kappaB cascade	RIPK1|FADD|BIRC2|TNFRSF1A
10646	0.0016863	0.012636	12	1154	57	14304	regulation of cell communication	SOCS2|SOCS1|SHC1|INPP5D|NEDD4|TRAF2|RIPK1|IKBKG|FADD|VAV1|BIRC2|TNFRSF1A
42127	0.0017273	0.012858	10	848	57	14304	regulation of cell proliferation	RB1|HDAC4|CUL5|FLT3|SHC1|PRKRA|CASP3|INPP5D|NACC1|UBE2A
10627	0.0017434	0.012892	6	323	57	14304	regulation of intracellular protein kinase cascade	SOCS1|TRAF2|RIPK1|FADD|BIRC2|TNFRSF1A
7169	0.0017623	0.012946	5	219	57	14304	transmembrane receptor protein tyrosine kinase signaling pathway	SOCS2|NTRK1|FLT3|SHC1|CBL
7249	0.001833	0.013379	3	61	57	14304	I-kappaB kinase/NF-kappaB cascade	TRAF2|RIPK1|IKBKG
45941	0.0018874	0.013687	8	575	57	14304	positive regulation of transcription	RB1|HDAC4|TBP|MYOD1|SRF|FOS|TNFRSF1A|TAF1
9411	0.0019208	0.013752	3	62	57	14304	response to UV	CASP3|NEDD4|UBE2A
50866	0.0019208	0.013752	3	62	57	14304	negative regulation of cell activation	FLT3|CASP3|INPP5D
9892	0.0019843	0.014116	10	864	57	14304	negative regulation of metabolic process	RB1|HDAC4|SOCS1|UBE2I|PRKRA|INPP5D|NEDD4|NACC1|BCOR|TARBP2
31328	0.0020244	0.014311	9	720	57	14304	positive regulation of cellular biosynthetic process	RB1|HDAC4|TBP|SHC1|MYOD1|SRF|FOS|TNFRSF1A|TAF1
7165	0.0021091	0.014816	16	1877	57	14304	signal transduction	RB1|NTRK1|CRADD|SHC1|TRAF2|FOS|EPOR|TNFRSF1A|SOCS2|SOCS1|INPP5D|FAS|RIPK1|IKBKG|FADD|CLIC2
9891	0.0022447	0.015671	9	731	57	14304	positive regulation of biosynthetic process	RB1|HDAC4|TBP|SHC1|MYOD1|SRF|FOS|TNFRSF1A|TAF1
45445	0.0022912	0.015897	2	18	57	14304	myoblast differentiation	RB1|MYOD1
7167	0.0024634	0.016987	6	346	57	14304	enzyme linked receptor protein signaling pathway	SOCS2|NTRK1|FLT3|SHC1|FOS|CBL
10628	0.0025386	0.017399	8	603	57	14304	positive regulation of gene expression	RB1|HDAC4|TBP|MYOD1|SRF|FOS|TNFRSF1A|TAF1
9416	0.0025734	0.01753	4	144	57	14304	response to light stimulus	CASP3|NEDD4|FOS|UBE2A
7568	0.0026387	0.017867	4	145	57	14304	aging	SOCS2|SRF|INPP5D|FOS
51318	0.0028308	0.018717	2	20	57	14304	G1 phase	RB1|TAF1
6383	0.0028308	0.018717	2	20	57	14304	transcription from RNA polymerase III promoter	TBP|SNAPC2
42787	0.0028308	0.018717	2	20	57	14304	protein ubiquitination involved in ubiquitin-dependent protein catabolic process	NEDD4|SIAH1
34612	0.0028308	0.018717	2	20	57	14304	response to tumor necrosis factor	CASP3|RIPK1
40008	0.0029588	0.019449	6	359	57	14304	regulation of growth	RB1|SOCS2|SOCS1|SHC1|MYOD1|EBAG9
33554	0.0029833	0.019496	8	619	57	14304	cellular response to stress	CASP3|NEDD4|XIAP|RIPK1|IKBKG|FOS|UBE2A|TAF1
23014	0.0031253	0.020189	6	363	57	14304	signal transmission via phosphorylation event	SOCS2|SOCS1|SHC1|TRAF2|RIPK1|IKBKG
7243	0.0031253	0.020189	6	363	57	14304	intracellular protein kinase cascade	SOCS2|SOCS1|SHC1|TRAF2|RIPK1|IKBKG
42176	0.0031831	0.020445	3	74	57	14304	regulation of protein catabolic process	NEDD4|NEDD4L|TAF1
10551	0.0032778	0.020641	4	154	57	14304	regulation of gene-specific transcription from RNA polymerase II promoter	HDAC4|SRF|BCOR|TAF1
42592	0.0032976	0.020641	9	774	57	14304	homeostatic process	RB1|CUL5|CASP3|SRF|NEDD4L|IKBKG|CLIC2|EPOR|HSP90B1
16441	0.0034241	0.020641	2	22	57	14304	posttranscriptional gene silencing	PRKRA|TARBP2
35194	0.0034241	0.020641	2	22	57	14304	posttranscriptional gene silencing by RNA	PRKRA|TARBP2
6139	0.0034851	0.020641	15	1786	57	14304	nucleobase, nucleoside, nucleotide and nucleic acid metabolic process	GTF2A1|TBP|PHAX|MLLT1|FOS|UBE2A|GTF2F1|AFF4|TARBP2|CDK9|POLR2A|SNAPC2|PRKRA|CASP3|TAF1
51249	0.0035123	0.020641	4	157	57	14304	regulation of lymphocyte activation	FLT3|CASP3|INPP5D|TRAF2
45893	0.0035629	0.020641	7	500	57	14304	positive regulation of transcription, DNA-dependent	RB1|HDAC4|MYOD1|SRF|FOS|TNFRSF1A|TAF1
16310	0.0036524	0.020641	9	786	57	14304	phosphorylation	NTRK1|CDK9|FLT3|SHC1|PRKRA|MYOD1|RIPK1|SGK1|TAF1
10604	0.003692	0.020641	10	941	57	14304	positive regulation of macromolecule metabolic process	RB1|HDAC4|TBP|SHC1|MYOD1|SRF|NEDD4|FOS|TNFRSF1A|TAF1
43066	0.0037154	0.020641	6	376	57	14304	negative regulation of apoptosis	SOCS2|NTRK1|CASP3|XIAP|FAS|HSP90B1
51865	0.0037407	0.020641	2	23	57	14304	protein autoubiquitination	TRAF2|UBE2A
51254	0.0038044	0.020641	7	506	57	14304	positive regulation of RNA metabolic process	RB1|HDAC4|MYOD1|SRF|FOS|TNFRSF1A|TAF1
46777	0.003829	0.020641	3	79	57	14304	protein amino acid autophosphorylation	FLT3|RIPK1|TAF1
2376	0.0038925	0.020641	10	948	57	14304	immune system process	RB1|HDAC4|NTRK1|FLT3|PRKRA|CASP3|INPP5D|FAS|IKBKG|VAV1
6355	0.0039002	0.020641	15	1807	57	14304	regulation of transcription, DNA-dependent	RB1|HDAC4|TBP|UBE2I|SRF|MLLT1|FOS|MLLT3|TARBP2|TNFRSF1A|POLR2A|MYOD1|NEDD4|BCOR|TAF1
6793	0.0039218	0.020641	10	949	57	14304	phosphorus metabolic process	NTRK1|CDK9|FLT3|SHC1|PRKRA|MYOD1|INPP5D|RIPK1|SGK1|TAF1
6796	0.0039218	0.020641	10	949	57	14304	phosphate metabolic process	NTRK1|CDK9|FLT3|SHC1|PRKRA|MYOD1|INPP5D|RIPK1|SGK1|TAF1
43069	0.0039631	0.020641	6	381	57	14304	negative regulation of programmed cell death	SOCS2|NTRK1|CASP3|XIAP|FAS|HSP90B1
117	0.0039849	0.020641	1	1	57	14304	regulation of transcription involved in G2/M-phase of mitotic cell cycle	TAF1
51572	0.0039849	0.020641	1	1	57	14304	negative regulation of histone H3-K4 methylation	BCOR
43415	0.0039849	0.020641	1	1	57	14304	positive regulation of skeletal muscle tissue regeneration	MYOD1
43416	0.0039849	0.020641	1	1	57	14304	regulation of skeletal muscle tissue regeneration	MYOD1
414	0.0039849	0.020641	1	1	57	14304	regulation of histone H3-K36 methylation	BCOR
415	0.0039849	0.020641	1	1	57	14304	negative regulation of histone H3-K36 methylation	BCOR
35280	0.0039849	0.020641	1	1	57	14304	miRNA loading onto RISC involved in gene silencing by miRNA	TARBP2
14854	0.0039849	0.020641	1	1	57	14304	response to inactivity	HDAC4
2572	0.0039849	0.020641	1	1	57	14304	pro-T cell differentiation	FLT3
10766	0.0039849	0.020641	1	1	57	14304	negative regulation of sodium ion transport	NEDD4
31247	0.0039849	0.020641	1	1	57	14304	actin rod assembly	HSP90B1
10767	0.0039849	0.020641	1	1	57	14304	regulation of transcription from RNA polymerase II promoter in response to UV-induced DNA damage	NEDD4
10768	0.0039849	0.020641	1	1	57	14304	negative regulation of transcription from RNA polymerase II promoter in response to UV-induced DNA damage	NEDD4
14870	0.0039849	0.020641	1	1	57	14304	response to muscle inactivity	HDAC4
14877	0.0039849	0.020641	1	1	57	14304	response to muscle inactivity involved in regulation of muscle adaptation	HDAC4
14894	0.0039849	0.020641	1	1	57	14304	response to denervation involved in regulation of muscle adaptation	HDAC4
45659	0.0039849	0.020641	1	1	57	14304	negative regulation of neutrophil differentiation	INPP5D
51821	0.0039849	0.020641	1	1	57	14304	dissemination or transmission of organism from other organism involved in symbiotic interaction	NEDD4
19089	0.0039849	0.020641	1	1	57	14304	transmission of virus	NEDD4
45820	0.0039849	0.020641	1	1	57	14304	negative regulation of glycolysis	HDAC4
44007	0.0039849	0.020641	1	1	57	14304	dissemination or transmission of symbiont from host	NEDD4
44111	0.0039849	0.020641	1	1	57	14304	development involved in symbiotic interaction	NEDD4
70926	0.0039849	0.020641	1	1	57	14304	regulation of ATP:ADP antiporter activity	RIPK1
65001	0.0039849	0.020641	1	1	57	14304	specification of axis polarity	BCOR
32570	0.0040703	0.020987	2	24	57	14304	response to progesterone stimulus	SOCS1|FOS
6807	0.0041551	0.021326	17	2196	57	14304	nitrogen compound metabolic process	GAMT|GTF2A1|TBP|PHAX|MLLT1|FOS|UBE2A|GTF2F1|AFF4|TARBP2|SULT1A1|CDK9|POLR2A|SNAPC2|PRKRA|CASP3|TAF1
60548	0.0043849	0.022403	6	389	57	14304	negative regulation of cell death	SOCS2|NTRK1|CASP3|XIAP|FAS|HSP90B1
2260	0.004413	0.022444	2	25	57	14304	lymphocyte homeostasis	CASP3|IKBKG
9967	0.0047651	0.024035	5	276	57	14304	positive regulation of signal transduction	NEDD4|RIPK1|FADD|BIRC2|TNFRSF1A
7173	0.0047686	0.024035	2	26	57	14304	epidermal growth factor receptor signaling pathway	SHC1|CBL
51252	0.0050306	0.025243	15	1856	57	14304	regulation of RNA metabolic process	RB1|HDAC4|TBP|UBE2I|SRF|MLLT1|FOS|MLLT3|TARBP2|TNFRSF1A|POLR2A|MYOD1|NEDD4|BCOR|TAF1
43331	0.0051369	0.025443	2	27	57	14304	response to dsRNA	PRKRA|TARBP2
23056	0.0051383	0.025443	5	281	57	14304	positive regulation of signaling process	NEDD4|RIPK1|FADD|BIRC2|TNFRSF1A
9894	0.0051383	0.025443	5	281	57	14304	regulation of catabolic process	HDAC4|NEDD4|NEDD4L|VAV1|TAF1
2694	0.0055906	0.027561	4	179	57	14304	regulation of leukocyte activation	FLT3|CASP3|INPP5D|TRAF2
40029	0.0056877	0.027917	3	91	57	14304	regulation of gene expression, epigenetic	PRKRA|FOS|TARBP2
35466	0.0057893	0.028292	10	1003	57	14304	regulation of signaling pathway	SOCS1|SHC1|NEDD4|TRAF2|RIPK1|IKBKG|FADD|VAV1|BIRC2|TNFRSF1A
34641	0.0059064	0.028739	16	2078	57	14304	cellular nitrogen compound metabolic process	GTF2A1|TBP|PHAX|MLLT1|FOS|UBE2A|GTF2F1|AFF4|TARBP2|SULT1A1|CDK9|POLR2A|SNAPC2|PRKRA|CASP3|TAF1
46649	0.0063936	0.030689	4	186	57	14304	lymphocyte activation	HDAC4|NTRK1|FLT3|VAV1
30098	0.0064081	0.030689	3	95	57	14304	lymphocyte differentiation	HDAC4|NTRK1|FLT3
48872	0.0064081	0.030689	3	95	57	14304	homeostasis of number of cells	RB1|CASP3|IKBKG
9893	0.0064163	0.030689	10	1018	57	14304	positive regulation of metabolic process	RB1|HDAC4|TBP|SHC1|MYOD1|SRF|NEDD4|FOS|TNFRSF1A|TAF1
32268	0.0065192	0.031049	7	559	57	14304	regulation of cellular protein metabolic process	HDAC4|SOCS1|TRAF2|RIPK1|BCOR|TARBP2|TAF1
32945	0.0067363	0.03168	2	31	57	14304	negative regulation of mononuclear cell proliferation	CASP3|INPP5D
70664	0.0067363	0.03168	2	31	57	14304	negative regulation of leukocyte proliferation	CASP3|INPP5D
50672	0.0067363	0.03168	2	31	57	14304	negative regulation of lymphocyte proliferation	CASP3|INPP5D
50865	0.007012	0.032839	4	191	57	14304	regulation of cell activation	FLT3|CASP3|INPP5D|TRAF2
23052	0.0071183	0.033016	21	3130	57	14304	signaling	RB1|NTRK1|CRADD|FLT3|SHC1|TRAF2|FOS|CBL|VAV1|EPOR|TNFRSF1A|SOCS2|SOCS1|INPP5D|NEDD4|FAS|RIPK1|IKBKG|FADD|CLIC2|BIRC2
30888	0.0071671	0.033016	2	32	57	14304	regulation of B cell proliferation	CASP3|INPP5D
31334	0.0071671	0.033016	2	32	57	14304	positive regulation of protein complex assembly	SRF|TAF1
1776	0.0071671	0.033016	2	32	57	14304	leukocyte homeostasis	CASP3|IKBKG
6875	0.0075343	0.033866	4	195	57	14304	cellular metal ion homeostasis	CUL5|NEDD4L|EPOR|HSP90B1
10552	0.0075868	0.033866	3	101	57	14304	positive regulation of gene-specific transcription from RNA polymerase II promoter	HDAC4|SRF|TAF1
51329	0.0077949	0.033866	3	102	57	14304	interphase of mitotic cell cycle	RB1|CUL5|TAF1
71763	0.0079542	0.033866	1	2	57	14304	nuclear membrane organization	CASP3
6408	0.0079542	0.033866	1	2	57	14304	snRNA export from nucleus	PHAX
6601	0.0079542	0.033866	1	2	57	14304	creatine biosynthetic process	GAMT
10735	0.0079542	0.033866	1	2	57	14304	positive regulation of transcription via serum response element binding	SRF
70171	0.0079542	0.033866	1	2	57	14304	negative regulation of tooth mineralization	BCOR
14887	0.0079542	0.033866	1	2	57	14304	cardiac muscle adaptation	HDAC4
14898	0.0079542	0.033866	1	2	57	14304	cardiac muscle hypertrophy in response to stress	HDAC4
45656	0.0079542	0.033866	1	2	57	14304	negative regulation of monocyte differentiation	INPP5D
45658	0.0079542	0.033866	1	2	57	14304	regulation of neutrophil differentiation	INPP5D
3299	0.0079542	0.033866	1	2	57	14304	muscle hypertrophy in response to stress	HDAC4
70897	0.0079542	0.033866	1	2	57	14304	transcriptional preinitiation complex assembly	TAF1
70922	0.0079542	0.033866	1	2	57	14304	small RNA loading onto RISC	TARBP2
7518	0.0079542	0.033866	1	2	57	14304	myoblast cell fate determination	MYOD1
50689	0.0079542	0.033866	1	2	57	14304	negative regulation of defense response to virus by host	TARBP2
30264	0.0079542	0.033866	1	2	57	14304	nuclear fragmentation involved in apoptotic nuclear change	CASP3
51030	0.0079542	0.033866	1	2	57	14304	snRNA transport	PHAX
51123	0.0079542	0.033866	1	2	57	14304	RNA polymerase II transcriptional preinitiation complex assembly	TAF1
6916	0.0080818	0.034279	4	199	57	14304	anti-apoptosis	SOCS2|XIAP|FAS|HSP90B1
23046	0.0084296	0.035487	16	2156	57	14304	signaling process	RB1|NTRK1|CRADD|SHC1|TRAF2|FOS|EPOR|TNFRSF1A|SOCS2|SOCS1|INPP5D|FAS|RIPK1|IKBKG|FADD|CLIC2
23060	0.0084296	0.035487	16	2156	57	14304	signal transmission	RB1|NTRK1|CRADD|SHC1|TRAF2|FOS|EPOR|TNFRSF1A|SOCS2|SOCS1|INPP5D|FAS|RIPK1|IKBKG|FADD|CLIC2
7259	0.0085323	0.035785	2	35	57	14304	JAK-STAT cascade	SOCS2|SOCS1
51325	0.0086609	0.03614	3	106	57	14304	interphase	RB1|CUL5|TAF1
80134	0.0086813	0.03614	5	319	57	14304	regulation of response to stress	MYOD1|TRAF2|RIPK1|TARBP2|TNFRSF1A
10558	0.0088989	0.036909	7	593	57	14304	negative regulation of macromolecule biosynthetic process	RB1|HDAC4|UBE2I|INPP5D|NEDD4|NACC1|BCOR
55065	0.0089512	0.036989	4	205	57	14304	metal ion homeostasis	CUL5|NEDD4L|EPOR|HSP90B1
43406	0.0091142	0.037525	3	108	57	14304	positive regulation of MAP kinase activity	SHC1|TRAF2|RIPK1
45639	0.009502	0.038979	2	37	57	14304	positive regulation of myeloid cell differentiation	RB1|INPP5D
31047	0.010004	0.040537	2	38	57	14304	gene silencing by RNA	PRKRA|TARBP2
43507	0.010004	0.040537	2	38	57	14304	positive regulation of JUN kinase activity	TRAF2|RIPK1
45807	0.010004	0.040537	2	38	57	14304	positive regulation of endocytosis	NEDD4L|CBL
32583	0.01004	0.040537	4	212	57	14304	regulation of gene-specific transcription	HDAC4|SRF|BCOR|TAF1
7265	0.010062	0.040537	3	112	57	14304	Ras protein signal transduction	RB1|NTRK1|SHC1
19725	0.010318	0.04142	6	466	57	14304	cellular homeostasis	CUL5|SRF|NEDD4L|CLIC2|EPOR|HSP90B1
31327	0.010393	0.041571	7	611	57	14304	negative regulation of cellular biosynthetic process	RB1|HDAC4|UBE2I|INPP5D|NEDD4|NACC1|BCOR
51147	0.010518	0.041924	2	39	57	14304	regulation of muscle cell differentiation	HDAC4|SRF
9314	0.0107	0.042497	4	216	57	14304	response to radiation	CASP3|NEDD4|FOS|UBE2A
32496	0.011065	0.043037	3	116	57	14304	response to lipopolysaccharide	SOCS1|FOS|TNFRSF1A
9890	0.011298	0.043037	7	621	57	14304	negative regulation of biosynthetic process	RB1|HDAC4|UBE2I|INPP5D|NEDD4|NACC1|BCOR
44248	0.011323	0.043037	8	776	57	14304	cellular catabolic process	UBE2I|CUL5|CASP3|NEDD4|SIAH1|UBE2A|BIRC2|HSP90B1
7507	0.011563	0.043037	4	221	57	14304	heart development	CASP3|SRF|BCOR|EPOR
10740	0.011741	0.043037	4	222	57	14304	positive regulation of intracellular protein kinase cascade	RIPK1|FADD|BIRC2|TNFRSF1A
51130	0.011741	0.043037	4	222	57	14304	positive regulation of cellular component organization	SRF|NEDD4L|CBL|TAF1
51208	0.011908	0.043037	1	3	57	14304	sequestering of calcium ion	HSP90B1
30948	0.011908	0.043037	1	3	57	14304	negative regulation of vascular endothelial growth factor receptor signaling pathway	NEDD4
2318	0.011908	0.043037	1	3	57	14304	myeloid progenitor cell differentiation	FLT3
45578	0.011908	0.043037	1	3	57	14304	negative regulation of B cell differentiation	FLT3
14874	0.011908	0.043037	1	3	57	14304	response to stimulus involved in regulation of muscle adaptation	HDAC4
14897	0.011908	0.043037	1	3	57	14304	striated muscle hypertrophy	HDAC4
10832	0.011908	0.043037	1	3	57	14304	negative regulation of myotube differentiation	HDAC4
10882	0.011908	0.043037	1	3	57	14304	regulation of cardiac muscle contraction by calcium ion signaling	HDAC4
46007	0.011908	0.043037	1	3	57	14304	negative regulation of activated T cell proliferation	CASP3
9301	0.011908	0.043037	1	3	57	14304	snRNA transcription	SNAPC2
60544	0.011908	0.043037	1	3	57	14304	regulation of necroptosis	RIPK1
60545	0.011908	0.043037	1	3	57	14304	positive regulation of necroptosis	RIPK1
60553	0.011908	0.043037	1	3	57	14304	induction of necroptosis	RIPK1
60555	0.011908	0.043037	1	3	57	14304	induction of necroptosis by extracellular signals	RIPK1
3300	0.011908	0.043037	1	3	57	14304	cardiac muscle hypertrophy	HDAC4
70933	0.011908	0.043037	1	3	57	14304	histone H4 deacetylation	HDAC4
70932	0.011908	0.043037	1	3	57	14304	histone H3 deacetylation	HDAC4
42396	0.011908	0.043037	1	3	57	14304	phosphagen biosynthetic process	GAMT
1661	0.011908	0.043037	1	3	57	14304	conditioned taste aversion	FOS
71318	0.011908	0.043037	1	3	57	14304	cellular response to ATP	HSP90B1
30423	0.011908	0.043037	1	3	57	14304	targeting of mRNA for destruction involved in RNA interference	TARBP2
51154	0.011908	0.043037	1	3	57	14304	negative regulation of striated muscle cell differentiation	HDAC4
43506	0.012129	0.043631	2	42	57	14304	regulation of JUN kinase activity	TRAF2|RIPK1
31324	0.01217	0.043631	8	786	57	14304	negative regulation of cellular metabolic process	RB1|HDAC4|SOCS1|UBE2I|INPP5D|NEDD4|NACC1|BCOR
51094	0.012189	0.043631	5	347	57	14304	positive regulation of developmental process	RB1|MYOD1|SRF|INPP5D|TNFRSF1A
9968	0.012398	0.04424	3	121	57	14304	negative regulation of signal transduction	SOCS2|SOCS1|INPP5D
50793	0.01261	0.044854	8	791	57	14304	regulation of developmental process	RB1|HDAC4|FLT3|MYOD1|SRF|INPP5D|BCOR|TNFRSF1A
7565	0.012675	0.044944	3	122	57	14304	female pregnancy	FOS|UBE2A|EPOR
23057	0.012956	0.045693	3	123	57	14304	negative regulation of signaling process	SOCS2|SOCS1|INPP5D
44093	0.012968	0.045693	7	638	57	14304	positive regulation of molecular function	HDAC4|NTRK1|DIABLO|SHC1|TRAF2|RIPK1|IKBKG
45732	0.013259	0.046427	2	44	57	14304	positive regulation of protein catabolic process	NEDD4|TAF1
30183	0.013259	0.046427	2	44	57	14304	B cell differentiation	HDAC4|NTRK1
9719	0.013351	0.046604	6	493	57	14304	response to endogenous stimulus	SOCS2|SOCS1|SHC1|SRF|FOS|BIRC2
16481	0.013474	0.046888	6	494	57	14304	negative regulation of transcription	RB1|HDAC4|UBE2I|NEDD4|NACC1|BCOR
31325	0.013519	0.046901	9	966	57	14304	positive regulation of cellular metabolic process	RB1|HDAC4|TBP|SHC1|MYOD1|SRF|FOS|TNFRSF1A|TAF1
51707	0.013646	0.047195	5	357	57	14304	response to other organism	SOCS1|PRKRA|FOS|GTF2F1|TNFRSF1A
45321	0.013814	0.047358	4	233	57	14304	leukocyte activation	HDAC4|NTRK1|FLT3|VAV1
30097	0.013814	0.047358	4	233	57	14304	hemopoiesis	RB1|HDAC4|NTRK1|FLT3
48585	0.01382	0.047358	3	126	57	14304	negative regulation of response to stimulus	SOCS1|INPP5D|TARBP2
2237	0.014115	0.048076	3	127	57	14304	response to molecule of bacterial origin	SOCS1|FOS|TNFRSF1A
2521	0.014115	0.048076	3	127	57	14304	leukocyte differentiation	HDAC4|NTRK1|FLT3
50776	0.014215	0.04827	4	235	57	14304	regulation of immune response	INPP5D|TRAF2|IKBKG|TARBP2
45860	0.014418	0.048812	4	236	57	14304	positive regulation of protein kinase activity	SHC1|TRAF2|RIPK1|IKBKG
[truncated: 9 more columns]
